# Supplementary material for: NHC-catalyzed oxindole synthesis via single electron transfer
Source: Royal Society of Chemistry journal article supplement (doi:10.1039/d0qo01508c), 2021-01-01

## Supporting Information

### **NHC-Catalyzed Oxindole Synthesis via Single Electron Transfer**

Chengming Wang\*, Lixia Liu

*Department of Chemistry, College of Chemistry and Materials Science*

*Jinan University*

*Guangzhou, 511486, China*

*Email: [cmwang2019@jnu.edu.cn](mailto:cmwang2019@jnu.edu.cn)*

#### **Table of Contents:**

---

|                                                                |              |
|----------------------------------------------------------------|--------------|
| <b>General Methods and Materials</b>                           | <b>1</b>     |
| <b>Conditions Screening</b>                                    | <b>2-4</b>   |
| <b>General Procedure for NHC-Catalyzed Radical Cyclization</b> | <b>5</b>     |
| <b>Characterization of Oxindole Products</b>                   | <b>6-15</b>  |
| <b>Diversity of the Products</b>                               | <b>16-24</b> |
| <b>Mechanism Study</b>                                         | <b>25-31</b> |
| <b>References</b>                                              | <b>32</b>    |
| <b>NMR Spectra Images of Products</b>                          | <b>33-91</b> |

---

## General Methods and Materials:

Unless specified, all reactions were carried out under a nitrogen atmosphere (balloon) with dry solvents under anhydrous conditions.  $\alpha$ -bromoamide starting materials were synthesized according to a previous literature.<sup>1</sup>  $\text{Cs}_2\text{CO}_3$  (purity: 98%) was purchased from Alfa Aesar; 1, 4-dioxane (super dry, 99.8%) was purchased from J&K; all other reagents were purchased and used without further purification unless specified otherwise. Solvents for chromatography were technical grade and distilled prior to use. Flash chromatography was performed using 200-300 mesh silica gel with the indicated solvent system according to standard techniques. Analytical thin-layer chromatography (TLC) was performed on pre-coated, glass-backed silica gel plates. Visualization of the developed chromatogram was performed by UV absorbance (254 nm).  $^1\text{H}$  NMR and  $^{13}\text{C}$  NMR data were recorded on Bruker 300 M nuclear resonance spectrometers unless otherwise specified, respectively. Chemical shifts ( $\delta$ ) in ppm are reported as quoted relative to the residual signals of chloroform ( $^1\text{H}$  7.26 ppm or  $^{13}\text{C}$  77.16 ppm). Multiplicities are described as: s (singlet), bs (broad singlet), d (doublet), t (triplet), q (quartet), m (multiplet); and coupling constants ( $J$ ) are reported in Hertz (Hz).  $^{13}\text{C}$  NMR spectra were recorded with total proton decoupling. HRMS (ESI) analysis was performed by The Analytical Instrumentation Center at College of Chemistry and Materials Science, Jinan University, and (HRMS) data were reported with ion mass/charge ( $m/z$ ) ratios as values in atomic mass units.

Conditions screening <sup>a</sup>

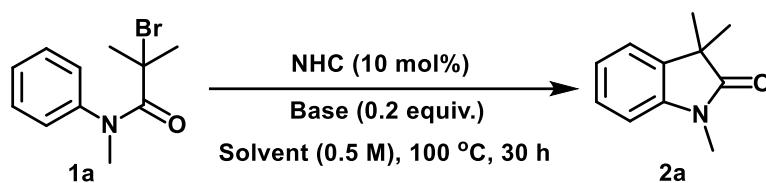

| Entry           | Solvent                     | Catalysis      | Base                                            | Isolated yield |
|-----------------|-----------------------------|----------------|-------------------------------------------------|----------------|
| 1               | THF                         | NHC A          | Cs <sub>2</sub> CO <sub>3</sub>                 | 28%            |
| 2               | 1, 4-dioxane                | NHC A          | Cs <sub>2</sub> CO <sub>3</sub>                 | 33%            |
| 3               | MeCN                        | NHC A          | Cs <sub>2</sub> CO <sub>3</sub>                 | 13%            |
| 4               | Toluene                     | NHC A          | Cs <sub>2</sub> CO <sub>3</sub>                 | 21%            |
| 5               | DCE                         | NHC A          | Cs <sub>2</sub> CO <sub>3</sub>                 | 11%            |
| 6               | DMF                         | NHC A          | Cs <sub>2</sub> CO <sub>3</sub>                 | <5%            |
| 7               | MTBE                        | NHC A          | Cs <sub>2</sub> CO <sub>3</sub>                 | 12%            |
| 8 <sup>b</sup>  | 1, 4-dioxane                | NHC A          | Cs <sub>2</sub> CO <sub>3</sub>                 | 37%            |
| 9 <sup>c</sup>  | 1, 4-dioxane                | NHC A          | Cs <sub>2</sub> CO <sub>3</sub>                 | 33%            |
| 10              | 1, 4-dioxane (0.15 M)       | NHC A          | Cs <sub>2</sub> CO <sub>3</sub>                 | 33%            |
| 11              | 1, 4-dioxane (0.2 M)        | NHC A          | Cs <sub>2</sub> CO <sub>3</sub>                 | 32%            |
| 12              | 1, 4-dioxane (0.3 M)        | NHC A          | Cs <sub>2</sub> CO <sub>3</sub>                 | 39%            |
| 13              | 1, 4-dioxane (0.3 M)        | NHC A          | Cs <sub>2</sub> CO <sub>3</sub> (0.1 equiv)     | 9%             |
| 14              | 1, 4-dioxane (0.3 M)        | NHC A          | Cs <sub>2</sub> CO <sub>3</sub> (0.2 equiv)     | 39%            |
| 15              | 1, 4-dioxane (0.3 M)        | NHC A          | Cs <sub>2</sub> CO <sub>3</sub> (0.3 equiv)     | 44%            |
| 16              | 1, 4-dioxane (0.3 M)        | NHC A          | Cs <sub>2</sub> CO <sub>3</sub> (0.5 equiv)     | 77%            |
| 17              | <b>1, 4-dioxane (0.3 M)</b> | <b>NHC A</b>   | <b>Cs<sub>2</sub>CO<sub>3</sub> (0.8 equiv)</b> | <b>88%</b>     |
| 18              | 1, 4-dioxane (0.3 M)        | NHC A          | Cs <sub>2</sub> CO <sub>3</sub> (1.0 equiv)     | 71%            |
| 19              | 1, 4-dioxane (0.3 M)        | NHC A          | Cs <sub>2</sub> CO <sub>3</sub> (1.2 equiv)     | 53%            |
| 20              | 1, 4-dioxane (0.3 M)        | NHC A          | Cs <sub>2</sub> CO <sub>3</sub> (1.5 equiv)     | 50%            |
| 21              | 1, 4-dioxane (0.3 M)        | NHC A          | Cs <sub>2</sub> CO <sub>3</sub> (2.0 equiv)     | 45%            |
| 22 <sup>d</sup> | 1, 4-dioxane (0.3 M)        | NHC A          | Cs <sub>2</sub> CO <sub>3</sub> (0.8 equiv)     | 77%            |
| 23 <sup>d</sup> | 1, 4-dioxane (0.3 M)        | NHC A (5 mol%) | Cs <sub>2</sub> CO <sub>3</sub> (0.8 equiv)     | 43%            |
| 24 <sup>c</sup> | 1, 4-dioxane (0.3 M)        | NHC A          | Cs <sub>2</sub> CO <sub>3</sub> (0.8 equiv)     | 83%            |
| 25 <sup>e</sup> | 1, 4-dioxane (0.3 M)        | NHC A          | Cs <sub>2</sub> CO <sub>3</sub> (0.8 equiv)     | 35%            |
| 26 <sup>f</sup> | 1, 4-dioxane (0.3 M)        | NHC A          | Cs <sub>2</sub> CO <sub>3</sub> (0.8 equiv)     | 16%            |
| 27              | 1, 4-dioxane (0.3 M)        | –              | Cs <sub>2</sub> CO <sub>3</sub> (0.8 equiv)     | 0%             |
| 28              | 1, 4-dioxane (0.3 M)        | –              | K <sub>2</sub> CO <sub>3</sub> (0.8 equiv)      | 0%             |
| 29              | 1, 4-dioxane (0.3 M)        | –              | NaHCO <sub>3</sub> (0.8 equiv)                  | 0%             |
| 30              | 1, 4-dioxane (0.3 M)        | –              | <i>t</i> -BuONa (0.8 equiv)                     | 0%             |
| 31              | 1, 4-dioxane (0.3 M)        | –              | KOAc (0.8 equiv)                                | 0%             |
| 32              | 1, 4-dioxane (0.3 M)        | –              | NaOH (0.8 equiv)                                | trace          |
| 33              | 1, 4-dioxane (0.3 M)        | –              | Na <sub>2</sub> CO <sub>3</sub> (0.8 equiv)     | 0%             |
| 34              | 1, 4-dioxane (0.3 M)        | –              | DBU (0.8 equiv)                                 | 0%             |
| 35              | 1, 4-dioxane (0.3 M)        | –              | Et <sub>3</sub> N (0.8 equiv)                   | 0%             |

|                 |                      |       |                                             |       |
|-----------------|----------------------|-------|---------------------------------------------|-------|
| 36              | 1, 4-dioxane (0.3 M) | –     | DIPEA (0.8 equiv)                           | trace |
| 37              | 1, 4-dioxane (0.3 M) | –     | TMP (0.8 equiv)                             | 0%    |
| 38              | 1, 4-dioxane (0.3 M) | –     | K <sub>3</sub> PO <sub>4</sub> (0.8 equiv)  | 0%    |
| 39              | 1, 4-dioxane (0.3 M) | –     | –                                           | 0%    |
| 40              | 1, 4-dioxane (0.3 M) | NHC A | –                                           | 0%    |
| 41              | 1, 4-dioxane (0.3 M) | NHC A | <i>t</i> -BuONa (0.8 equiv)                 | 14%   |
| 42              | 1, 4-dioxane (0.3 M) | NHC A | DIPEA (0.8 equiv)                           | 10%   |
| 43              | 1, 4-dioxane (0.3 M) | NHC A | DBU (0.8 equiv)                             | 6%    |
| 44              | 1, 4-dioxane (0.3 M) | NHC A | NaOH (0.8 equiv)                            | 33%   |
| 45              | 1, 4-dioxane (0.3 M) | NHC A | K <sub>2</sub> CO <sub>3</sub> (0.8 equiv)  | 51%   |
| 46              | 1, 4-dioxane (0.3 M) | NHC B | Cs <sub>2</sub> CO <sub>3</sub> (0.8 equiv) | <5%   |
| 47              | 1, 4-dioxane (0.3 M) | MHC C | Cs <sub>2</sub> CO <sub>3</sub> (0.8 equiv) | <5%   |
| 48              | 1, 4-dioxane (0.3 M) | NHC D | Cs <sub>2</sub> CO <sub>3</sub> (0.8 equiv) | 0%    |
| 49              | 1, 4-dioxane (0.3 M) | NHC E | Cs <sub>2</sub> CO <sub>3</sub> (0.8 equiv) | 22%   |
| 50              | 1, 4-dioxane (0.3 M) | NHC F | Cs <sub>2</sub> CO <sub>3</sub> (0.8 equiv) | 10%   |
| 51              | 1, 4-dioxane (0.3 M) | NHC G | Cs <sub>2</sub> CO <sub>3</sub> (0.8 equiv) | trace |
| 52              | 1, 4-dioxane (0.3 M) | NHC H | Cs <sub>2</sub> CO <sub>3</sub> (0.8 equiv) | 30%   |
| 53              | 1, 4-dioxane (0.3 M) | NHC I | Cs <sub>2</sub> CO <sub>3</sub> (0.8 equiv) | 45%   |
| 54              | 1, 4-dioxane (0.3 M) | NHC J | Cs <sub>2</sub> CO <sub>3</sub> (0.8 equiv) | 79%   |
| 55              | 1, 4-dioxane (0.3 M) | NHC K | Cs <sub>2</sub> CO <sub>3</sub> (0.8 equiv) | 13%   |
| 56              | 1, 4-dioxane (0.3 M) | NHC L | Cs <sub>2</sub> CO <sub>3</sub> (0.8 equiv) | 0%    |
| 57              | 1, 4-dioxane (0.3 M) | NHC M | Cs <sub>2</sub> CO <sub>3</sub> (0.8 equiv) | 41%   |
| 58              | 1, 4-dioxane (0.3 M) | NHC N | Cs <sub>2</sub> CO <sub>3</sub> (0.8 equiv) | 63%   |
| 59              | 1, 4-dioxane (0.3 M) | NHC O | Cs <sub>2</sub> CO <sub>3</sub> (0.8 equiv) | 10%   |
| 60 <sup>g</sup> | 1, 4-dioxane (0.3 M) | NHC A | Cs <sub>2</sub> CO <sub>3</sub> (0.8 equiv) | 0%    |

<sup>a</sup>. Reaction on a 0.3 mmol scale, under N<sub>2</sub>, isolated yield; <sup>b</sup>. react at 120 °C; <sup>c</sup>. react at 80 °C;

<sup>d</sup>. react for 22 h; <sup>e</sup>. react at 60 °C; <sup>f</sup>. react at 40 °C; <sup>g</sup>. react at rt.

#### Note:

DCE = 1, 2-dichloroethane; MTBE = *tert*-Butyl methyl ether; DIPEA = N, N-diisopropylethylamine; DBU = 1, 8-Diazabicyclo[5, 4, 0]undec-7-ene; TMP = 2, 2, 6, 6-tetramethylpiperidine.

The structure of NHC catalysts:

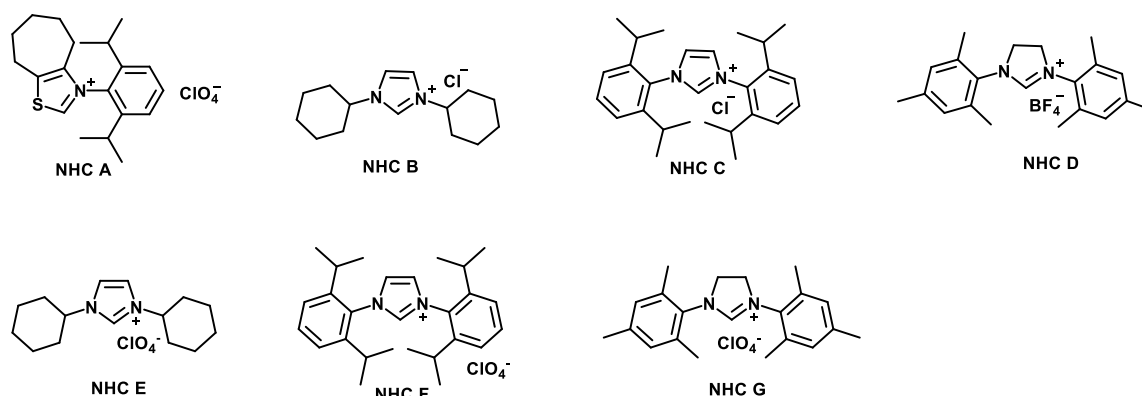

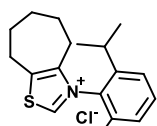

NHC H

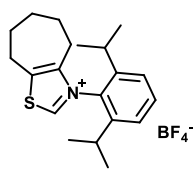

NHC I

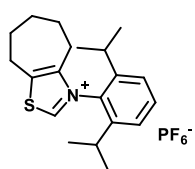

NHC J

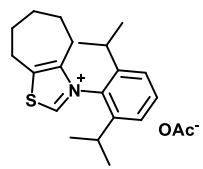

NHC K

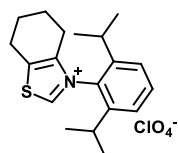

NHC L

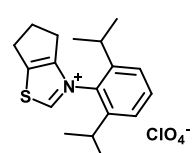

NHC M

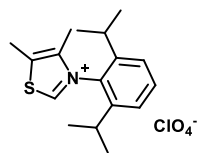

NHC N

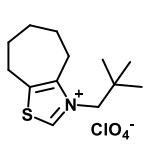

NHC O

## General Procedure for NHC-Catalyzed Oxindole Synthesis

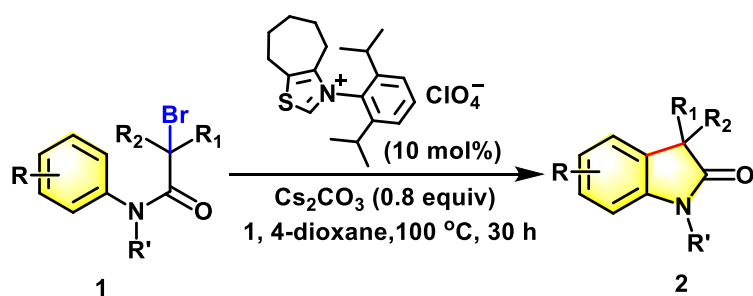

$\alpha$ -bromoamide **1** (0.3 mmol, 1.0 equiv.), NHC **A** (10 mol%) and  $\text{Cs}_2\text{CO}_3$  (0.24 mmol, 0.8 equiv.) were weighed into a Schlenk tube. The reaction vessel was capped and subjected to three vacuum-purge/nitrogen-flush cycles. Then 1, 4-dioxane (1.0 mL) was added through the side-arm by syringe (*if  $\alpha$ -bromoamide **1** is a liquid, it was first dissolved in 1, 4-dioxane, then added to the reaction tube*). The reaction was stirred under nitrogen at  $100\text{ }^\circ\text{C}$  for 30 h. Upon complete consumption of  $\alpha$ -bromoamide **1** compound, the reaction was cooled to room temperature. Volatile solvent and reagents were removed by rotary evaporation and the residue was purified by silica gel flash chromatography using petroleum ether/EtOAc (50:1 to 30:1) to afford the desired product **2**.

## General Procedure for Scalable Reaction (5.0 mmol scale)

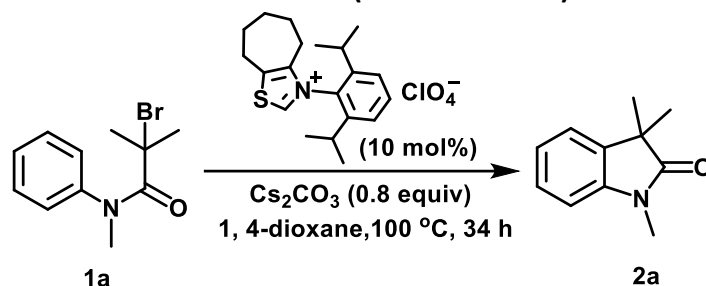

$\alpha$ -bromoamide **1a** (5 mmol, 1.28 g), NHC **A** (0.5 mol, 207 mg) and  $\text{Cs}_2\text{CO}_3$  (4 mmol, 1.30 g) were weighed into a 100 mL Schlenk tube. The reaction vessel was capped and subjected to three vacuum-purge/nitrogen-flush cycles. Then 1, 4-dioxane (20 mL) was added through the side-arm by syringe. The reaction was stirred under nitrogen at  $100\text{ }^\circ\text{C}$  for 34 h. Upon complete consumption of  $\alpha$ -bromoamide **1a** compound, the reaction was cooled to room temperature. Volatile solvent and reagents were removed by rotary evaporation and the residue was purified by silica gel flash chromatography using petroleum ether/EtOAc (50:1 to 30:1) to afford the desired product **2a** as a yellow oil, got: 767 mg, yield: 88%.

## Characterization of Oxindole Products

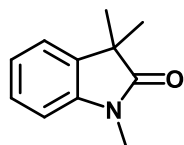

**1, 3, 3-trimethylindolin-2-one (2a).**<sup>2</sup> yield: 88%, yellow oil. <sup>1</sup>H NMR (CDCl<sub>3</sub>, 300 MHz):  $\delta$  7.25 (t,  $J$  = 7.8 Hz, 1H), 7.20 (d,  $J$  = 7.3 Hz, 1H), 7.05 (t,  $J$  = 7.5 Hz, 1H), 6.84 (d,  $J$  = 7.7 Hz, 1H), 3.21 (s, 3H), 1.37 (s, 6H); <sup>13</sup>C NMR (CDCl<sub>3</sub>, 75 MHz):  $\delta$  181.3, 142.6, 135.8, 127.7, 122.5, 122.2, 108.0, 44.1, 26.2, 24.4.

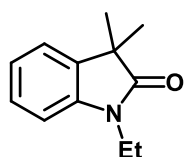

**1-ethyl-3,3-dimethylindolin-2-one (2b).**<sup>2</sup> yield: 61%, yellow oil. <sup>1</sup>H NMR (CDCl<sub>3</sub>, 300 MHz):  $\delta$  7.28-7.20 (m, 2H), 7.05 (t,  $J$  = 7.5 Hz, 1H), 6.87 (d,  $J$  = 7.7 Hz, 1H), 3.77 (q,  $J$  = 7.2 Hz, 2H), 1.37 (s, 6H), 1.26 (t,  $J$  = 7.1 Hz, 3H); <sup>13</sup>C NMR (CDCl<sub>3</sub>, 75 MHz):  $\delta$  181.1, 141.8, 136.2, 127.7, 122.5, 122.3, 108.3, 44.2, 34.6, 24.5, 12.8.

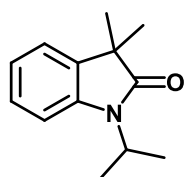

**1-isopropyl-3,3-dimethylindolin-2-one (2c).**<sup>2</sup> yield: 75%, yellow oil. <sup>1</sup>H NMR (CDCl<sub>3</sub>, 300 MHz):  $\delta$  7.26-7.19 (m, 2H), 7.05-7.01 (m, 2H), 4.65 (hept,  $J$  = 7.1 Hz, 1H), 1.48 (d,  $J$  = 7.1 Hz, 6H), 1.35 (s, 6H); <sup>13</sup>C NMR (CDCl<sub>3</sub>, 75 MHz):  $\delta$  181.1, 141.8, 136.2, 127.7, 122.5, 122.3, 108.3, 44.2, 34.6, 24.5, 12.8.

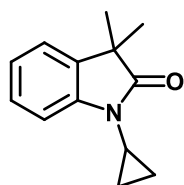

**1-cyclopropyl-3,3-dimethylindolin-2-one (2d).** yield: 74%, yellow oil. <sup>1</sup>H NMR (CDCl<sub>3</sub>, 300 MHz):  $\delta$  7.26 (t,  $J$  = 6.6 Hz, 1H), 7.18 (d,  $J$  = 7.2 Hz, 1H), 7.11 (d,  $J$  = 7.7 Hz, 1H), 7.05 (t,  $J$  = 7.5 Hz, 1H), 2.68-2.61 (m, 1H), 1.34 (s, 6H), 1.09-1.03 (m, 2H), 0.93-0.87 (m, 2H); <sup>13</sup>C NMR (CDCl<sub>3</sub>, 75 MHz):  $\delta$  182.2, 143.1, 135.6, 127.7, 122.5, 122.2, 109.5, 44.2, 24.6, 22.2, 6.1. IR (ATR): 2967, 1716, 1611, 1488, 1385, 1126, 821, 743, 754, 694. HRMS (ESI): found: 202.1234, calcd. for C<sub>13</sub>H<sub>16</sub>NO [M+H]<sup>+</sup>: 202.1226.

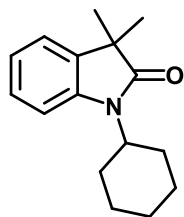

**1-cyclohexyl-3,3-dimethylindolin-2-one (2e).** yield: 80%, yellow solid.  $^1\text{H}$  NMR ( $\text{CDCl}_3$ , 300 MHz):  $\delta$  7.26-7.19 (m, 2H), 7.08-6.99 (m, 2H), 4.23-4.08 (m, 1H), 2.22-2.08 (m, 2H), 1.91-1.87 (m, 2H), 1.77-1.73 (m, 2H), 1.49-1.19 (m, 4H), 1.34 (s, 6H);  $^{13}\text{C}$  NMR ( $\text{CDCl}_3$ , 75 MHz):  $\delta$  181.3, 141.7, 136.4, 127.3, 122.6, 121.9, 110.2, 51.9, 43.8, 29.3, 26.1, 25.5, 24.6. IR (ATR): 2930, 2858, 1705, 1610, 1457, 1360, 1183, 755, 741. HRMS (ESI): found: 244.1700, calcd. for  $\text{C}_{16}\text{H}_{22}\text{NO}$   $[\text{M}+\text{H}]^+$ : 244.1696.

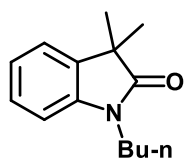

**1-butyl-3,3-dimethylindolin-2-one (2f).**<sup>2</sup> yield: 72%, yellow oil.  $^1\text{H}$  NMR ( $\text{CDCl}_3$ , 300 MHz):  $\delta$  7.27-7.19 (m, 2H), 7.04 (t,  $J = 7.4$  Hz, 1H), 6.86 (d,  $J = 7.7$  Hz, 1H), 3.71 (t,  $J = 7.2$  Hz, 2H), 1.71-1.61 (m, 2H), 1.44-1.26 (m, 2H), 1.36 (s, 6H), 0.95 (t,  $J = 7.3$  Hz, 3H);  $^{13}\text{C}$  NMR ( $\text{CDCl}_3$ , 75 MHz):  $\delta$  181.4, 142.1, 136.1, 127.6, 122.5, 122.3, 108.4, 44.2, 39.6, 29.6, 24.5, 20.2, 13.9.

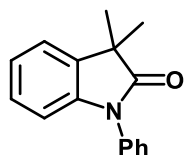

**3,3-dimethyl-1-phenylindolin-2-one (2g).**<sup>2</sup> yield: 84%, white solid.  $^1\text{H}$  NMR ( $\text{CDCl}_3$ , 300 MHz):  $\delta$  7.54-7.49 (m, 2H), 7.43-7.37 (m, 3H), 7.27 (d,  $J = 7.3$  Hz, 1H), 7.19 (td,  $J = 7.7, 1.1$  Hz, 1H), 7.09 (t,  $J = 7.2$  Hz, 1H), 6.85 (d,  $J = 7.7$  Hz, 1H), 1.49 (s, 6H);  $^{13}\text{C}$  NMR ( $\text{CDCl}_3$ , 75 MHz):  $\delta$  180.8, 142.6, 135.8, 134.8, 129.7, 128.0, 127.7, 126.7, 123.1, 122.7, 109.5, 44.4, 24.9.

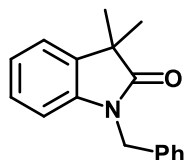

**1-benzyl-3,3-dimethylindolin-2-one (2h).**<sup>2</sup> yield: 61%, white solid.  $^1\text{H}$  NMR ( $\text{CDCl}_3$ , 300 MHz):  $\delta$  7.33-7.22 (m, 6H), 7.13 (t,  $J = 7.6$  Hz, 1H), 7.02 (t,  $J = 7.4$  Hz, 1H), 6.72 (d,  $J = 7.7$  Hz, 1H), 4.91 (s, 2H), 1.44 (s, 6H);  $^{13}\text{C}$  NMR ( $\text{CDCl}_3$ , 75 MHz):  $\delta$  181.6, 141.8, 136.2, 135.9, 128.9, 127.7, 127.6, 127.3, 122.6, 122.4, 109.2, 44.3, 43.6, 24.6.



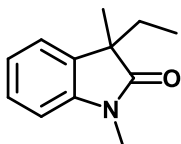

**3-ethyl-1,3-dimethylindolin-2-one (2i).**<sup>2</sup> yield: 85%, yellow oil. <sup>1</sup>H NMR (CDCl<sub>3</sub>, 300 MHz): δ 7.26 (t, *J* = 7.6 Hz, 1H), 7.17 (d, *J* = 7.1 Hz, 1H), 7.06 (t, *J* = 7.4 Hz, 1H), 6.84 (d, *J* = 7.7 Hz, 1H), 3.21 (s, 3H), 1.99-1.87 (m, 1H), 1.83-1.71 (m, 1H), 1.35 (s, 3H), 0.59 (t, *J* = 7.4 Hz, 3H); <sup>13</sup>C NMR (CDCl<sub>3</sub>, 75 MHz): δ 180.8, 143.6, 134.0, 127.7, 122.6, 122.5, 107.9, 49.0, 31.5, 26.1, 23.4, 8.9.

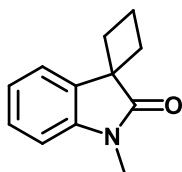

**1'-methylspiro[cyclobutane-1, 3'-indolin]-2'-one (2j).**<sup>3</sup> yield: 63%, yellow oil. <sup>1</sup>H NMR (CDCl<sub>3</sub>, 300 MHz): δ 7.51 (d, *J* = 7.2 Hz, 1H), 7.25 (td, *J* = 7.6, 0.8 Hz, 1H), 7.09 (t, *J* = 7.3 Hz, 1H), 6.78 (d, *J* = 7.7 Hz, 1H), 3.18 (s, 3H), 2.71-2.62 (m, 2H), 2.40-2.20 (m, 4H); <sup>13</sup>C NMR (CDCl<sub>3</sub>, 75 MHz): δ 180.3, 143.0, 134.5, 127.9, 122.6, 122.3, 107.7, 48.2, 31.4, 26.2, 16.9.

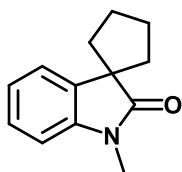

**1'-methylspiro[cyclopentane-1, 3'-indolin]-2'-one (2k).**<sup>3</sup> yield: 83%, yellow solid. <sup>1</sup>H NMR (CDCl<sub>3</sub>, 300 MHz): δ 7.26-7.18 (m, 2H), 7.04 (t, *J* = 7.4 Hz, 1H), 6.82 (d, *J* = 7.7 Hz, 1H), 3.20 (s, 3H), 2.17-1.81 (m, 8H); <sup>13</sup>C NMR (CDCl<sub>3</sub>, 75 MHz): δ 182.0, 143.0, 137.0, 127.4, 122.6, 122.3, 107.8, 54.0, 38.4, 26.7, 26.3.

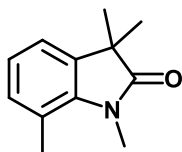

**1,3,3,7-tetramethylindolin-2-one (2l).**<sup>2</sup> yield: 77%, white solid. <sup>1</sup>H NMR (CDCl<sub>3</sub>, 300 MHz): δ 7.05-6.91 (m, 3H), 3.50 (s, 3H), 2.59 (s, 3H), 1.35 (s, 6H); <sup>13</sup>C NMR (CDCl<sub>3</sub>, 75 MHz): δ 182.2, 140.5, 136.6, 131.5, 122.5, 120.3, 119.8, 43.6, 29.6, 24.8, 19.2.

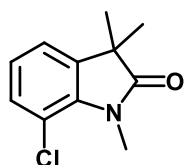

**7-chloro-1,3,3-trimethylindolin-2-one (2m).**<sup>1</sup> yield: 82%, white solid. <sup>1</sup>H NMR (CDCl<sub>3</sub>, 300 MHz): δ 7.18 (d, *J* = 8.1 Hz, 1H), 7.08 (d, *J* = 7.2 Hz, 1H), 6.96 (t, *J* = 7.8 Hz, 1H), 3.59 (s, 3H), 1.36 (s, 6H); <sup>13</sup>C NMR (CDCl<sub>3</sub>, 75 MHz): δ 181.6, 138.7, 138.6, 130.1, 123.4, 120.9, 115.6, 44.1, 29.7, 24.8.

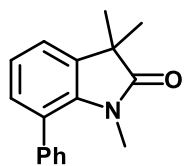

**1,3,3-trimethyl-7-phenylindolin-2-one (2n).**<sup>2</sup> yield: 63%, yellow solid. <sup>1</sup>H NMR (CDCl<sub>3</sub>, 300 MHz): δ 7.40-7.34 (m, 5H), 7.22-7.19 (m, 1H), 7.09-7.03 (m, 2H), 2.74 (s, 3H), 1.41 (s, 6H); <sup>13</sup>C NMR (CDCl<sub>3</sub>, 75 MHz): δ 182.5, 139.6, 139.2, 136.9, 130.8, 130.0, 127.9, 127.7, 125.5, 121.9, 121.4, 43.6, 30.2, 24.9.

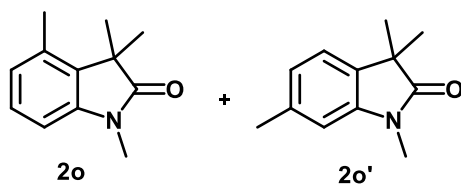

**1,3,3,4-tetramethylindolin-2-one (2o) and 1,3,3,6-tetramethylindolin-2-one (2o').**<sup>4</sup> **2o** : **2o'** = 1.8 : 1, total yield: 84%, yellow solid. <sup>1</sup>H NMR (CDCl<sub>3</sub>, 300 MHz): δ 7.16 (t, *J* = 7.8 Hz, 1H), 7.09 (d, *J* = 7.4 Hz, 0.6H), 6.88 (d, *J* = 7.6 Hz, 0.6H), 6.83 (d, *J* = 7.8 Hz, 1H), 6.71-6.68 (m, 1.5H), 3.20 (s, 4.7H), 2.40 (s, 3H), 2.39 (s, 1.6H), 1.45 (s, 6H), 1.35 (s, 3.3H); <sup>13</sup>C NMR (CDCl<sub>3</sub>, 75 MHz): δ 181.8, 181.4, 143.0, 142.8, 137.8, 134.1, 133.0, 132.6, 127.5, 125.1, 123.0, 122.0, 109.1, 105.8, 45.0, 44.0, 26.4, 26.2, 24.5, 22.4, 21.8, 18.2.

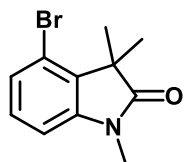

**4-bromo-1,3,3-trimethylindolin-2-one (2p).** yield: 58%, colorless oil. <sup>1</sup>H NMR (CDCl<sub>3</sub>, 300 MHz): δ 7.18-7.10 (m, 2H), 6.79 (dd, *J* = 7.2, 1.1 Hz, 1H), 3.21 (s, 3H), 1.52 (s, 6H); <sup>13</sup>C NMR (CDCl<sub>3</sub>, 75 MHz): δ 180.9, 144.8, 133.4, 129.2, 126.9, 118.9, 107.2, 46.6, 26.5, 21.5.

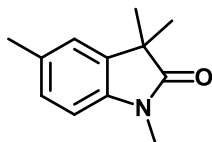

**1, 3, 3, 5-tetramethylindolin-2-one (2q).**<sup>2</sup> yield: 81%, yellow solid. <sup>1</sup>H NMR (CDCl<sub>3</sub>, 300 MHz): δ 7.06-7.02 (m, 2H), 6.73 (d, *J* = 7.8 Hz, 1H), 3.19 (s, 3H), 2.34 (s, 3H), 1.35 (s, 6H); <sup>13</sup>C NMR (CDCl<sub>3</sub>, 75 MHz): δ 181.4, 140.3, 136.0, 132.1, 127.9, 123.2, 107.8, 44.3, 26.3, 24.5, 21.2.

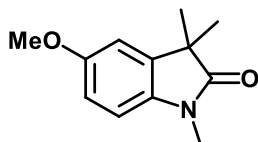

**5-methoxy-1, 3, 3-trimethylindolin-2-one (2r).**<sup>2</sup> yield: 75%, colorless oil. <sup>1</sup>H NMR (CDCl<sub>3</sub>, 300 MHz): δ 6.82 (d, *J* = 1.9 Hz, 1H), 6.77-6.72 (m, 2H), 3.80 (s, 3H), 3.19 (s, 3H), 1.36 (s, 6H); <sup>13</sup>C NMR (CDCl<sub>3</sub>, 75 MHz): δ 181.2, 156.2, 137.4, 136.3, 111.7, 110.2, 108.3, 56.0, 44.8, 26.4, 24.5.

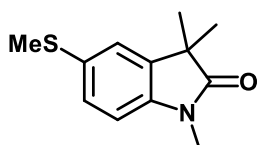

**1, 3, 3-trimethyl-5-(methylthio)indolin-2-one (2s).** yield: 73%, yellow solid. <sup>1</sup>H NMR (CDCl<sub>3</sub>, 300 MHz): δ 7.25-7.20 (m, 2H), 6.79 (d, *J* = 8.0 Hz, 1H), 3.20 (s, 3H), 2.48 (s, 3H), 1.37 (s, 6H); <sup>13</sup>C NMR (CDCl<sub>3</sub>, 75 MHz): δ 181.1, 141.1, 136.8, 131.4, 128.0, 123.2, 108.6, 44.4, 26.4, 24.4, 18.1. IR (ATR): 2967, 1705, 1608, 1489, 1344, 1243, 1128, 806, 544. HRMS (ESI): found: 222.0952, calcd. for C<sub>12</sub>H<sub>16</sub>NOS [M+H]<sup>+</sup>: 222.0947.

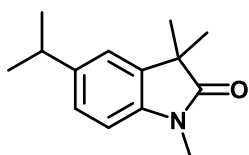

**5-isopropyl-1, 3, 3-trimethylindolin-2-one (2t).**<sup>2</sup> yield: 58%, white solid. <sup>1</sup>H NMR (CDCl<sub>3</sub>, 300 MHz): δ 7.12 (d, *J* = 8.0 Hz, 1H), 7.08 (s, 1H), 6.77 (d, *J* = 7.9 Hz, 1H), 3.20 (s, 3H), 2.91 (hept, *J* = 6.8 Hz, 1H), 1.37 (s, 6H), 1.26 (d, *J* = 6.9 Hz, 6H); <sup>13</sup>C NMR (CDCl<sub>3</sub>, 75 MHz): δ 181.6, 143.5, 140.7, 136.0, 125.3, 120.6, 107.8, 44.4, 34.1, 26.3, 24.5, 24.4.

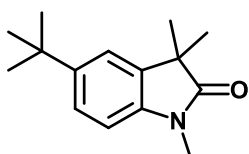

**5-(tert-butyl)-1, 3, 3-trimethylindolin-2-one (2u).**<sup>2</sup> yield: 63%, white solid. <sup>1</sup>H NMR (CDCl<sub>3</sub>, 300 MHz): δ 7.29 (dd, *J* = 8.1, 1.8 Hz, 1H), 7.24 (d, *J* = 1.6 Hz, 1H), 6.78 (d, *J* = 8.1 Hz, 1H), 3.20 (s, 3H), 1.38 (s, 6H), 1.33 (s, 9H); <sup>13</sup>C NMR (CDCl<sub>3</sub>, 75 MHz): δ 181.7, 145.9, 140.4, 135.7, 124.3, 119.5, 107.5, 44.5, 34.7, 31.8, 26.3, 24.6.

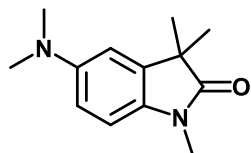

**5-(dimethylamino)-1, 3, 3-trimethylindolin-2-one (2v).**<sup>4</sup> yield: 88%, yellow oil. <sup>1</sup>H NMR (CDCl<sub>3</sub>, 300 MHz): δ 6.75-6.72 (m, 2H), 6.64 (dd, *J* = 8.5, 2.3 Hz, 1H), 3.18 (s, 3H), 2.91 (s, 6H), 1.37 (s, 6H); <sup>13</sup>C NMR (CDCl<sub>3</sub>, 75 MHz): δ 181.0, 147.8, 137.0, 133.8, 111.9, 109.2, 108.4, 44.7, 41.8, 26.3, 24.6.

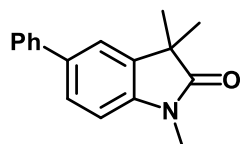

**1, 3, 3-trimethyl-5-phenylindolin-2-one (2w).**<sup>2</sup> yield: 91%, yellow oil. <sup>1</sup>H NMR (CDCl<sub>3</sub>, 300 MHz): δ 7.56 (d, *J* = 7.4 Hz, 2H), 7.50-7.40 (m, 4H), 7.31 (t, *J* = 7.2 Hz, 1H), 6.90 (d, *J* = 8.0 Hz, 1H), 3.23 (s, 3H), 1.42 (s, 6H); <sup>13</sup>C NMR (CDCl<sub>3</sub>, 75 MHz): δ 181.4, 142.1, 141.1, 136.5, 136.1, 128.9, 127.0, 126.9, 126.6, 121.3, 108.3, 44.4, 26.4, 24.5.

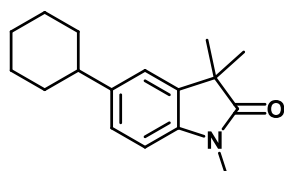

**5-cyclohexyl-1, 3, 3-trimethylindolin-2-one (2x).** yield: 74%, white solid. <sup>1</sup>H NMR (CDCl<sub>3</sub>, 300 MHz): δ 7.10 (d, *J* = 8.0 Hz, 1H), 7.07 (s, 1H), 6.77 (d, *J* = 7.9 Hz, 1H), 3.19 (s, 3H), 2.52-2.45 (m, 1H), 1.88-1.77 (m, 6H), 1.48-1.15 (m, 4H), 1.36 (s, 6H); <sup>13</sup>C NMR (CDCl<sub>3</sub>, 75 MHz): δ 181.6, 142.8, 140.7, 135.9, 125.7, 121.0, 107.8, 44.5, 44.4, 35.0, 27.0, 26.3, 26.2, 24.6. IR (ATR): 2923, 2850, 1709, 1620, 1494, 1350, 1247, 1064, 810, 731. HRMS (ESI): found: 258.1862, calcd. for C<sub>17</sub>H<sub>24</sub>NO [M+H]<sup>+</sup>: 258.1852.

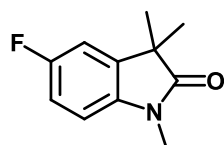

**5-fluoro-1, 3, 3-trimethylindolin-2-one (2y).**<sup>2</sup> yield: 62%, yellow solid. <sup>1</sup>H NMR (CDCl<sub>3</sub>, 300

MHz):  $\delta$  6.99-6.94 (m, 2H), 6.78-6.74 (m, 1H), 3.21 (s, 3H), 1.37 (s, 6H);  $^{19}\text{F}$  NMR ( $\text{CDCl}_3$ , 282 MHz):  $\delta$  -120.9 (m, 1F);  $^{13}\text{C}$  NMR ( $\text{CDCl}_3$ , 75 MHz):  $\delta$  181.1, 159.53 (d,  $J_{1\text{F}} = 238.8$ ), 138.6, 137.6 (d,  $J_{3\text{F}} = 7.8$ ), 113.8 (d,  $J_{2\text{F}} = 23.3$ ), 110.7 (d,  $J_{2\text{F}} = 24.4$ ), 108.6 (d,  $J_{3\text{F}} = 8.1$ ), 44.8, 26.5, 24.4.

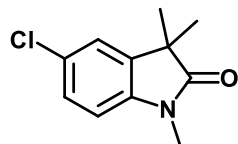

**5-chloro-1, 3, 3-trimethylindolin-2-one (2z).**<sup>3</sup> yield: 87%, yellow solid.  $^1\text{H}$  NMR ( $\text{CDCl}_3$ , 300 MHz):  $\delta$  7.23 (dd,  $J = 8.2, 2.0$  Hz, 1H), 7.18 (d,  $J = 1.9$  Hz, 1H), 6.77 (d,  $J = 8.2$  Hz, 1H), 3.21 (s, 3H), 1.37 (s, 6H);  $^{13}\text{C}$  NMR ( $\text{CDCl}_3$ , 75 MHz):  $\delta$  180.9, 141.3, 137.5, 127.9, 127.6, 123.0, 109.0, 44.5, 26.4, 24.3.

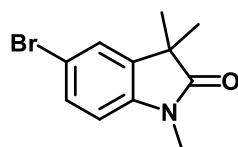

**5-bromo-1, 3, 3-trimethylindolin-2-one (2ab).**<sup>3</sup> yield: 52%, white solid.  $^1\text{H}$  NMR ( $\text{CDCl}_3$ , 300 MHz):  $\delta$  7.38 (dd,  $J = 8.2, 1.8$  Hz, 1H), 7.31 (d,  $J = 1.5$  Hz, 1H), 6.72 (d,  $J = 8.2$  Hz, 1H), 3.20 (s, 3H), 1.36 (s, 6H);  $^{13}\text{C}$  NMR ( $\text{CDCl}_3$ , 75 MHz):  $\delta$  180.8, 141.8, 138.0, 130.6, 125.8, 115.3, 109.6, 44.6, 26.4, 24.4.

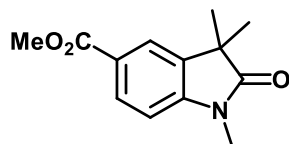

**methyl 1, 3, 3-trimethyl-2-oxindoline-5-carboxylate (2ac).**<sup>3</sup> yield: 73%, yellow solid.  $^1\text{H}$  NMR ( $\text{CDCl}_3$ , 300 MHz):  $\delta$  8.02 (dd,  $J = 8.2, 1.2$  Hz, 1H), 7.89 (s, 1H), 6.89 (d,  $J = 8.2$  Hz, 1H), 3.92 (s, 3H), 3.26 (s, 3H), 1.40 (s, 6H);  $^{13}\text{C}$  NMR ( $\text{CDCl}_3$ , 75 MHz):  $\delta$  181.7, 167.0, 146.9, 135.8, 130.6, 124.5, 123.7, 107.6, 52.1, 44.1, 26.5, 24.3.

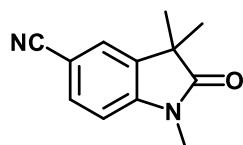

**1, 3, 3-trimethyl-2-oxindoline-5-carbonitrile (2ad).**<sup>3</sup> yield: 84%, white solid.  $^1\text{H}$  NMR ( $\text{CDCl}_3$ , 300 MHz):  $\delta$  7.61 (dd,  $J = 8.1, 1.3$  Hz, 1H), 7.46 (s, 1H), 6.93 (d,  $J = 8.1$  Hz, 1H), 3.26 (s, 3H), 1.40 (s, 6H);  $^{13}\text{C}$  NMR ( $\text{CDCl}_3$ , 75 MHz):  $\delta$  181.0, 146.6, 136.8, 133.2, 125.8, 119.3, 108.6, 105.6, 44.1, 26.5, 24.2.

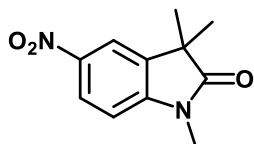

**1, 3, 3-trimethyl-5-nitroindolin-2-one (2ae).**<sup>4</sup> yield: 68%, yellow solid. <sup>1</sup>H NMR (CDCl<sub>3</sub>, 300 MHz): δ 8.26 (dd, *J* = 8.6, 2.2 Hz, 1H), 8.11 (d, *J* = 2.1 Hz, 1H), 6.95 (d, *J* = 8.6 Hz, 1H), 3.30 (s, 3H), 1.44 (s, 6H); <sup>13</sup>C NMR (CDCl<sub>3</sub>, 75 MHz): δ 181.3, 148.5, 143.6, 136.6, 125.3, 118.4, 107.7, 44.3, 26.7, 24.2.

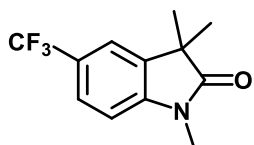

**1, 3, 3-trimethyl-5-(trifluoromethyl)indolin-2-one (2af).**<sup>3</sup> yield: 68%, yellow solid. <sup>1</sup>H NMR (CDCl<sub>3</sub>, 300 MHz): δ 7.56 (d, *J* = 8.1 Hz, 1H), 7.44 (s, 1H), 6.93 (d, *J* = 8.2 Hz, 1H), 3.26 (s, 3H), 1.40 (s, 6H); <sup>19</sup>F NMR (CDCl<sub>3</sub>, 282 MHz): δ -61.4 (m, 1F); <sup>13</sup>C NMR (CDCl<sub>3</sub>, 75 MHz): δ 181.3, 145.8, 136.4, 125.7 (q, *J*<sub>3F</sub> = 4.0), 124.9 (q, *J*<sub>2F</sub> = 32.3), 124.6 (q, *J*<sub>3F</sub> = 269.8), 119.5 (q, *J*<sub>3F</sub> = 3.6), 107.9, 44.3, 26.5, 24.3.

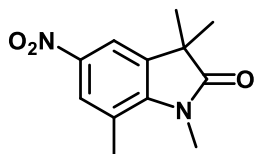

**1, 3, 3, 7-tetramethyl-5-nitroindolin-2-one (2ag).** yield: 49%, yellow solid. <sup>1</sup>H NMR (CDCl<sub>3</sub>, 300 MHz): δ 7.98 (s, 1H), 7.92 (s, 1H), 3.56 (s, 3H), 2.69 (s, 3H), 1.40 (s, 6H); <sup>13</sup>C NMR (CDCl<sub>3</sub>, 75 MHz): δ 182.2, 146.5, 143.0, 137.3, 127.9, 120.2, 116.2, 43.6, 29.7, 24.6, 19.3.

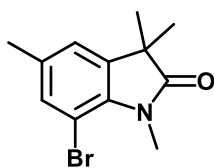

**7-bromo-1, 3, 3, 5-tetramethylindolin-2-one (2ah).** yield: 84%, yellow solid. <sup>1</sup>H NMR (CDCl<sub>3</sub>, 300 MHz): δ 7.17 (s, 1H), 6.93 (s, 1H), 3.57 (s, 3H), 2.30 (s, 3H), 1.34 (s, 6H); <sup>13</sup>C NMR (CDCl<sub>3</sub>, 75 MHz): δ 181.7, 138.9, 137.6, 133.7, 133.3, 122.5, 102.0, 44.1, 29.8, 24.8, 20.6. IR (ATR): 2969, 1717, 1570, 1468, 1336, 1252, 1066, 853, 789, 743. HRMS (ESI): found: 268.0334, calcd. for C<sub>12</sub>H<sub>15</sub>BrNO (M<sup>+</sup>): 268.0332.

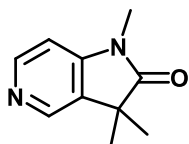

**1, 3, 3-trimethyl-1,3-dihydro-2H-pyrrolo[3, 2-c]pyridin-2-one (2ai).**<sup>5</sup> yield: 51%, colorless oil. <sup>1</sup>H NMR (CDCl<sub>3</sub>, 300 MHz): δ 8.47 (d, *J* = 5.3 Hz, 1H), 8.34 (s, 1H), 6.82 (d, *J* = 5.3 Hz, 1H), 3.23 (s, 3H), 1.43 (s, 6H); <sup>13</sup>C NMR (CDCl<sub>3</sub>, 75 MHz): δ 181.2, 150.1, 149.7, 142.8, 131.3, 103.9, 43.1, 26.4, 24.3.

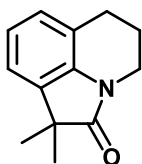

**1, 1-dimethyl-5, 6-dihydro-4H-pyrrolo[3, 2, 1-ij]quinolin-2(1H)-one (2aj).**<sup>2</sup> yield: 81%, yellow oil. <sup>1</sup>H NMR (CDCl<sub>3</sub>, 300 MHz): δ 7.05-6.92 (m, 3H), 3.72 (t, *J* = 5.8 Hz, 2H), 2.79 (t, *J* = 6.0 Hz, 2H), 2.01 (quint, *J* = 5.9 Hz, 2H), 1.38 (s, 6H); <sup>13</sup>C NMR (CDCl<sub>3</sub>, 75 MHz): δ 180.4, 138.5, 134.5, 126.5, 122.0, 120.2, 120.1, 45.6, 38.9, 24.7, 24.3, 21.3.

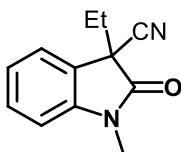

**3-ethyl-1-methyl-2-oxoindoline-3-carbonitrile (2ak).**<sup>6</sup> yield: 58%, colorless oil. <sup>1</sup>H NMR (CDCl<sub>3</sub>, 300 MHz): δ 7.43-7.38 (m, 2H), 7.17 (t, *J* = 7.5 Hz, 1H), 6.90 (d, *J* = 8.0 Hz, 1H), 3.26 (s, 3H), 2.31-2.07 (m, 2H), 0.99 (t, *J* = 7.4 Hz, 3H); <sup>13</sup>C NMR (CDCl<sub>3</sub>, 75 MHz): δ 170.7, 143.3, 130.4, 125.4, 124.3, 123.8, 117.2, 109.1, 47.2, 31.0, 27.0, 8.5.

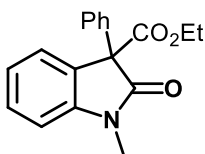

**ethyl 1-methyl-2-oxo-3-phenylindoline-3-carboxylate (2al).**<sup>7</sup> yield: 40%, yellow solid. <sup>1</sup>H NMR (CDCl<sub>3</sub>, 300 MHz): δ 7.46 (d, *J* = 7.6 Hz, 1H), 7.40 (t, *J* = 7.8 Hz, 1H), 7.32 (s, 5H), 7.16 (t, *J* = 7.5 Hz, 1H), 6.93 (d, *J* = 7.9 Hz, 1H), 4.30-4.14 (m, 2H), 3.23 (s, 3H), 1.20 (t, *J* = 7.1 Hz, 3H); <sup>13</sup>C NMR (CDCl<sub>3</sub>, 75 MHz): δ 172.9, 169.3, 144.5, 136.1, 129.7, 128.6, 128.3, 128.0, 127.2, 126.1, 123.0, 108.8, 64.2, 62.4, 26.9, 14.1.

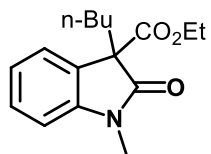

**ethyl 3-butyl-1-methyl-2-oxoindoline-3-carboxylate (2am).** yield: 34%, colorless oil.  $^1\text{H}$  NMR ( $\text{CDCl}_3$ , 300 MHz):  $\delta$  7.32 (t,  $J = 7.7$  Hz, 1H), 7.26-7.24 (m, 1H), 7.07 (t,  $J = 7.5$  Hz, 1H), 6.85 (d,  $J = 7.8$  Hz, 1H), 4.18-4.07 (m, 2H), 3.25 (s, 3H), 2.31-2.13 (m, 2H), 1.25-1.22 (m, 4H), 1.16 (t,  $J = 7.1$  Hz, 3H), 7.32 (t,  $J = 7.3$  Hz, 3H);  $^{13}\text{C}$  NMR ( $\text{CDCl}_3$ , 75 MHz):  $\delta$  174.5, 169.7, 144.3, 129.0, 128.5, 123.5, 122.9, 108.3, 61.9, 59.7, 34.1, 26.6, 25.8, 22.8, 14.1, 13.9. IR (ATR): 2926, 1717, 1611, 1493, 1348, 1226, 1080, 964, 749. HRMS (ESI): found: 276.1600, calcd. for  $\text{C}_{16}\text{H}_{22}\text{NO}_3$   $[\text{M}+\text{H}]^+$ : 276.1594.



## Diversity of the products

### (a) Demethylation <sup>8</sup>

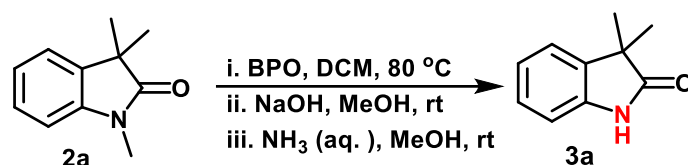

A solution of oxindole **2a** (1 mmol, 175 mg) and benzoyl peroxide (2.0 equiv.) in dry DCM (2 mL) in a sealed tube was heated slowly to 80 °C. After stirring for 18 h, the reaction mixture was cooled to rt and the solvent was evaporated. The residue was dissolved in MeOH (4 mL), NaOH (3.65 mmol, 146 mg) was added and the reaction mixture was stirred at rt for 18 h. Then the slurry was poured into saturated aqueous NH<sub>4</sub>Cl (10 mL) and extracted with DCM (3\*6 mL). The combined organic layers were dried by anhydrous Na<sub>2</sub>SO<sub>4</sub> and concentrated. The residue was dissolved in a methanolic NH<sub>3</sub> solution (5 mL, 7M) and stirred for 19 h at rt. After reaction, the mixture was extracted by EtOAc (3\*10 mL) and dried by anhydrous Na<sub>2</sub>SO<sub>4</sub> and concentrated, purified by silica gel flash chromatography using Petroleum ether/EtOAc (30:1 to 2:1) to afford the desired product **3a** as a white solid.

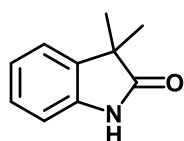

**3, 3-dimethylindolin-2-one (3a).**<sup>8</sup> yield: 70%, white solid. <sup>1</sup>H NMR (CDCl<sub>3</sub>, 300 MHz): δ 9.71 (s, 1H), 7.21-7.16 (m, 2H), 7.05-6.97 (m, 2H), 1.41 (s, 6H); <sup>13</sup>C NMR (CDCl<sub>3</sub>, 75 MHz): δ 184.9, 140.2, 136.4, 127.7, 122.6, 122.5, 110.2, 44.9, 24.4.

### (b) Synthesis of the indoline-2-thione <sup>9</sup>

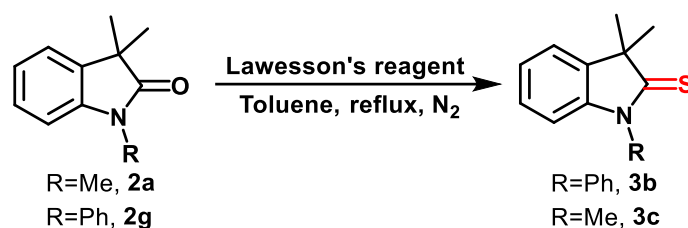

Oxindoles (**2a** or **2g**, 1 mmol) and Lawesson's reagent (0.51 equiv.) were added into a test tube under N<sub>2</sub>. Then dry toluene (2 mL) was added by syringe. It was sealed and refluxed for 1.5-2 h. After cooling down, the mixture was poured into water. The organic layer was separated and the aqueous layer was extracted with ether. The organic layers were combined, washed with brine, dried over Na<sub>2</sub>SO<sub>4</sub>, concentrated in vacuo and finally purified by silica gel chromatography eluting with EtOAc/PE (1:40) to afford the product **3b-c**.

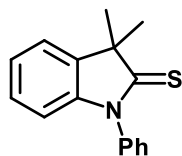

**3, 3-dimethyl-1-phenylindoline-2-thione (3b).**<sup>9</sup> yield: 96%, white solid. <sup>1</sup>H NMR (CDCl<sub>3</sub>, 300 MHz): δ 7.61-7.48 (m, 3H), 7.40-7.36 (m, 3H), 7.21-7.19 (m, 2H), 6.71-6.68 (m, 1H), 1.57 (s, 6H); <sup>13</sup>C NMR (CDCl<sub>3</sub>, 75 MHz): δ 213.8, 145.1, 140.3, 137.1, 130.0, 129.2, 127.8, 127.7, 124.4, 123.0, 110.7, 55.4, 28.7.

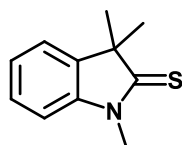

**1, 3, 3-trimethylindoline-2-thione (3c).**<sup>10</sup> yield: 50%, colorless oil. <sup>1</sup>H NMR (CDCl<sub>3</sub>, 300 MHz): δ 7.35-7.30 (m, 2H), 7.19 (t, *J* = 7.5 Hz, 1H), 7.05 (d, *J* = 7.9 Hz, 1H), 3.65 (s, 3H), 1.44 (s, 6H); <sup>13</sup>C NMR (CDCl<sub>3</sub>, 75 MHz): δ 211.9, 143.9, 140.3, 127.8, 124.2, 122.7, 109.6, 54.9, 31.5, 28.0.

### (c) Reduction of amide <sup>11</sup>

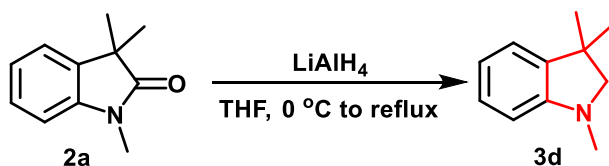

In a flame-dried Schlenktube, oxindole **2a** was dissolved in anhydrous THF (5 mL), LiAlH<sub>4</sub> (1 mmol, 175 mg) was then added slowly at 0 °C under N<sub>2</sub>. The reaction was then heated to reflux overnight. After cooling to room temperature, the reaction was quenched with a saturated solution of NH<sub>4</sub>Cl. The reaction was then extracted with ether three times. The combined organic extracts were washed with brine, dried with MgSO<sub>4</sub>, filtrated and concentrated *in vacuo*. The product was purified by flash column chromatography (20:1, PE/Et<sub>2</sub>O) to yield **3d** as a colorless oil.

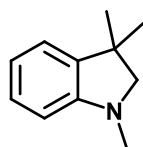

**1, 3, 3-trimethylindoline (3d).**<sup>11</sup> yield: 98%, volatile colorless oil. <sup>1</sup>H NMR (CDCl<sub>3</sub>, 300 MHz): δ 7.09 (t, *J* = 7.5 Hz, 1H), 7.01 (d, *J* = 7.2 Hz, 1H), 6.70 (t, *J* = 7.3 Hz, 1H), 6.49 (d, *J* = 7.8 Hz, 1H), 3.06 (s, 2H), 2.75 (s, 3H), 1.30 (s, 6H); <sup>13</sup>C NMR (CDCl<sub>3</sub>, 75 MHz): δ 151.9, 139.0, 127.4, 121.4, 117.9, 107.2, 70.2, 40.1, 35.8, 27.3.

#### (d) C–H alkenylation <sup>12</sup>

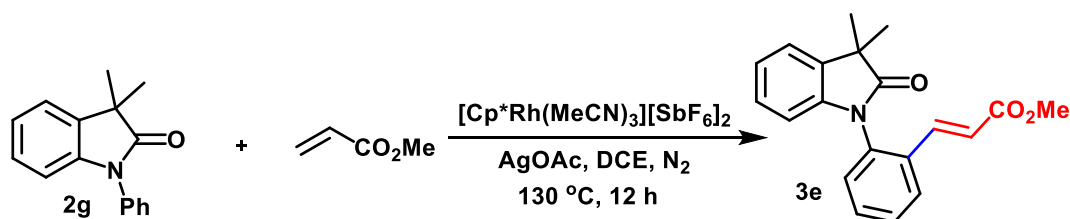

Oxindole **2g** (0.3 mmol, 71.2 mg), methyl acrylate (81.6  $\mu\text{L}$ , 2.5 equiv.),  $[\text{Cp}^*\text{Rh}(\text{MeCN})_3][\text{SbF}_6]_2$  (12.6 mg, 5 mol %),  $\text{AgOAc}$  (50.4 mg, 1 equiv.) were stirred in  $\text{DCE}$  (2.0 mL) at  $130\text{ }^\circ\text{C}$  for 12 h. After completion, the reaction mixture was purified by flash chromatography eluting with ethyl acetate and petroleum ether (1:40 to 1:10) to give the product **3e** as a white solid.

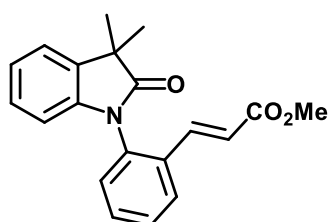

**methyl (E)-3-(2-(3,3-dimethyl-2-oxindolin-1-yl)phenyl)acrylate (3e).**<sup>12</sup> yield: 86%, yellow solid.  $^1\text{H}$  NMR ( $\text{CDCl}_3$ , 300 MHz):  $\delta$  7.80 (d,  $J = 7.2$  Hz, 1H), 7.56–7.45 (m, 3H), 7.35–7.29 (m, 2H), 7.18–7.07 (m, 2H), 6.50 (d,  $J = 7.2$  Hz, 1H), 6.43 (d,  $J = 16.0$  Hz, 1H), 3.69 (s, 3H), 1.57 (s, 3H), 1.52 (s, 3H);  $^{13}\text{C}$  NMR ( $\text{CDCl}_3$ , 75 MHz):  $\delta$  181.0, 166.8, 142.8, 139.3, 135.6, 134.1, 133.0, 131.4, 129.3, 128.9, 127.8, 127.8, 123.3, 122.8, 120.3, 109.4, 51.7, 44.6, 25.5, 24.1.

#### (e) C–H arylation <sup>13</sup>

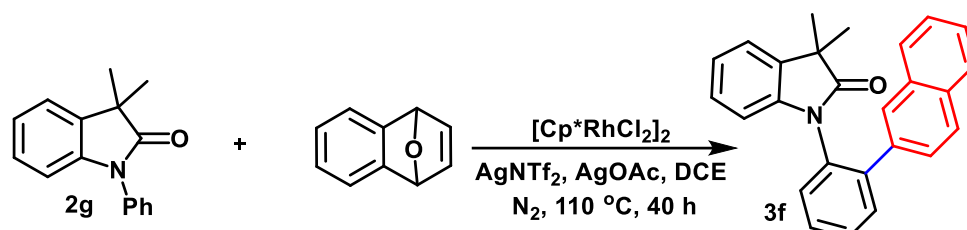

Under  $\text{N}_2$  atmosphere, to a 15 mL oven-dried screw-top pressure reaction tube equipped with a magnetic stirring bar were added oxindole **2g** (1.2 equiv, 57.0 mg), 1,4-dihydro-1,4-epoxynaphthalene (0.2 mmol, 28.8 mg),  $[\text{Cp}^*\text{RhCl}_2]_2$  (5 mol %, 6.2 mg),  $\text{AgNTf}_2$  (40 mol %, 31.0 mg),  $\text{AgOAc}$  (0.9 equiv, 30.0 mg) and anhydrous  $\text{DCE}$  (2.0 mL). The reaction tube was sealed with a screw teflon cap. After stirring at  $110\text{ }^\circ\text{C}$  for 40 h, the reaction mixture was diluted with  $\text{EtOAc}$ , dried with  $\text{MgSO}_4$ , filtered, and concentrated. The residue was purified by flash chromatography on silica gel (petroleum ether/ $\text{EtOAc}$  = 40:1 to 20:1 as eluent) to afford the desired product **3f** as a colorless oil.

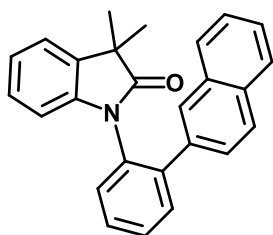

**3, 3-dimethyl-1-(2-(naphthalen-2-yl)phenyl)indolin-2-one (3f).**<sup>13</sup> yield: 46%, colorless oil. <sup>1</sup>H NMR (CDCl<sub>3</sub>, 300 MHz): 7.74-7.53 (m, 7H), 7.41-7.38 (m, 4H), 7.09-7.03 (m, 2H), 6.94 (t, *J* = 7.2 Hz, 1H), 6.53 (d, *J* = 7.6 Hz, 1H), 1.39 (s, 3H), 1.00 (s, 3H); <sup>13</sup>C NMR (CDCl<sub>3</sub>, 75 MHz): δ 181.1, 143.2, 141.7, 136.3, 135.5, 133.2, 132.6, 132.5, 131.7, 129.4, 129.3, 129.1, 128.2, 127.9, 127.7, 127.6, 127.4, 126.7, 126.2, 126.1, 122.7, 122.4, 109.4, 44.3, 24.7, 24.1.

**(f) C–H activation and cascade cyclization**<sup>9</sup>

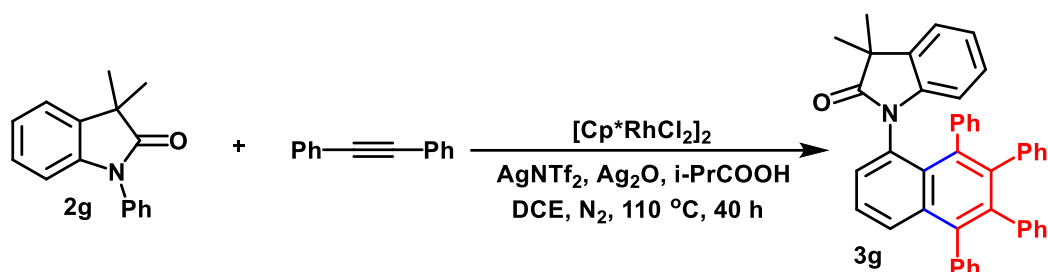

Under N<sub>2</sub> atmosphere, to a 15 mL tube were added oxindole **2g** (0.2 mmol, 47.5 mg), diphenylacetylene (2.2 equiv, 78.4 mg), [Cp\*RhCl<sub>2</sub>]<sub>2</sub> (5 mol %, 6.2 mg), AgNTf<sub>2</sub> (40 mol %, 31.0 mg), Ag<sub>2</sub>O (1.1 equiv, 51.0 mg) and DCE (anhydrous, 1.5 mL). Then *i*-PrCOOH (2.2 equiv, 41.0 μL) was added at room temperature. After stirring at 100 °C for 40 h, the reaction mixture was diluted with EtOAc, dried with MgSO<sub>4</sub>, filtered, and concentrated. The residue was purified by flash chromatography on silica gel (petroleum ether/EtOAc = 40:1 to 20:1 as the eluent) to afford the desired product **3g** as a white solid.

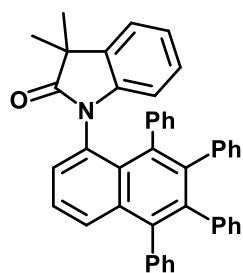

**3, 3-dimethyl-1-(5, 6, 7, 8-tetraphenylnaphthalen-1-yl)indolin-2-one (3g).**<sup>9</sup> yield: 59%, white solid. <sup>1</sup>H NMR (CDCl<sub>3</sub>, 300 MHz): 7.79 (d, *J* = 8.3 Hz, 1H), 7.46 (t, *J* = 7.5 Hz, 1H), 7.36-7.20 (m, 6H), 7.11-7.06 (m, 2H), 6.96-6.59 (m, 15H), 6.49 (d, *J* = 7.7 Hz, 1H), 6.36 (t, *J* = 7.4 Hz, 1H), 1.26 (s, 3H), 0.88 (s, 3H); <sup>13</sup>C NMR (CDCl<sub>3</sub>, 75 MHz): δ 181.0, 144.3, 142.2, 140.5, 140.3, 140.0, 139.8, 139.3, 135.9, 135.7, 134.5, 133.1, 131.5, 131.3, 131.1, 130.4, 130.2, 129.3, 129.0, 127.8, 127.7, 126.9, 126.7, 126.6, 126.4, 126.2, 126.1, 125.9, 125.5, 125.1, 122.4, 121.7, 110.7, 44.0, 27.4, 23.2.

### (g) Bromination <sup>9</sup>

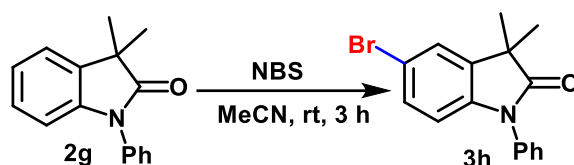

To a Schlenktube were added 3,3-dimethyl-1-phenylindolin-2-one (1 mmol, 237.3mg), *N*-Bromosuccinimide (NBS) (1.1 equiv, 195.8 mg) and CH<sub>3</sub>CN (10 mL). The reaction mixture was stirred at room temperature for 3 h. Concentration of the reaction mixture in vacuo followed by silica gel chromatography eluting with EtOAc/PE (1:20) afforded the *N*-phenyl oxindole **3h** as a white solid.

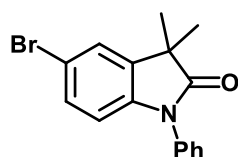

**5-bromo-3,3-dimethyl-1-phenylindolin-2-one (3h).**<sup>9</sup> yield: 99%, white solid. <sup>1</sup>H NMR (CDCl<sub>3</sub>, 300 MHz): δ 7.52 (t, *J* = 7.4 Hz, 2H), 7.43-7.38 (m, 4H), 7.30 (dd, *J* = 8.3, 1.9 Hz, 1H), 6.73 (d, *J* = 8.3 Hz, 1H), 1.48 (s, 6H); <sup>13</sup>C NMR (CDCl<sub>3</sub>, 75 MHz): δ 180.1, 141.7, 137.8, 134.4, 130.6, 129.8, 128.3, 126.5, 126.1, 115.7, 111.0, 44.6, 24.8.

### (h) Dichlorination <sup>14</sup>

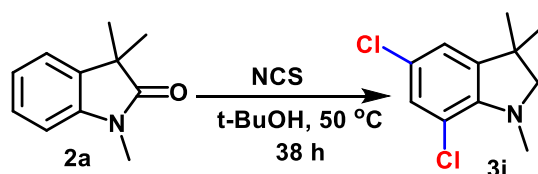

Oxindole **2a** (1.0 mmol, 175 mg) was dissolved in 80% *t*-BuOH ( 2.0 mL), and NCS (1.6 equiv., 214 mg) was added to this solution. The mixture was stirred for 38 h at 50 °C. Then allowed to cool to room temperature, diluted with water and extracted with ether, dried with MgSO<sub>4</sub>, filtered and concentrated. The residue was purified by flash chromatography on silica gel (petroleum ether/EtOAc = 40:1 to 20:1 as the eluent) to afford the desired product **3i** as a white solid.

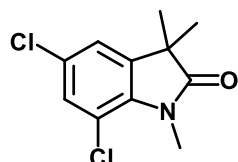

**5,7-dichloro-1,3,3-trimethylindolin-2-one (3i).**<sup>14</sup> yield: 59%, white solid. <sup>1</sup>H NMR (CDCl<sub>3</sub>, 300 MHz): δ 7.20 (d, *J* = 1.8 Hz, 1H), 7.06 (d, *J* = 1.8 Hz, 1H), 3.56 (s, 3H), 1.36 (s, 6H); <sup>13</sup>C NMR (CDCl<sub>3</sub>, 75 MHz): δ 181.1, 139.9, 137.5, 129.5, 128.1, 121.7, 115.9, 44.4, 29.6, 24.6.

### (i) Nitration <sup>15</sup>

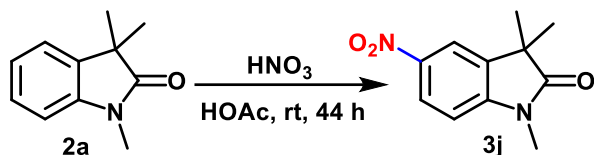

Nitric acid (65%; 329  $\mu$ L, 1.1 equiv) was added dropwise to oxindole **2a** (526 mg, 3.0 mmol) in acetic acid (5.1 mL) at room temperature. After 44 h, diluted with water and extracted with EtOAc, dried with  $\text{MgSO}_4$ , filtered and concentrated. The residue was purified by flash chromatography on silica gel (petroleum ether/EtOAc = 20:1 to 4:1 as the eluent) to afford the desired product **3j** as a yellow solid.

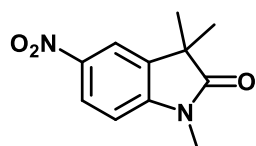

**1, 3, 3-trimethyl-5-nitroindolin-2-one (3j)**.<sup>15</sup> yield: 80%, yellow solid.  $^1\text{H}$  NMR ( $\text{CDCl}_3$ , 300 MHz):  $\delta$  8.26 (dd,  $J$  = 8.6, 1.8 Hz, 1H), 8.10 (d,  $J$  = 1.8 Hz, 1H), 6.95 (d,  $J$  = 8.6 Hz, 1H), 3.30 (s, 3H), 1.44 (s, 6H);  $^{13}\text{C}$  NMR ( $\text{CDCl}_3$ , 75 MHz):  $\delta$  181.4, 148.5, 143.6, 136.6, 125.3, 118.4, 107.7, 44.3, 26.7, 24.2.

### (j) Synthesis of analogue of *anti-anxiety* treatment drug Ziprasidone <sup>16</sup>

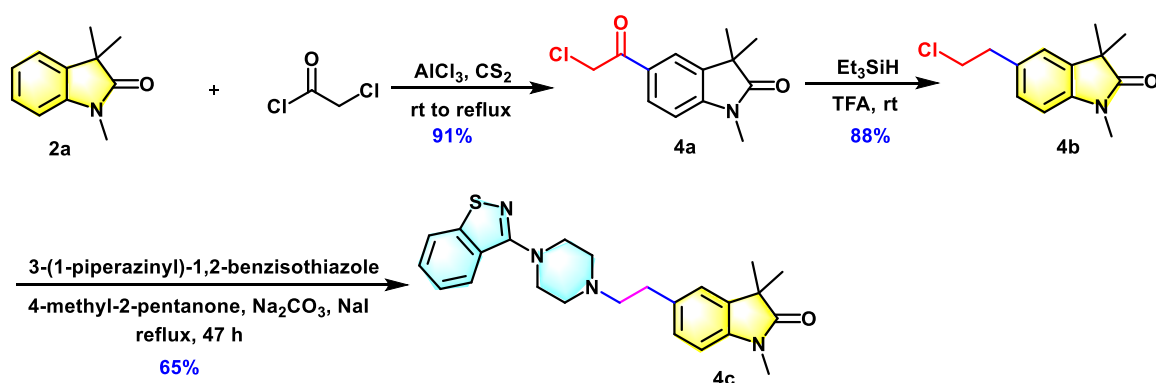

#### Step I

To a 50 mL round bottom flask was added anhydrous  $\text{AlCl}_3$  (6.2 equiv., 4.13 g),  $\text{CS}_2$  (20 mL) and chloroacetyl chloride (1.3 equiv., 517  $\mu$ L). To the stirring mixture was added oxindole **2a** (5 mmol, 1.0 equiv., 876 mg) portionwise over 15 min. The reaction mixture was stirred further 10 min, then refluxed for 5.5 h. The reaction mixture was allowed to cool, added to ice, stirred thoroughly, the beige precipitate was filtered, washed with water and dried to afford the product **4a** as a beige solid.

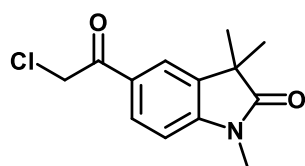

**5-(2-chloroethyl)-1, 3, 3-trimethylindolin-2-one (4a).**<sup>16</sup> yield: 91%, beige solid. <sup>1</sup>H NMR (CDCl<sub>3</sub>, 300 MHz): δ 7.94 (dd, *J* = 8.2, 1.5 Hz, 1H), 7.86 (s, 1H), 6.94 (d, *J* = 8.2 Hz, 1H), 4.69 (s, 2H), 3.27 (s, 3H), 1.41 (s, 6H); <sup>13</sup>C NMR (CDCl<sub>3</sub>, 75 MHz): δ 190.1, 181.6, 148.0, 136.5, 130.2, 129.0, 122.7, 107.8, 45.6, 44.1, 26.6, 24.3.

### Step II

Oxindole **4a** (1.0 equiv., 3 mmol, 755 mg) was added to a Schlenktube followed by addition of TFA (2.5 mL) under N<sub>2</sub>. To this solution was added Et<sub>3</sub>SiH (2.3 equiv., 1.1 mL) while cooling to prevent exotherm. The reaction was stirred for 19 h at rt. After reaction, it was diluted with water and extracted with EtOAc, dried with MgSO<sub>4</sub>, filtered and concentrated. The residue was purified by flash chromatography on silica gel (petroleum ether/EtOAc = 20:1 to 3:1 as the eluent) to afford the desired product **4b** as a white solid.

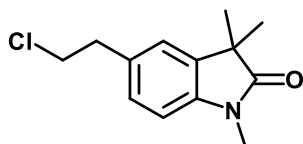

**5-(2-chloroethyl)-1, 3, 3-trimethylindolin-2-one (4b).**<sup>16</sup> yield: 88%, white solid. <sup>1</sup>H NMR (CDCl<sub>3</sub>, 300 MHz): δ 7.12 (d, *J* = 7.9 Hz, 1H), 7.07 (s, 1H), 6.80 (d, *J* = 7.9 Hz, 1H), 3.70 (t, *J* = 7.4 Hz, 2H), 3.21 (s, 3H), 3.06 (t, *J* = 7.4 Hz, 2H), 1.37 (s, 6H); <sup>13</sup>C NMR (CDCl<sub>3</sub>, 75 MHz): δ 181.5, 141.7, 136.3, 132.5, 128.1, 123.0, 108.1, 45.4, 44.4, 39.0, 26.4, 24.5.

### Step III

To a 100 ml round-bottom flask equipped with nitrogen inlet and condenser were added oxindole **4b** (1.0 equiv., 2.57 mmol, 610 mg), N-(3-benzisothiazolyl)-piperazine (1.5 equiv., 845 mg), sodium carbonate (2.0 equiv., 544 mg), sodium iodide (6 mg), and methylisobutyl ketone (30 mL). The reaction was refluxed 47 hours, cooled, filtered, and evaporated. The residue was chromatographed on silica gel (petroleum ether/EtOAc = 3:1 to 1:1 as the eluent) to afford the desired product **4c** as a beige solid.

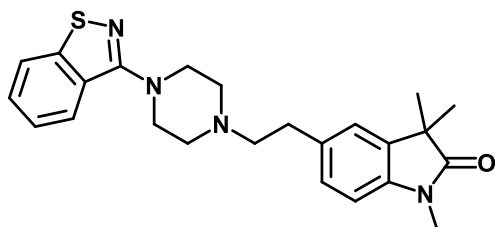

**5-(2-(4-(benzo[d]isothiazol-3-yl)piperazin-1-yl)ethyl)-1, 3, 3-trimethylindolin-2-one (4c).**<sup>16</sup> yield: 65%, beige solid. <sup>1</sup>H NMR (CDCl<sub>3</sub>, 300 MHz): δ 7.89 (d, *J* = 8.1 Hz, 1H), 7.77 (d, *J* = 8.1 Hz, 1H), 7.42 (t, *J* = 7.2 Hz, 1H), 7.32 (t, *J* = 7.6 Hz, 1H), 7.10 (d, *J* = 8.0 Hz, 1H), 7.07 (s, 1H), 6.75 (d, *J* = 7.8 Hz, 1H), 3.58 (t, *J* = 4.4 Hz, 4H), 3.17 (s, 3H), 2.86-2.81 (m, 2H), 2.74 (t, *J* = 4.5 Hz, 4H), 2.69-2.64 (m, 2H), 1.35 (s, 6H); <sup>13</sup>C NMR (CDCl<sub>3</sub>, 75 MHz): δ 181.3, 163.9, 152.7, 140.9, 136.0, 134.5, 128.0, 127.7, 127.5, 123.9, 122.8, 120.6, 107.9, 60.8, 53.0, 50.1, 44.2, 33.3, 26.2,

24.4. IR (ATR): 2980, 2968, 1703, 1619, 1491, 1382, 1350, 1255, 1128, 1003, 821, 773, 731.  
HRMS (ESI): found: 421.2065, calcd. for C<sub>24</sub>H<sub>31</sub>N<sub>4</sub>O<sub>5</sub> [M+H]<sup>+</sup>: 421.2057.

### (k) Synthesis of potent oral *inotropes*<sup>17</sup>

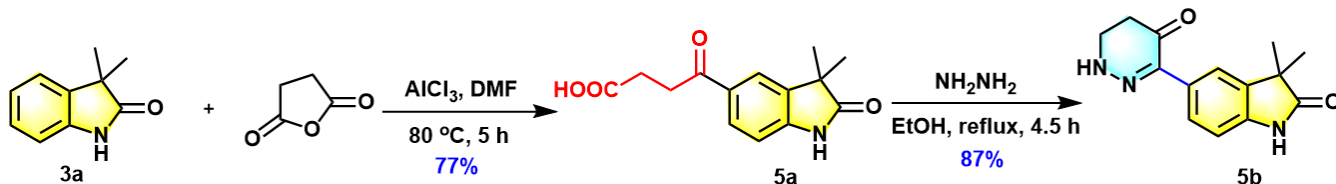

#### Step I

Dimethylformamide (1.1 mL, 2.8 equiv.) was added in a dropwise fashion to anhydrous AlCl<sub>3</sub> (6.67 g, 10.0 equiv.), and the exothermic reaction mixture was then allowed to cool to room temperature. An intimate mixture of succinic anhydride (500 mg, 5 mmol, 1.0 equiv.) and oxindole **3a** (806 mg, 1.0 equiv.) was slowly added to the AlCl<sub>3</sub>/DMF melt. The reaction mixture was then stirred 5 h at 80 °C. The reaction mixture was slowly poured onto ice, and the product **5a** was isolated by filtration as a beige solid.

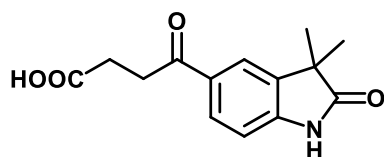

**4-(3,3-dimethyl-2-oxindolin-5-yl)-4-oxobutanoic acid (5a)**.<sup>17</sup> yield: 77%, beige solid. <sup>1</sup>H NMR (d<sub>6</sub>-DMSO, 300 MHz): δ 12.14 (s, 1H), 10.76 (s, 1H), 7.97 (s, 1H), 7.93 (d, *J* = 8.2 Hz, 1H), 6.99 (d, *J* = 8.1 Hz, 1H), 3.24 (t, *J* = 5.9 Hz, 2H), 2.60 (t, *J* = 6.1 Hz, 2H), 1.33 (s, 6H); <sup>13</sup>C NMR (CDCl<sub>3</sub>, 75 MHz): δ 197.9, 183.5, 174.9, 146.6, 137.2, 131.5, 130.0, 123.4, 110.0, 44.6, 33.7, 28.9, 24.8.

#### Step II

A mixture of **5a** (784 mg, 3.0 mmol) and 50% hydrazine hydrate (661 mg, 2.2 equiv.) in 10 mL of absolute ethanol was refluxed for 4.5 h and then cooled slowly to room temperature. The precipitate was filtered and dried to afford 630 mg of product **5b** as a light-tan solid.

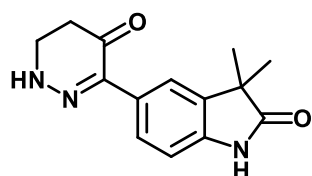

**3,3-dimethyl-5-(4-oxo-1,4,5,6-tetrahydropyridazin-3-yl)indolin-2-one (5b)**.<sup>17</sup> yield: 87%, light-tan solid. <sup>1</sup>H NMR (d<sub>6</sub>-DMSO, 300 MHz): δ 10.84 (s, 1H), 10.53 (s, 1H), 7.74 (s, 1H), 7.60 (d, *J* = 8.1 Hz, 1H), 6.92 (d, *J* = 8.1 Hz, 1H), 2.96 (t, *J* = 8.0 Hz, 2H), 2.46 (t, *J* = 8.1 Hz, 2H), 1.30 (s, 6H); <sup>13</sup>C NMR (CDCl<sub>3</sub>, 75 MHz): δ 183.2, 168.0, 150.6, 143.1, 137.3, 130.6, 126.7, 121.0,



110.1, 44.7, 27.0, 24.9, 22.9. IR (ATR): 3198, 1709, 1652, 1617, 1499, 1355, 1209, 970, 808, 698. HRMS (ESI): found: 258.1238, calcd. for  $C_{14}H_{16}N_3O_2$   $[M+H]^+$ : 258.1237.

## Mechanism study

### Scheme 1 Control experiment

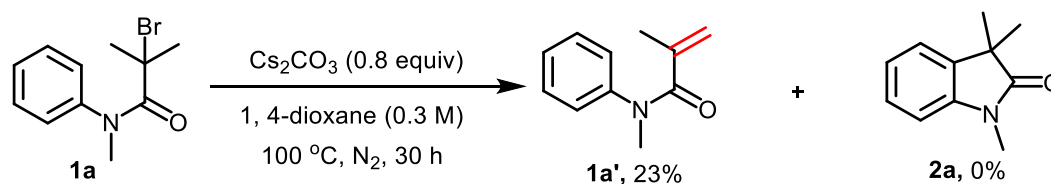

#### Procedures:

$\alpha$ -bromoamide **1a** (0.3 mmol, 76.8 mg, 1.0 equiv.) and  $\text{Cs}_2\text{CO}_3$  (0.24 mmol, 78.2 mg, 0.8 equiv.) were weighed into a Schlenk tube. The reaction vessel was capped and subjected to three vacuum-purge/nitrogen-flush cycles. Then 1, 4-dioxane (1.0 mL) was added through the side-arm by syringe. The reaction was stirred under argon at  $100\text{ }^\circ\text{C}$  for 30 h. After reaction, the residue was purified by flash chromatography on silica gel (petroleum ether/EtOAc = 50:1 to 15:1 as the eluent) to afford **1a'** as a white solid.

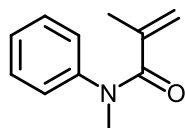

**N-methyl-N-phenylmethacrylamide (1a')**.<sup>18</sup> yield: 23%, white solid.  $^1\text{H}$  NMR ( $\text{CDCl}_3$ , 300 MHz):  $\delta$  7.33 (t,  $J = 7.1$  Hz, 2H), 7.22 (d,  $J = 7.4$  Hz, 1H), 7.12 (d,  $J = 7.2$  Hz, 1H), 5.02 (s, 1H), 4.97 (s, 1H), 3.33 (s, 3H), 1.75 (s, 3H);  $^{13}\text{C}$  NMR ( $\text{CDCl}_3$ , 75 MHz):  $\delta$  171.7, 144.4, 140.5, 129.1, 126.7, 126.3, 119.1, 37.4, 20.1.

### Scheme 2 Heck-type cyclization reaction

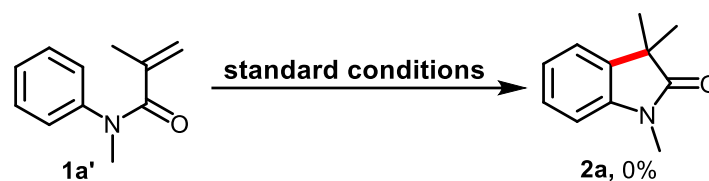

#### Procedures:

$\alpha$ -bromoamide **1a'** (0.30 mmol, 1.0 equiv.), NHC **A** (12.4 mg, 10 mol%) and  $\text{Cs}_2\text{CO}_3$  (0.24 mmol, 78.2 mg, 0.8 equiv.) were weighed into a Schlenk tube. The reaction vessel was capped and subjected to three vacuum-purge/nitrogen-flush cycles. Then 1, 4-dioxane (1.0 mL) was added through the side-arm by syringe. The reaction was stirred under  $\text{N}_2$  at  $100\text{ }^\circ\text{C}$  for 30 h. After reaction, the mixture was detected by GC-MS and showed no desired product produced.

### Scheme 3 Radical trapping experiments

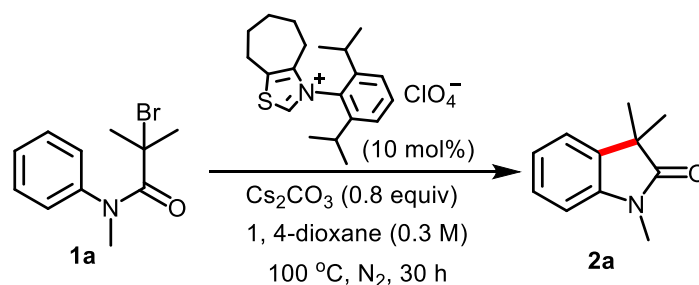

#### Radical scavenger:

|                   |           |
|-------------------|-----------|
| TEMPO (1.0 equiv) | <5% yield |
| O <sub>2</sub>    | trace     |

#### Procedures:

##### (a) TEMPO

$\alpha$ -bromoamide **1a** (0.3 mmol, 76.8 mg, 1.0 equiv.), NHC **A** (12.4 mg, 10 mol%), TEMPO (66.1 mg, 1.0 equiv.) and Cs<sub>2</sub>CO<sub>3</sub> (0.24 mmol, 78.2 mg, 0.8 equiv.) were weighed into a Schlenk tube. The reaction vessel was capped and subjected to three vacuum-purge/nitrogen-flush cycles. Then 1, 4-dioxane (1.0 mL) was added through the side-arm by syringe. The reaction was stirred under argon at 100 °C for 30 h. Only little product **2a** (<5%) was detected by GC-MS.

##### (b) Under O<sub>2</sub>

$\alpha$ -bromoamide **1a** (0.3 mmol, 76.8 mg, 1.0 equiv.), NHC **A** (12.4 mg, 10 mol%) and Cs<sub>2</sub>CO<sub>3</sub> (0.24 mmol, 78.2 mg, 0.8 equiv.) were weighed into a Schlenk tube. The reaction vessel was capped and subjected to O<sub>2</sub> (via O<sub>2</sub> balloon). Then 1, 4-dioxane (1.0 mL) was added through the side-arm by syringe. The reaction was stirred under argon at 100 °C for 30 h. Only trace product **2a** was detected by GC-MS.

##### (c) *N*-allyl substrate for radical cyclization

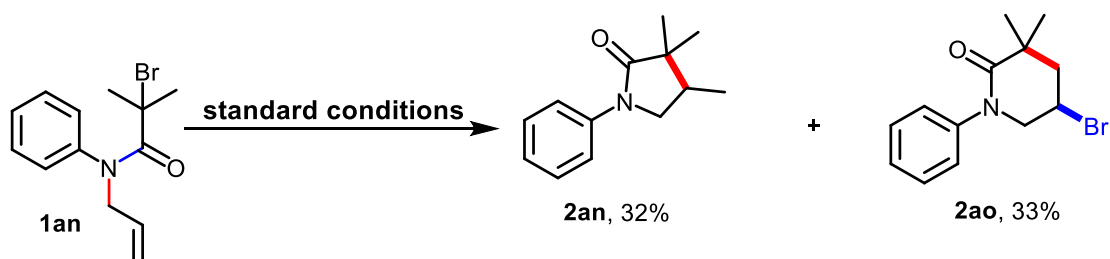

#### Procedures:

$\alpha$ -bromoamide **1an** (0.30 mmol, 1.0 equiv.), NHC **A** (12.4 mg, 10 mol%) and Cs<sub>2</sub>CO<sub>3</sub> (0.24 mmol, 78.2 mg, 0.8 equiv.) were weighed into a Schlenk tube. The reaction vessel was capped and subjected to three vacuum-purge/nitrogen-flush cycles. Then 1, 4-dioxane (1.0 mL) was added through the side-arm by syringe. The reaction was stirred

under N<sub>2</sub> at 100 °C for 30 h. After reaction, the residue was purified by flash chromatography on silica gel (petroleum ether/EtOAc = 50:1 to 30:1 as the eluent) to afford the products **2an** and **2ao**.

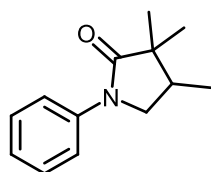

**N-methyl-N-phenylmethacrylamide (2an)**.<sup>19</sup> yield: 32%, white solid. <sup>1</sup>H NMR (CDCl<sub>3</sub>, 300 MHz): δ 7.65 (d, *J* = 7.9 Hz, 2H), 7.36 (t, *J* = 7.7 Hz, 2H), 7.12 (t, *J* = 7.4 Hz, 1H), 3.78 (dd, *J* = 9.4, 7.7 Hz, 1H), 3.38 (t, *J* = 9.3 Hz, 1H), 2.27-2.14 (m, 1H), 1.22 (s, 3H), 1.08 (d, *J* = 6.9 Hz, 3H), 1.03 (s, 3H). <sup>13</sup>C NMR (CDCl<sub>3</sub>, 75 MHz): δ 179.4, 139.9, 128.9, 124.3, 119.7, 52.4, 44.8, 37.8, 23.8, 18.5, 12.5.

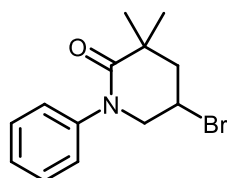

**N-methyl-N-phenylmethacrylamide (2ao)**. yield: 33%, white solid. <sup>1</sup>H NMR (CDCl<sub>3</sub>, 300 MHz): δ 7.65 (d, *J* = 7.9 Hz, 2H), 7.38 (t, *J* = 7.6 Hz, 2H), 7.15 (t, *J* = 7.4 Hz, 1H), 4.00 (dd, *J* = 9.9, 7.6 Hz, 1H), 3.62-3.53 (m, 2H), 3.40 (t, *J* = 10.3 Hz, 1H), 2.64-2.54 (m, 1H), 1.32 (s, 3H), 1.10 (s, 3H). <sup>13</sup>C NMR (CDCl<sub>3</sub>, 75 MHz): δ 177.8, 139.4, 129.0, 124.8, 119.9, 50.7, 45.6, 45.4, 31.3, 24.5, 18.7. IR (ATR): 2967, 1691, 1595, 1499, 1394, 1298, 1101, 896, 798, 757. HRMS (ESI): found: 282.0489, calcd. for C<sub>13</sub>H<sub>17</sub>BrNO [M+H]<sup>+</sup>: 282.0488.

#### Scheme 4 Radical rearrangement experiments

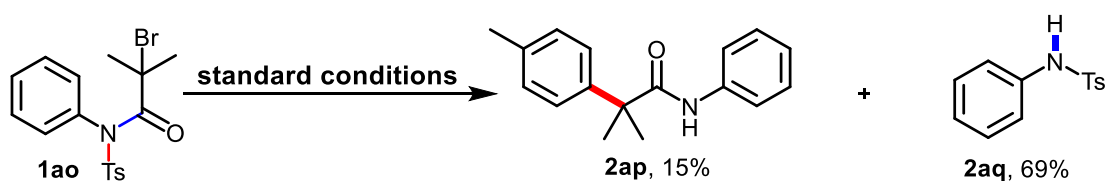

#### Procedures:

$\alpha$ -bromoamide **1ao** (0.30 mmol, 1.0 equiv.), NHC **A** (12.4 mg, 10 mol%) and Cs<sub>2</sub>CO<sub>3</sub> (0.24 mmol, 78.2 mg, 0.8 equiv.) were weighed into a Schlenk tube. The reaction vessel was capped and subjected to three vacuum-purge/nitrogen-flush cycles. Then 1, 4-dioxane (1.0 mL) was added through the side-arm by syringe. The reaction was stirred under N<sub>2</sub> at 100 °C for 30 h. After reaction, the residue was purified by flash chromatography on silica gel (petroleum ether/EtOAc = 40:1 to 10:1 as the eluent) to afford the products **2ap** and **2aq**.

Proposed mechanism:

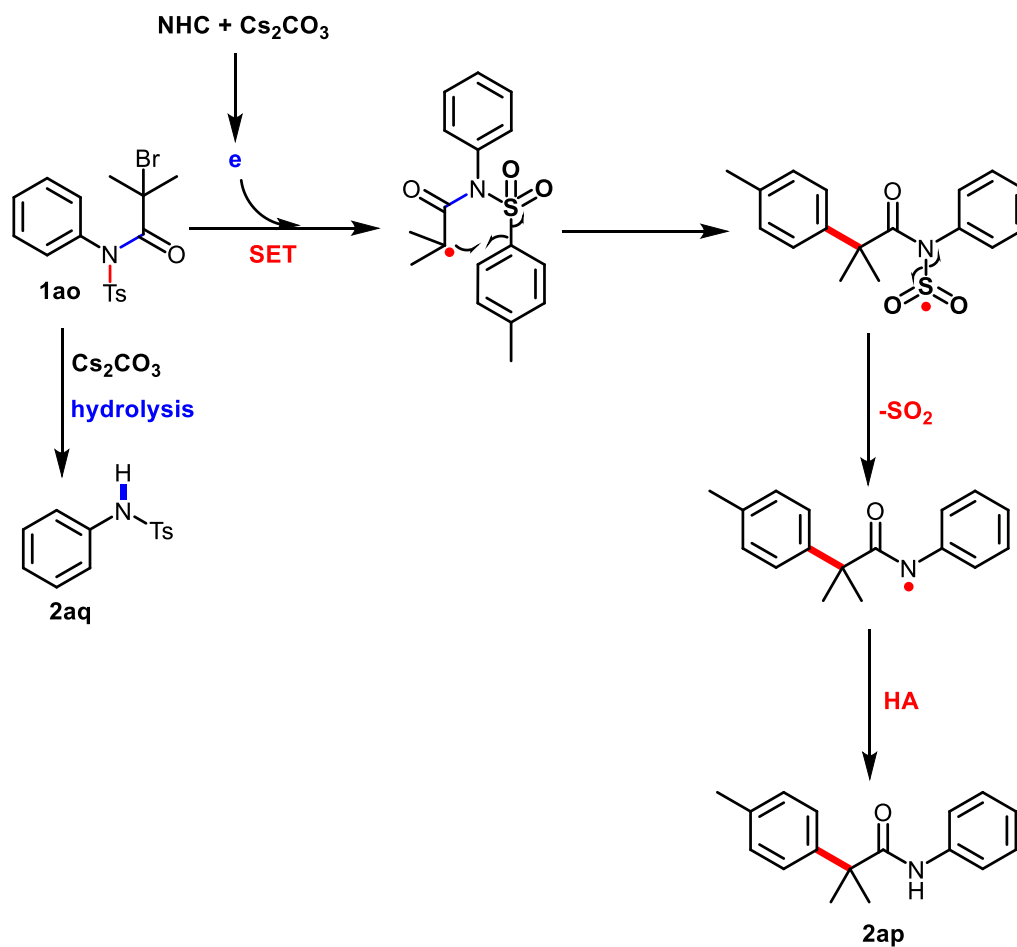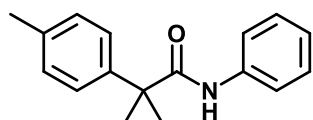

**2-methyl-N-phenyl-2-(*p*-tolyl)propanamide (2ap).**<sup>20</sup> yield: 15%, white solid. <sup>1</sup>H NMR (CDCl<sub>3</sub>, 300 MHz): δ 7.37-7.32 (m, 4H), 7.27 (d, *J* = 6.6 Hz, 2H), 7.21 (d, *J* = 8.4 Hz, 2H), 7.05 (t, *J* = 7.2 Hz, 1H), 6.82 (s, 1H), 2.37 (s, 3H), 1.65 (s, 6H); <sup>13</sup>C NMR (CDCl<sub>3</sub>, 75 MHz): δ 176.0, 141.7, 138.2, 137.2, 129.8, 129.0, 126.6, 124.2, 119.7, 47.9, 27.2, 21.1.

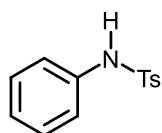

**4-methyl-N-phenylbenzenesulfonamide (2aq).**<sup>21</sup> yield: 69%, white solid. <sup>1</sup>H NMR (CDCl<sub>3</sub>, 300 MHz): δ 7.69 (d, *J* = 7.3 Hz, 2H), 7.37 (s, 1H), 7.25-7.19 (m, 4H), 7.10-7.05 (m, 3H), 2.35 (s, 3H); <sup>13</sup>C NMR (CDCl<sub>3</sub>, 75 MHz): δ 144.0, 136.7, 136.1, 129.7, 129.4, 127.4, 125.3, 121.5, 21.6.

### Scheme 5 Influences of the amount of base

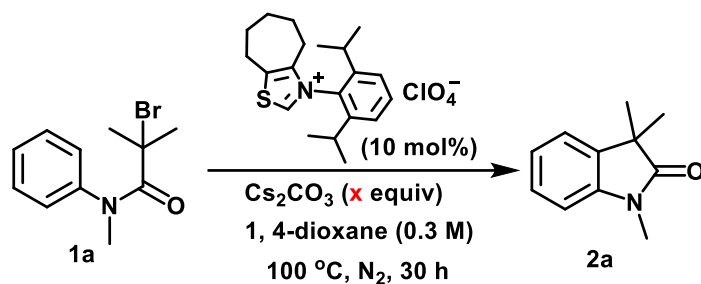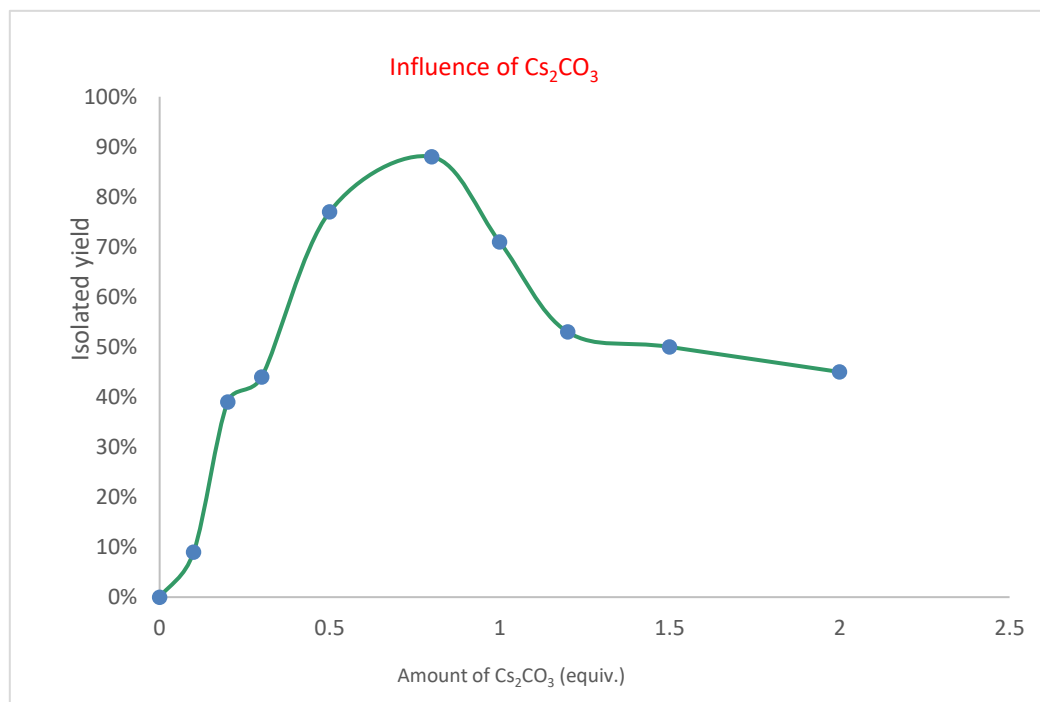

**Procedure:** Following the **General Procedure for NHC-Catalyzed Oxindole Synthesis**.

### Scheme 6 Competitive experiments

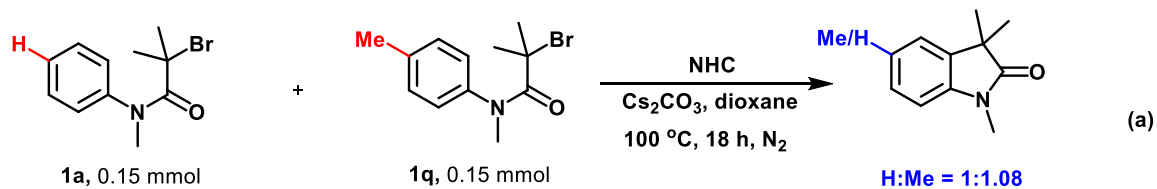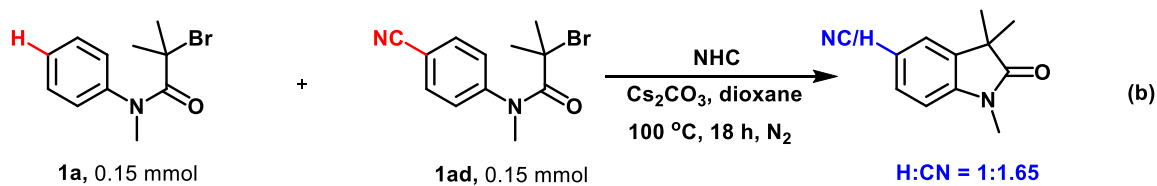

### Procedures:

(a)  $\alpha$ -bromoamides **1a/1q** (0.15 mmol, 1.0 equiv.), NHC **A** (12.4 mg, 10 mol%) and  $\text{Cs}_2\text{CO}_3$  (0.24 mmol, 78.2 mg, 0.8 equiv.) were weighed into a Schlenk tube. The reaction vessel was capped and subjected to three vacuum-purge/nitrogen-flush cycles. Then 1, 4-dioxane (1.0 mL) was added through the side-arm by syringe. The reaction was stirred under  $\text{N}_2$  at 100 °C for 18 h. After reaction, the residue was purified by flash chromatography on silica gel (petroleum ether/EtOAc = 50:1 to 30:1 as the eluent) to afford the products mixture as an oil, then  $\text{CH}_2\text{Br}_2$  (0.15 mmol) was added and the mixture was subjected to  $^1\text{H}$  NMR, the ratios of the products were determined by  $^1\text{H}$  NMR.

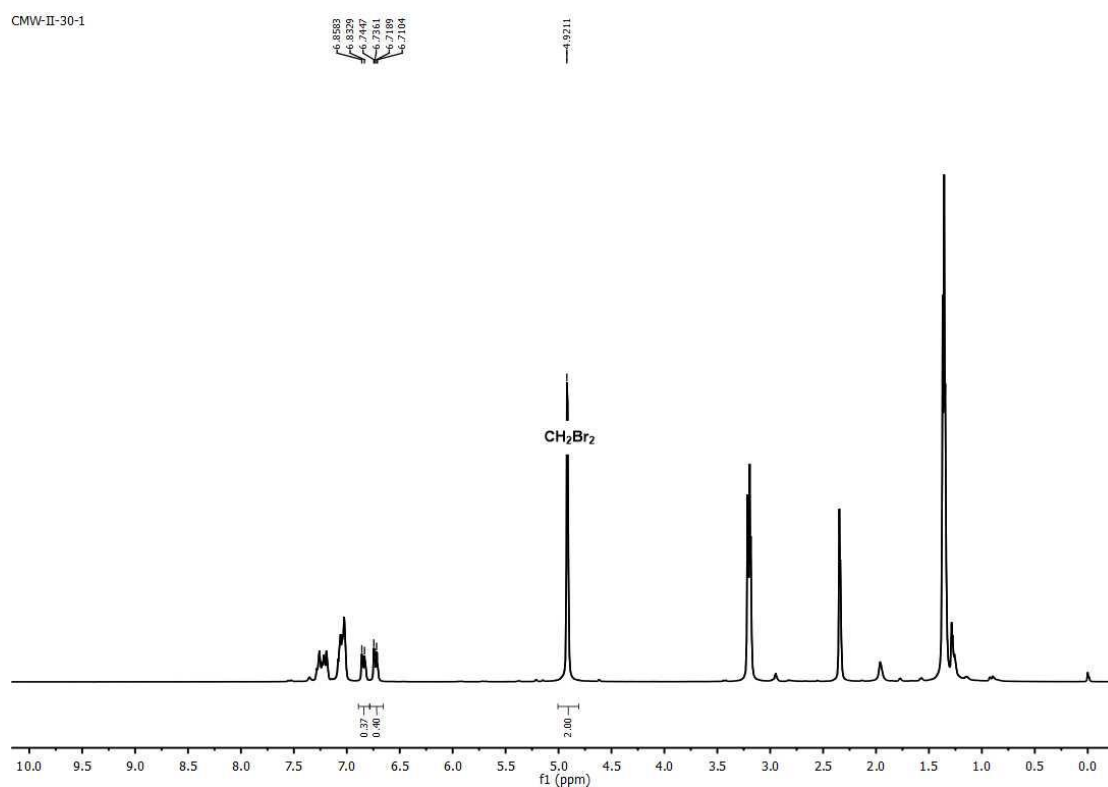

(b)  $\alpha$ -bromoamides **1a/1ad** (0.15 mmol, 1.0 equiv.), NHC **A** (12.4 mg, 10 mol%) and  $\text{Cs}_2\text{CO}_3$  (0.24 mmol, 78.2 mg, 0.8 equiv.) were weighed into a Schlenk tube. The reaction vessel was capped and subjected to three vacuum-purge/nitrogen-flush cycles. Then 1, 4-dioxane (1.0 mL) was added through the side-arm by syringe. The reaction was stirred under  $\text{N}_2$  at 100 °C for 18 h. After reaction, the residue was purified by flash chromatography on silica gel (petroleum ether/EtOAc = 50:1 to 30:1 as the eluent) to afford the product **3a** (15.9 mg, 60% yield), **3q** (28.0 mg, 99% yield).

### Scheme 7 Reaction under light or in the dark

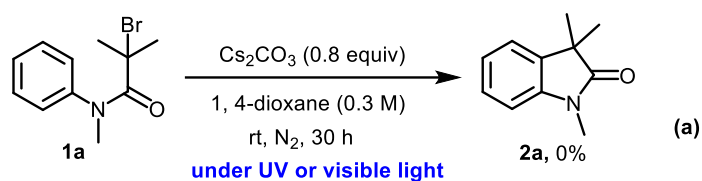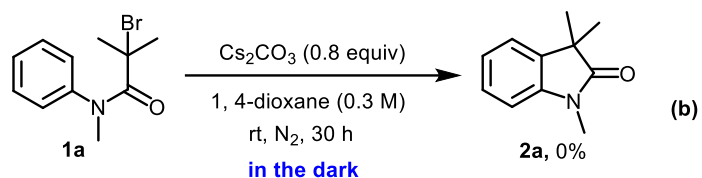

#### Procedures:

(a)  $\alpha$ -bromoamides **1a** (0.3 mmol, 1.0 equiv.) and  $\text{Cs}_2\text{CO}_3$  (0.24 mmol, 78.2 mg, 0.8 equiv.) were weighed into a Schlenk tube. The reaction vessel was capped and subjected to three vacuum-purge/nitrogen-flush cycles. Then 1, 4-dioxane (1.0 mL) was added through the side-arm by syringe. The reaction was stirred *under UV or visible light* at rt for 30 h. After reaction, only starting material **1a** was detected.

(b)  $\alpha$ -bromoamides **1a** (0.3 mmol, 1.0 equiv.) and  $\text{Cs}_2\text{CO}_3$  (0.24 mmol, 78.2 mg, 0.8 equiv.) were weighed into a Schlenk tube. The reaction vessel was capped and subjected to three vacuum-purge/nitrogen-flush cycles. Then 1, 4-dioxane (1.0 mL) was added through the side-arm by syringe. The reaction was stirred *in the dark* at rt for 30 h. After reaction, only starting material **1a** was detected.



## References

- (1) C.-P. Chuang, Y.-Y. Chen, T.-H. Chuang, C.-H. Yang, *Synthesis*, **2017**, *49*, 1273.
- (2) K. Lu, X.-W. Han, W.-W. Yao, Y.-X. Luan, Y.-X. Wang, H. Chen, X.-T. Xu, K. Zhang, M. Ye, *ACS Catal.*, **2018**, *8*, 3913.
- (3) J.-Q. Chen, Y.-L. Wei, G.-Q. Xu, Y.-M. Liang, P.-F. Xu, *Chem. Commun.*, **2016**, *52*, 6455.
- (4) C. Liu, D. Liu, W. Zhang, L. Zhou, A. Lei, *Org. Lett.*, **2013**, *15*, 6166.
- (5) J. M. D. Storey, M. M. Ladwa, *Tetrahedron Lett.*, **2006**, *47*, 381.
- (6) B. Mondala, B. Roy, *RSC Adv.*, **2015**, *5*, 69119.
- (7) X. Jiang, J. Yang, F. Zhang, P. Yu, P. Yi, Y. Sun, Y. Wang, *Org. Lett.*, **2016**, *18*, 3154.
- (8) W. G. Beyersbergen van Henegouwen, R. M. Fieseler, F. P. J. T. Rutjes, H. Hiemstra, *J. Org. Chem.*, **2000**, *65*, 8317.
- (9) H. Li, X. Yan, J. Zhang, W. Guo, J. Jiang, J. Wang, *Angew. Chem. Int. Ed.*, **2019**, *58*, 6732.
- (10) T. Nishio, N. Okuda, Y. Omote, *J. Chem. Soc. Perkin Trans. 1*, **1988**, *7*, 1663.
- (11) W.-L. Jia, N. Westerveld, K. M. Wong, T. Morsch, M. Hakkennes, K. Naksomboon, M. Á. Fernández-Ibáñez, *Org. Lett.*, **2019**, *21*, 9339.
- (12) W.-H. Li, C. Li, L. Dong, *Asian J. Org. Chem.*, **2018**, *7*, 2448.
- (13) H. Li, W. Guo, J. Jiang, J. Wang, *Asian J. Org. Chem.*, **2020**, *9*, 233.
- (14) M. Fukui, Y. Endo, T. Oishi, *Chem. Pharm. Bull.*, **1980**, *28*, 3639.
- (15) W. von der Saal, J.-P. Hoick, W. Kampe, A. Mertens, B. Müller-Beckmann, *J. Med. Chem.*, **1989**, *32*, 1481.
- (16) S. J. Romano, PCT Int. Appl., 2004100955, **2004**.
- (17) D. W. Robertson, J. H. Krushinski, E. E. Beedle, V. Wyss, G. D. Pollock, H. Wilson, R. F. Kauffman, J. S. Hayes, *J. Med. Chem.* **1986**, *29*, 1832.
- (18) P. Kilaru, S. P. Acharya, P. Zhao, *Chem. Commun.*, **2018**, *54*, 924.
- (19) J.-Q. Chen, R. Chang, J.-B. Lin, Y.-C. Luo, P.-F. Xu, *Org. Lett.*, **2018**, *20*, 2395.
- (20) Y. Li, B. Hu, W. Dong, X. Xie, J. Wan, Z. Zhang, *J. Org. Chem.*, **2016**, *81*, 7036.
- (21) I. A. MacKenzie, L. Wang, N. P. R. Onuska, O. F. Williams, K. Begam, A. M. Moran, B. D. Dunietz, D. A. Nicewicz, *Nature* **2020**, *580*, 76.

# NMR Spectra Images of Products

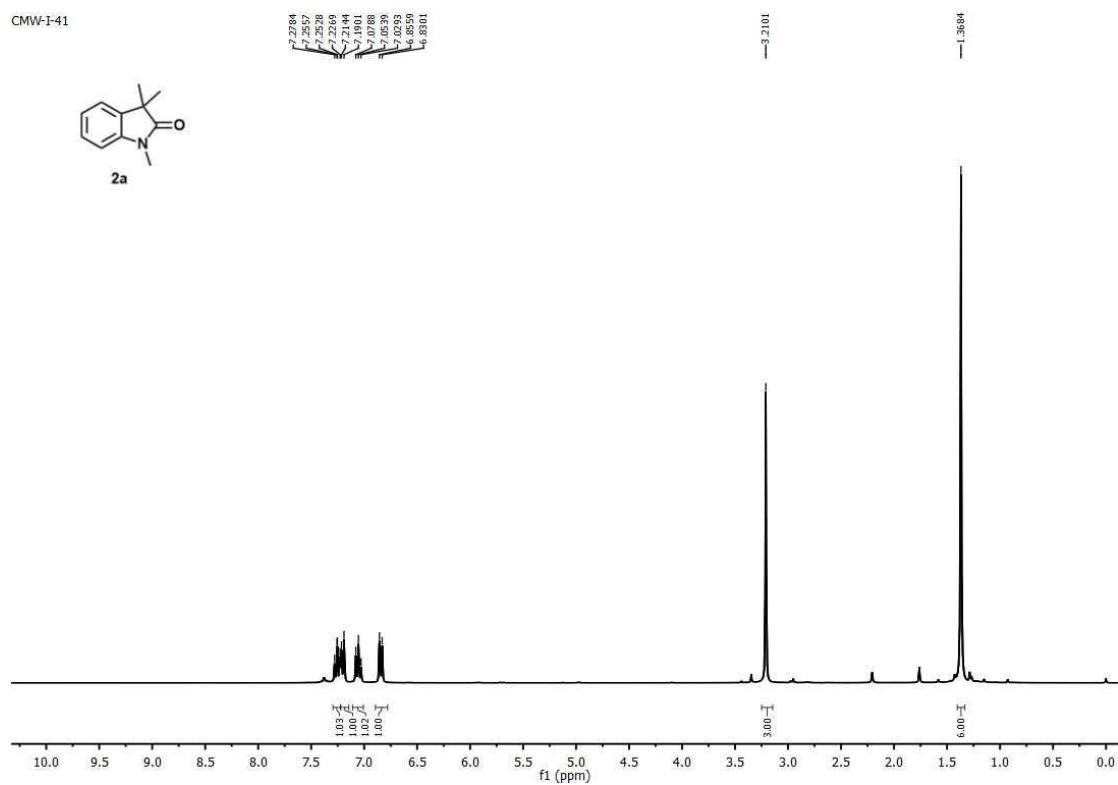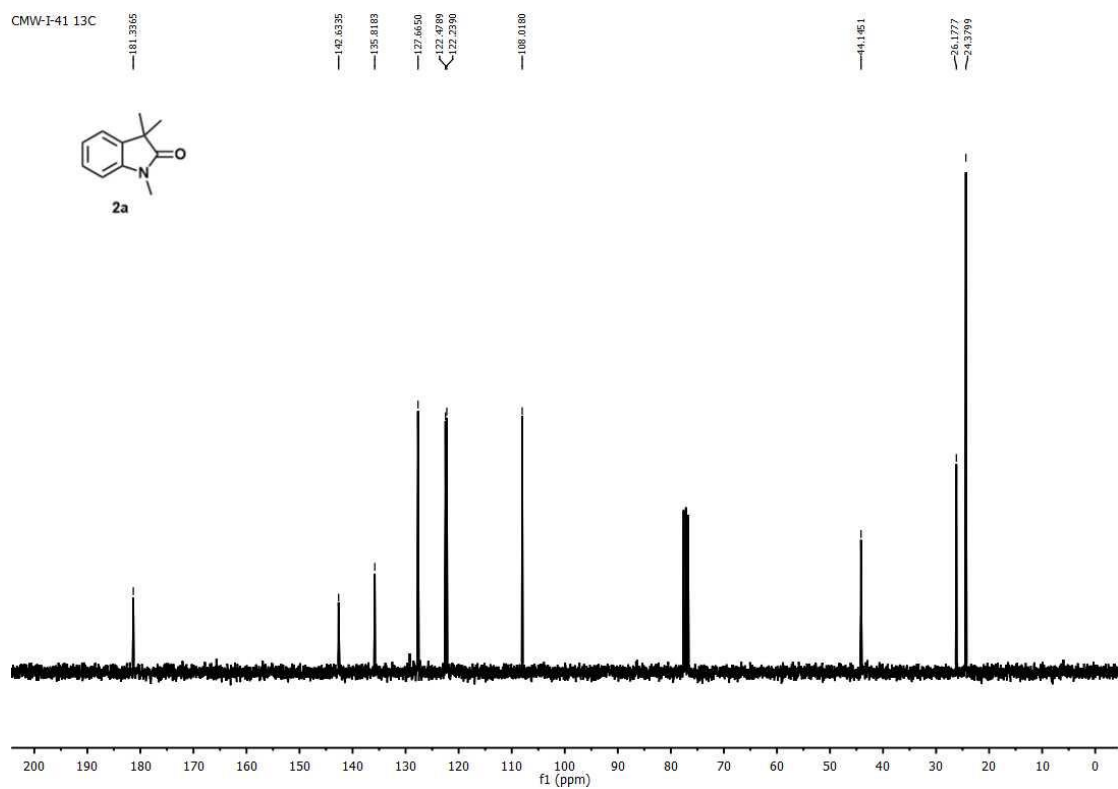

CMW-I-119-10

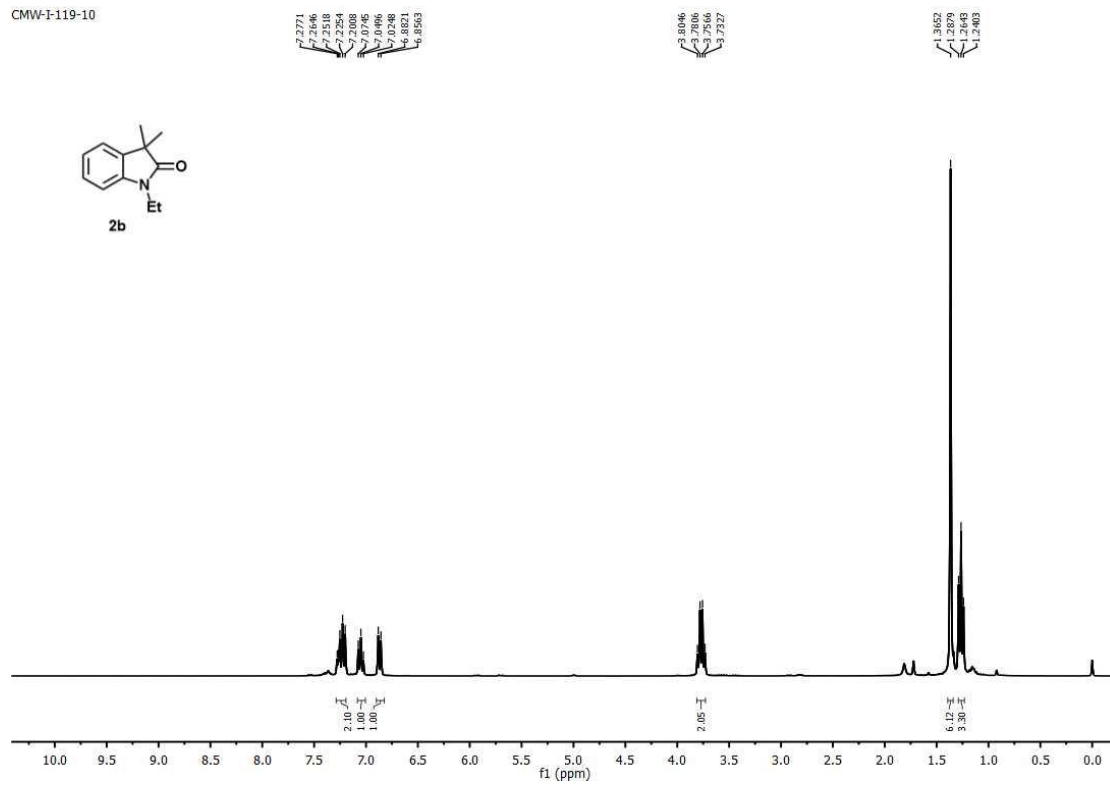

CMW-I-119-10 13C

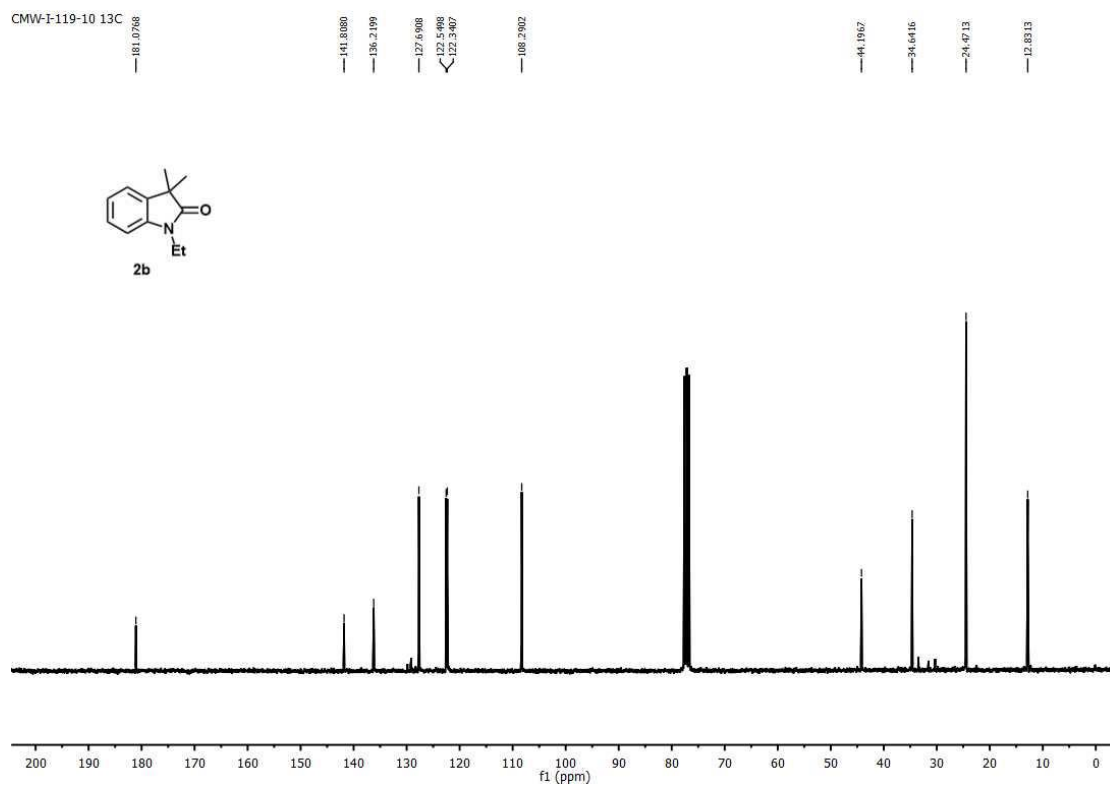

CMW-I-149

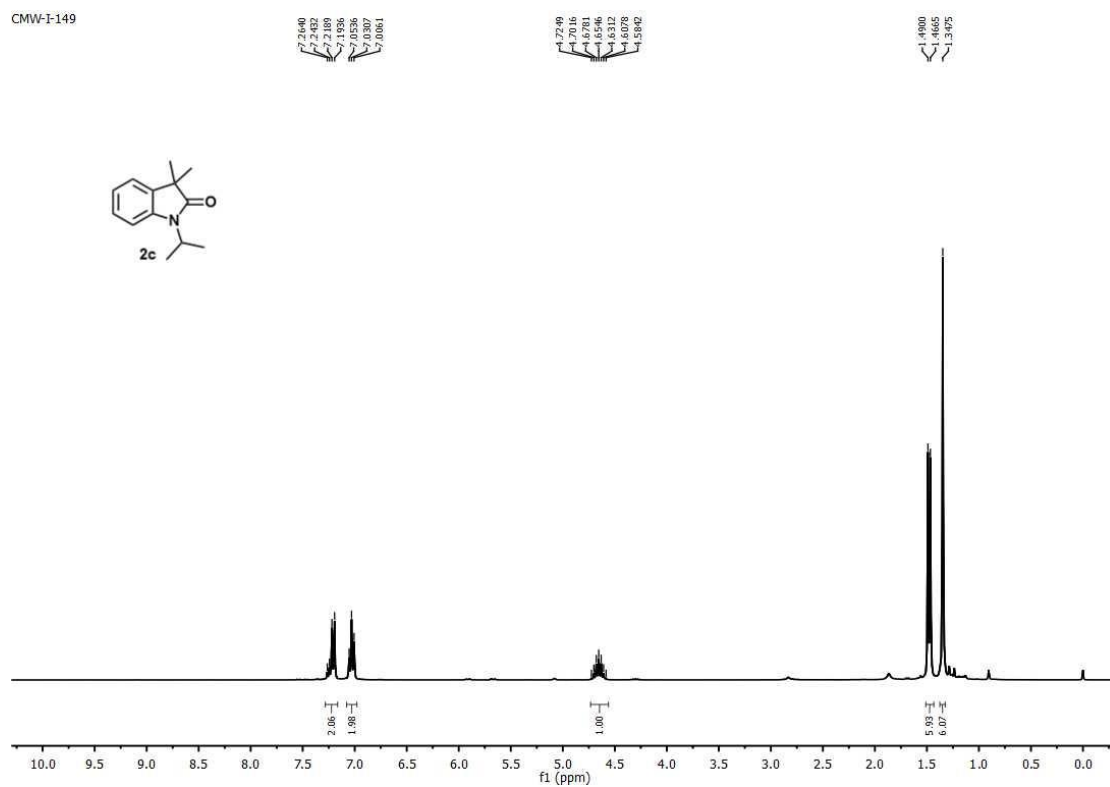

CMW-I-149 13C

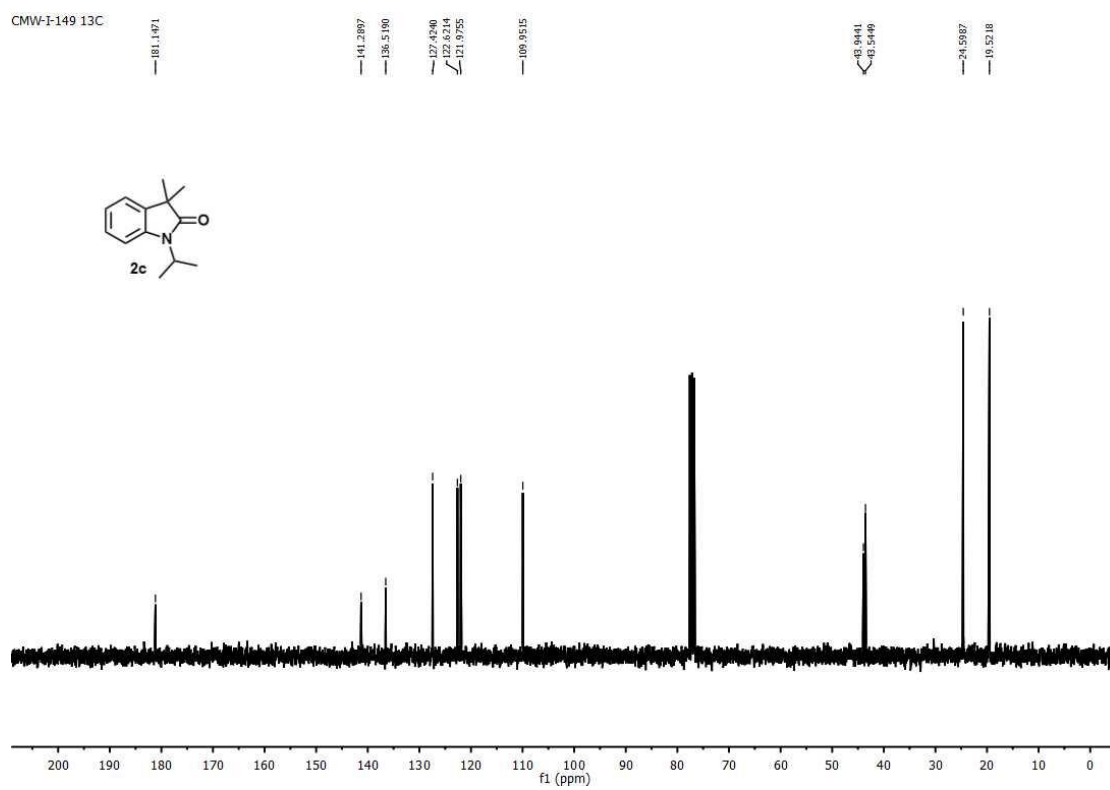

CMW-I-190

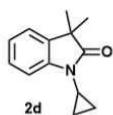

7.2680  
7.2611  
7.2323  
7.1915  
7.1876  
7.1869  
7.1889  
7.0171  
7.0522  
7.0276

2.6085  
2.6078  
2.601  
2.600  
2.6364  
2.6253  
2.6126

1.3354  
1.0905  
1.0666  
1.0478  
0.975  
0.9131  
0.9086  
0.8749

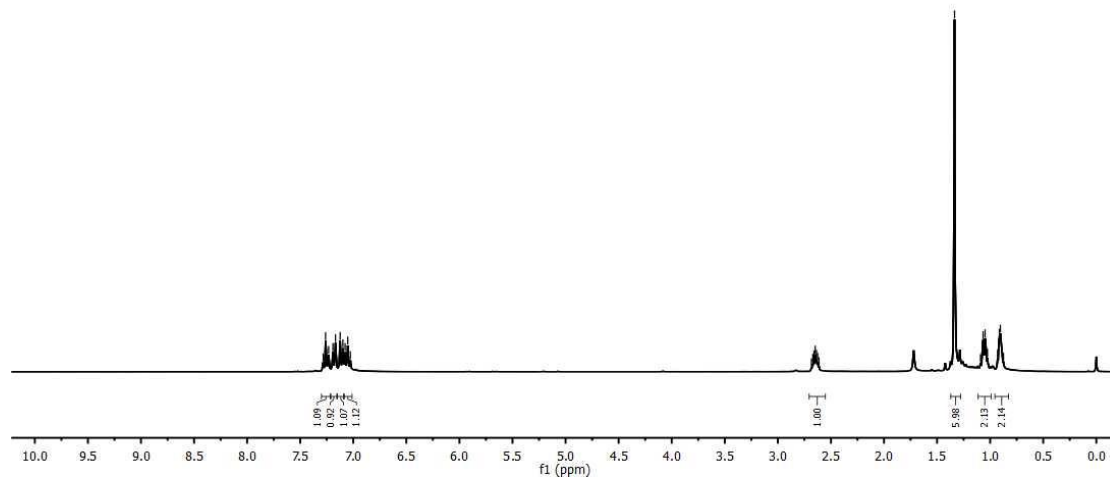

CMW-I-190 13C

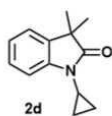

182.1671

143.1295

138.5526

127.6354

122.4697

122.2494

109.4716

41.2455

24.8551

21.1736

6.1408

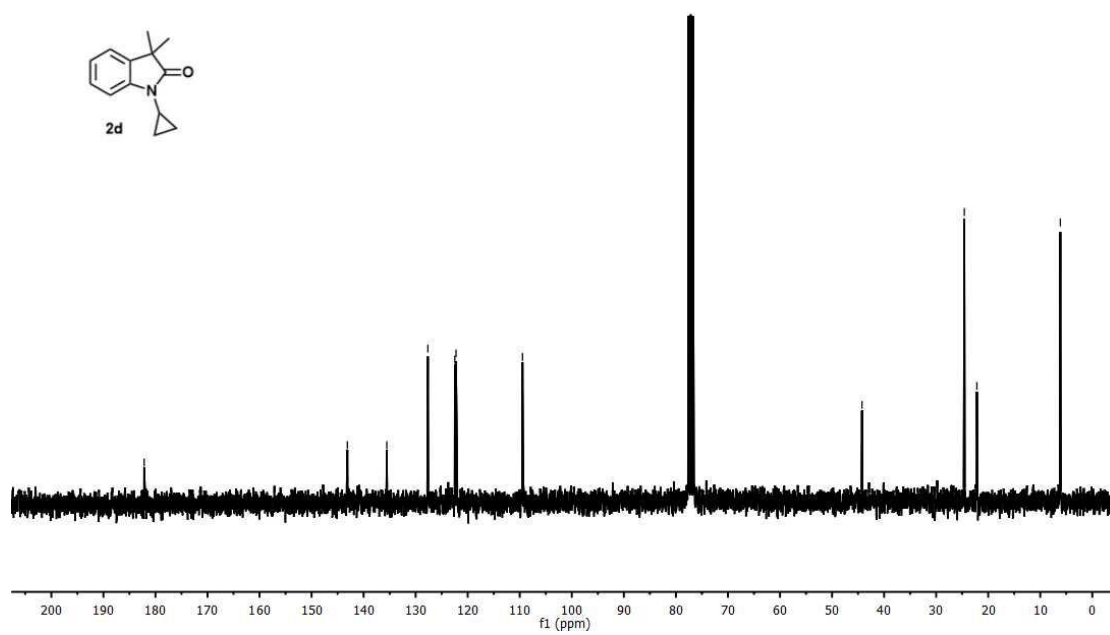

CMW-I-122-5

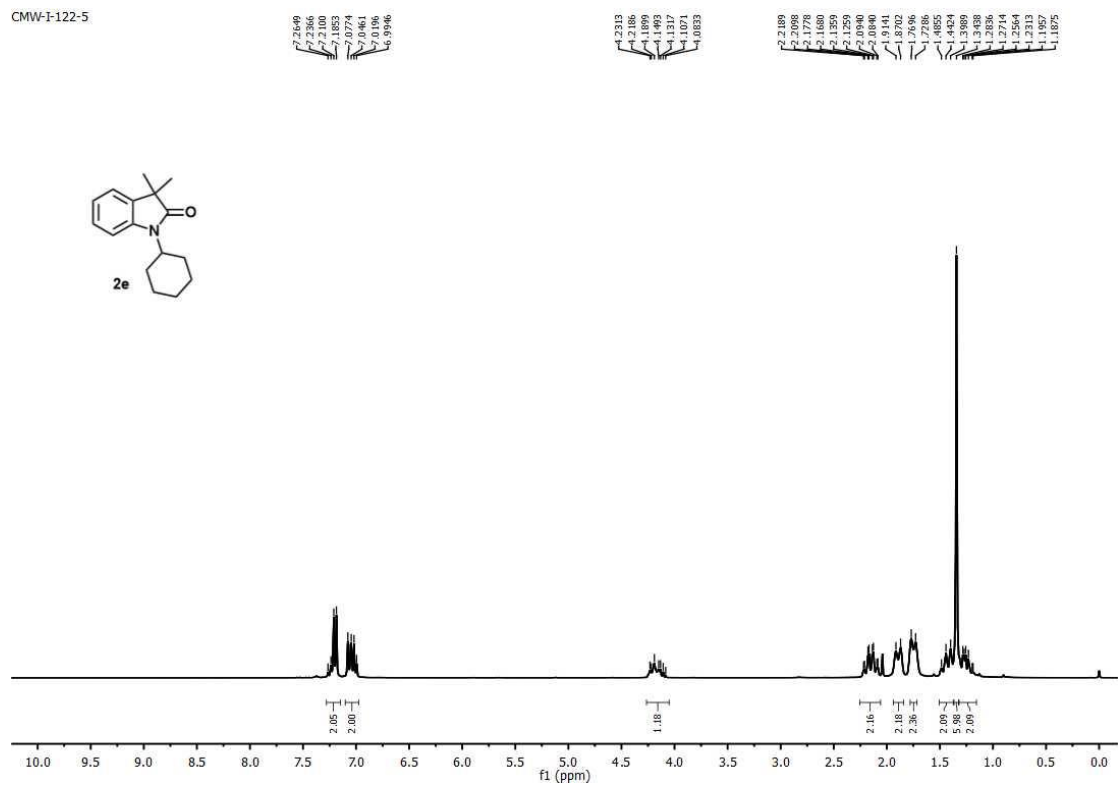

CMW-I-122-5 13C

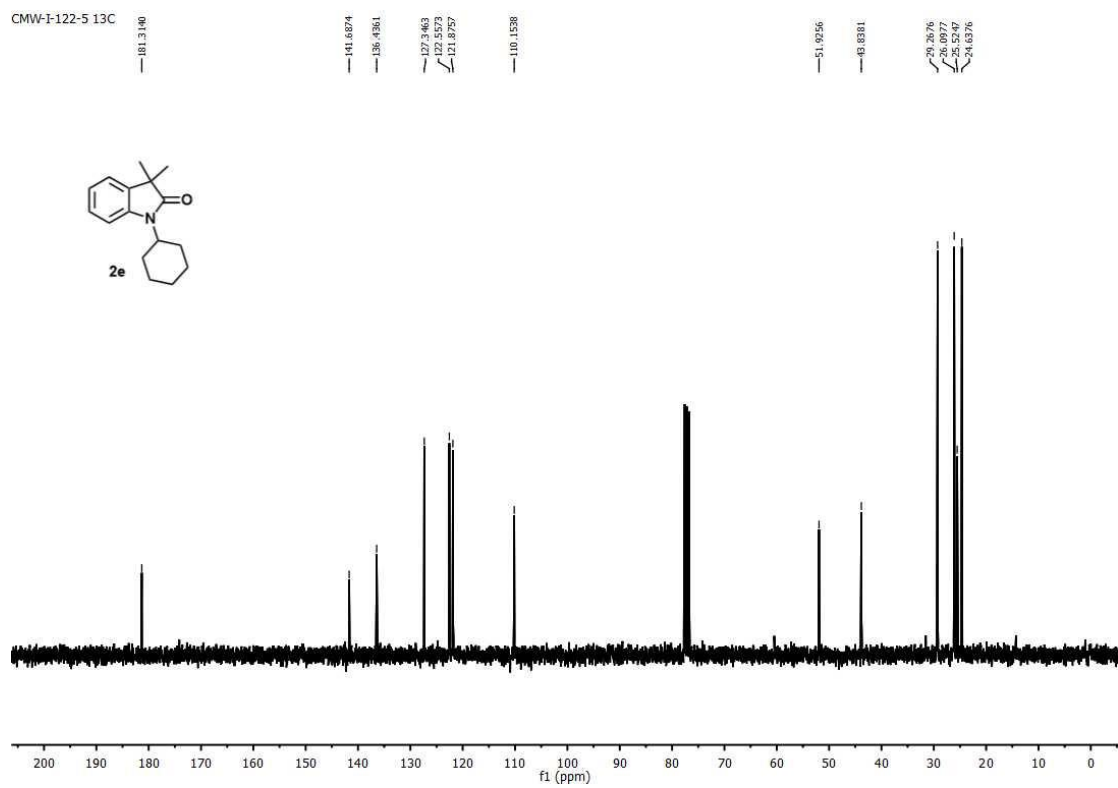

CMW-I-125-1

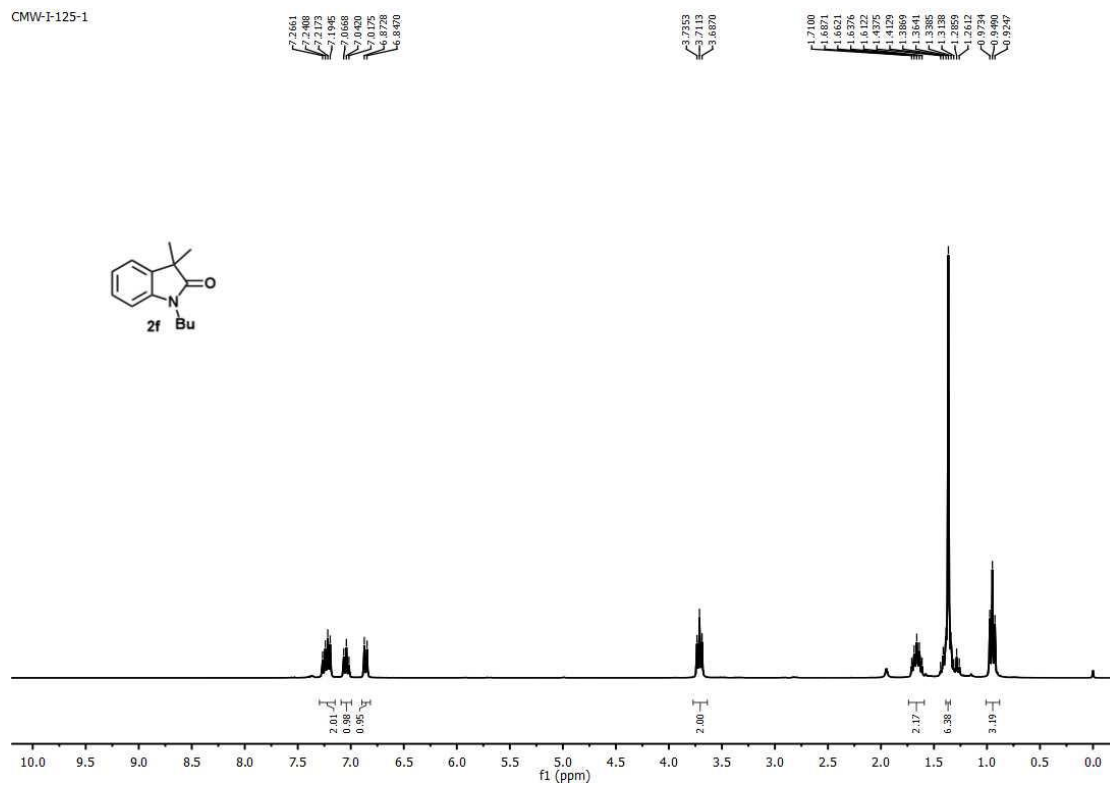

CMW-I-125-1 13C

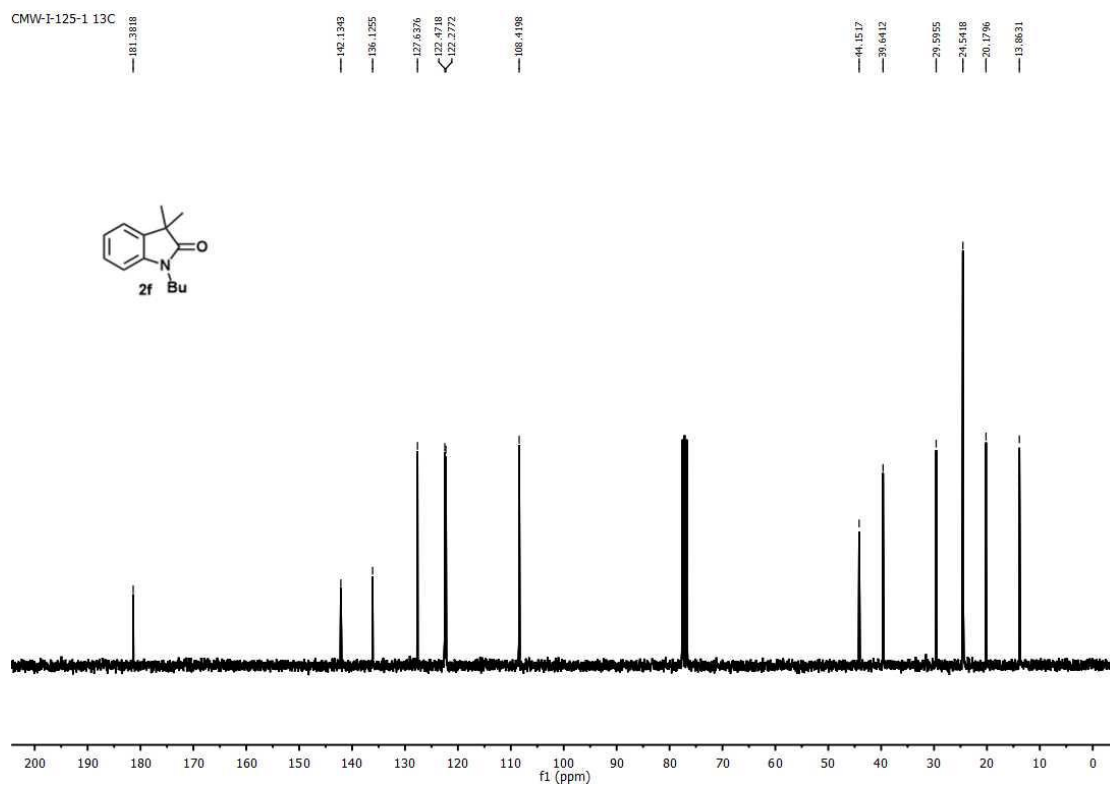

CMW-I-147

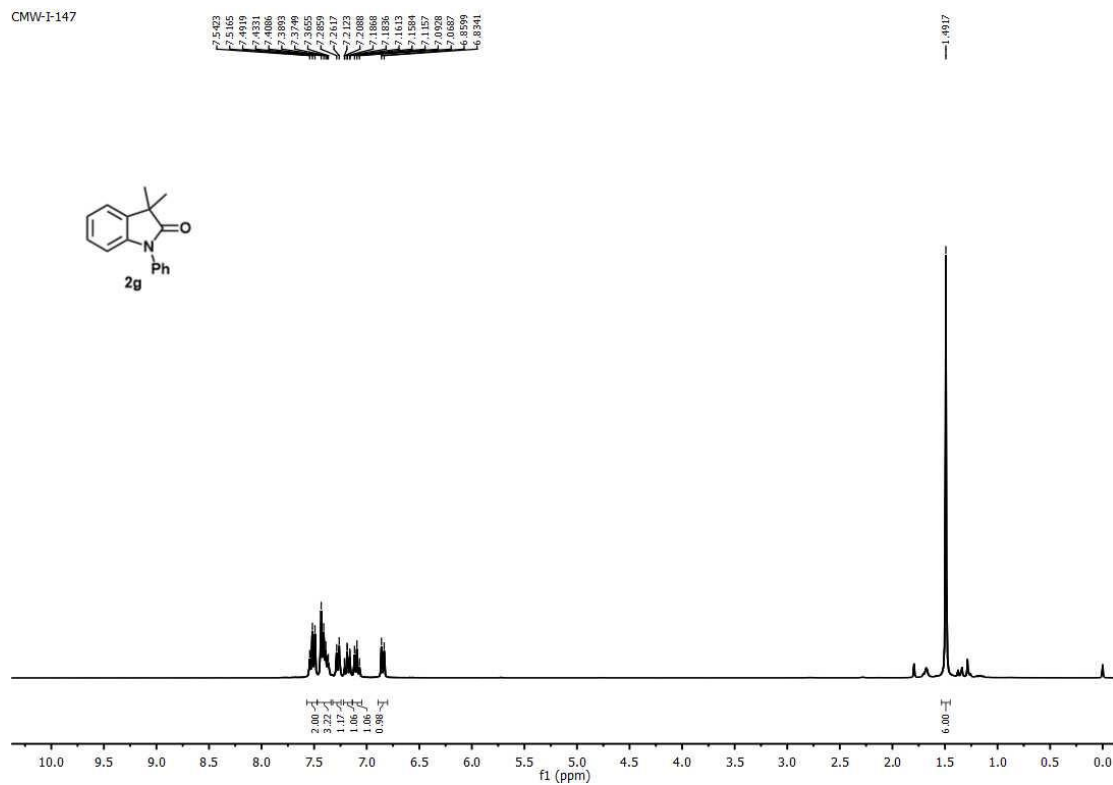

CMW-I-147 13C

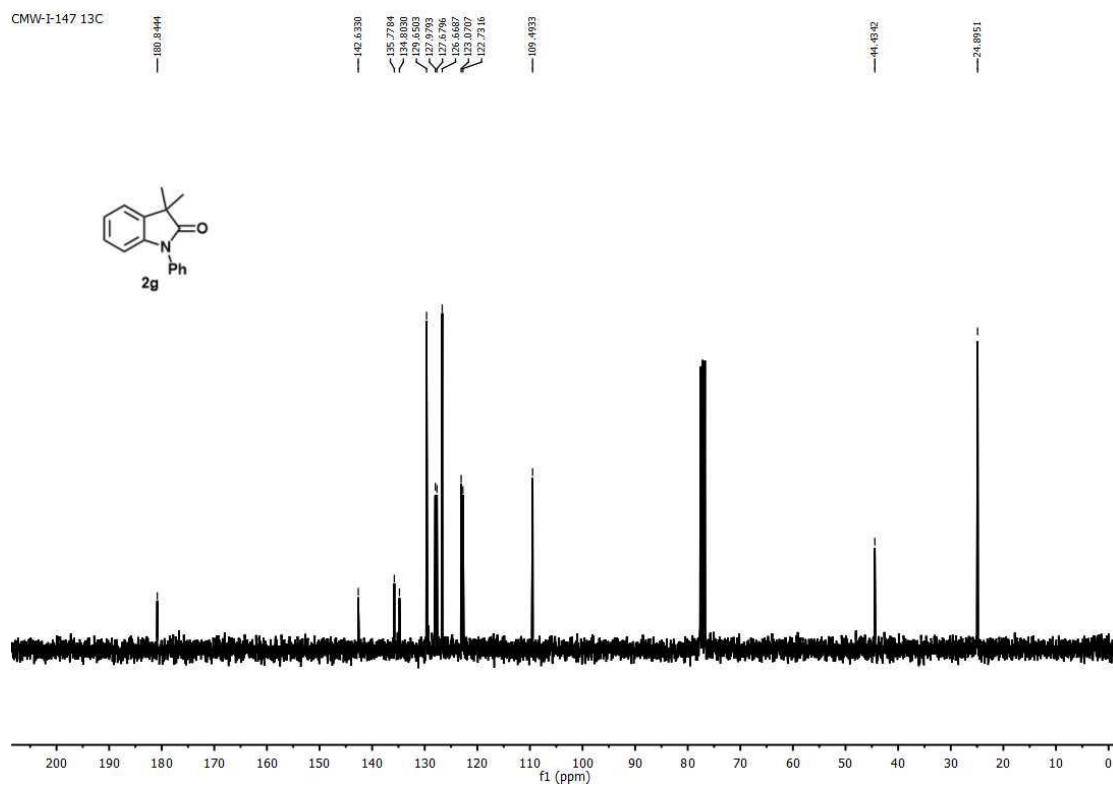



CMW-I-122-3

7.2371  
7.2362  
7.2796  
7.2733  
7.2588  
7.2544  
7.2350  
7.2209  
7.1866  
7.1702  
7.1555  
7.1400  
7.0405  
6.9912  
6.9786  
6.9723

4.9142

1.3354

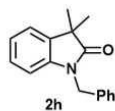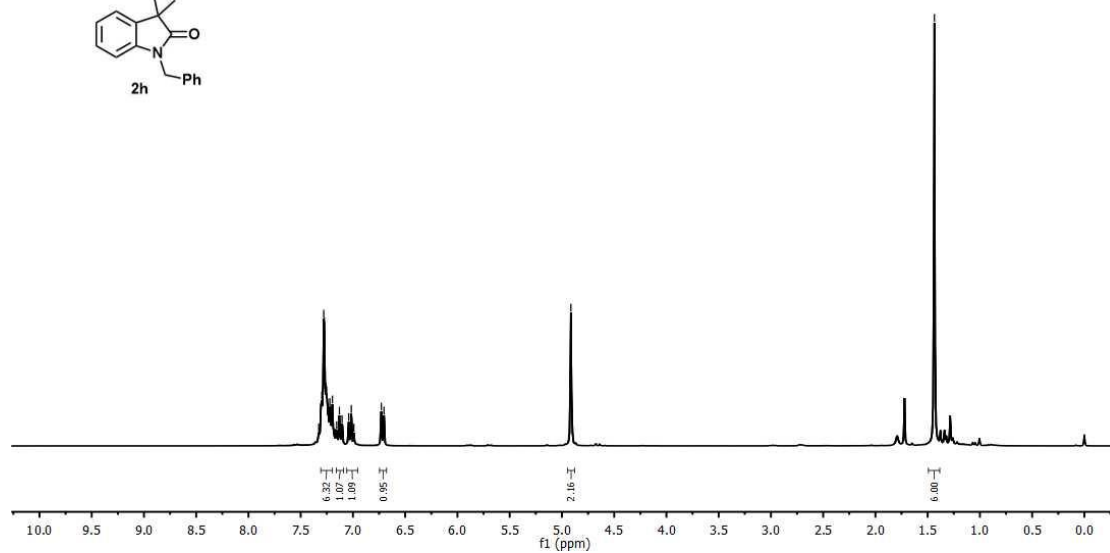

CMW-I-122-3 13C

181.5680

141.7619

136.1971

135.8903

128.8667

127.6735

127.6466

122.6115

122.5274

69.1823

44.2901

18.6244

24.6480

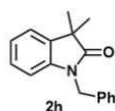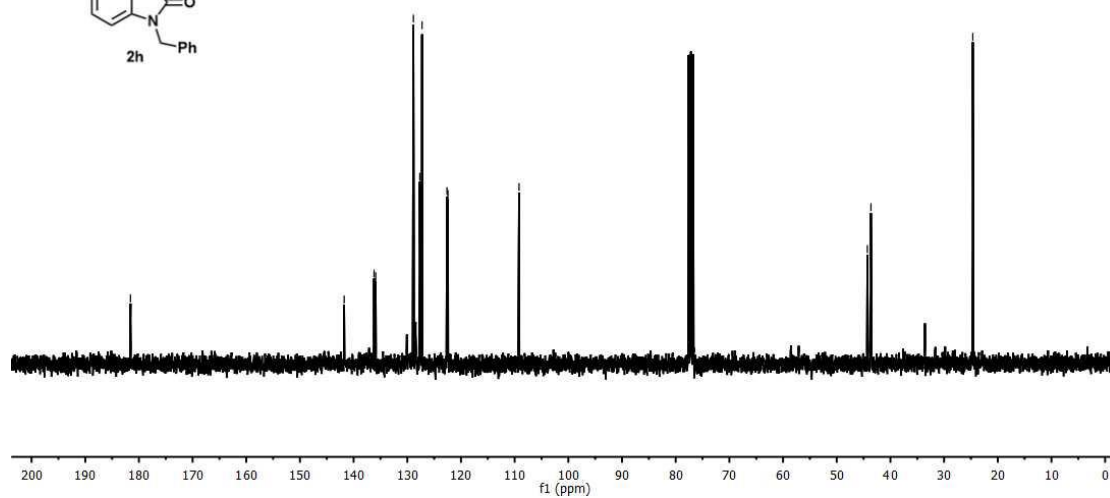

CMW-II-17-3

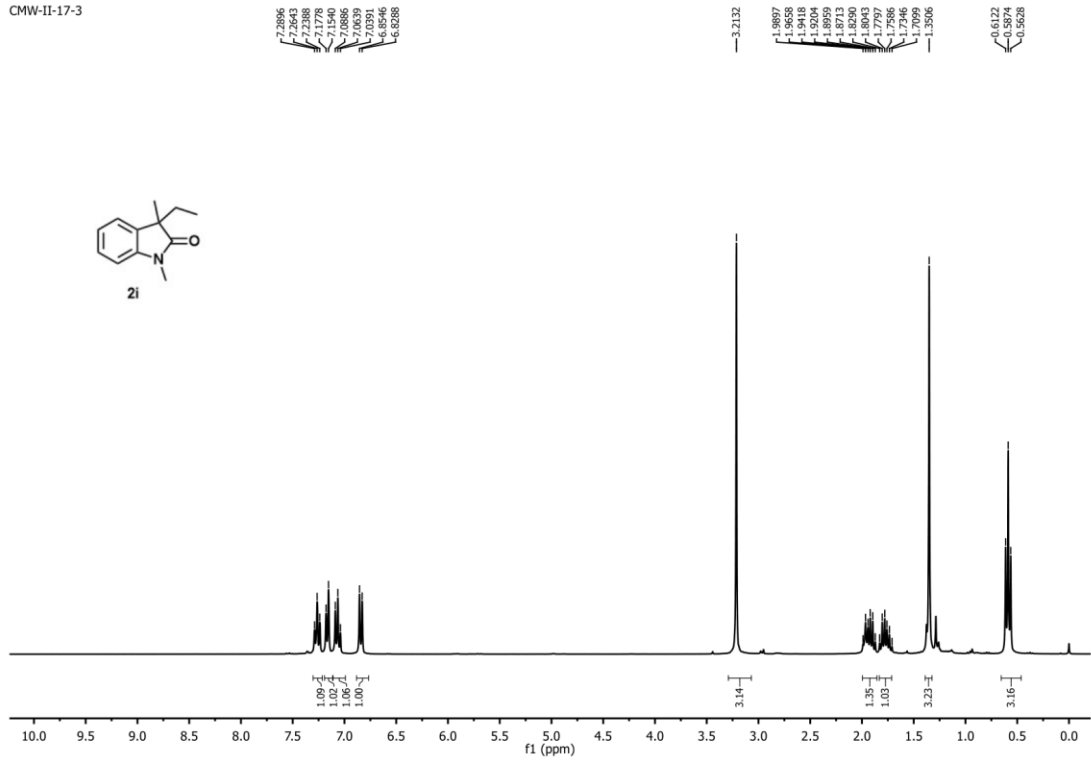

CMW-II-17-3 13C

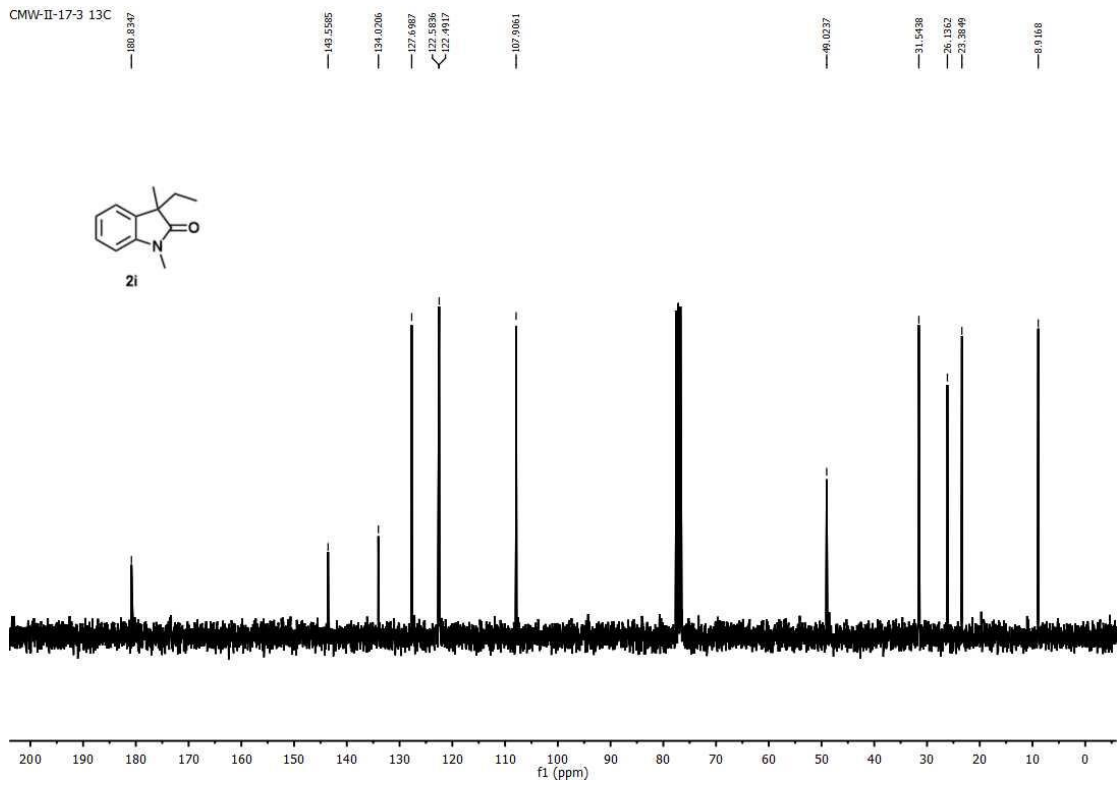

CMW-II-17-1

7.5175  
7.4894  
7.2816  
7.2790  
7.2537  
7.2305  
7.1182  
7.0938  
6.9944  
6.7687

3.1110  
2.7093  
2.5781  
2.4649  
2.4488  
2.4371  
2.4174  
2.4011  
2.3847  
2.3649  
2.3511  
2.3322  
2.3192  
2.2922  
2.2804  
2.2688  
2.2539  
2.2379  
2.2201  
2.1962

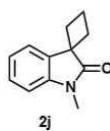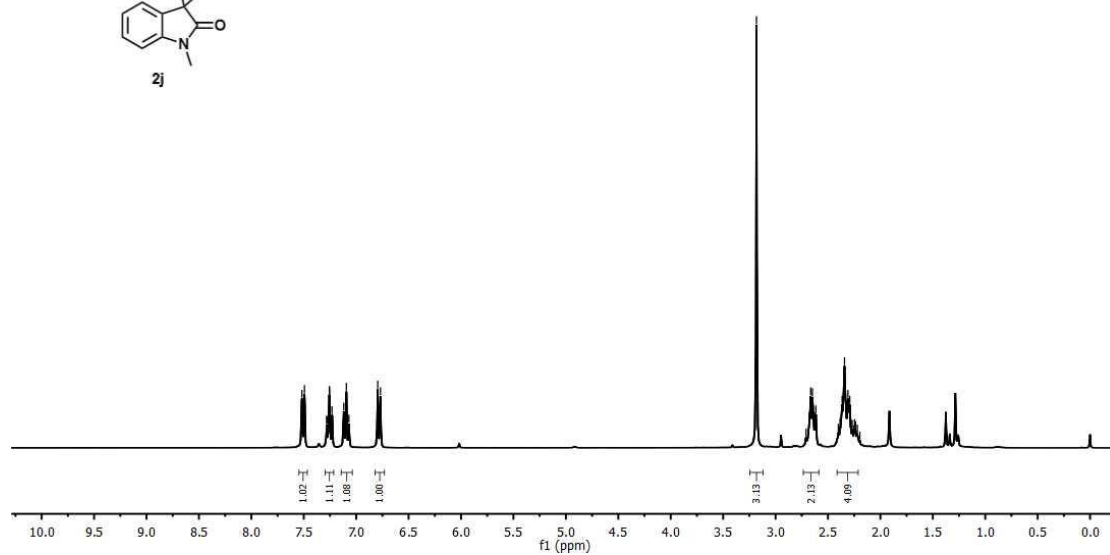

CMW-II-17-1 13C

180.2975

148.0411

134.4056

127.8727

122.6386

122.3176

107.7092

48.2244

31.3631

26.2259

16.8718

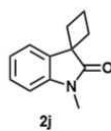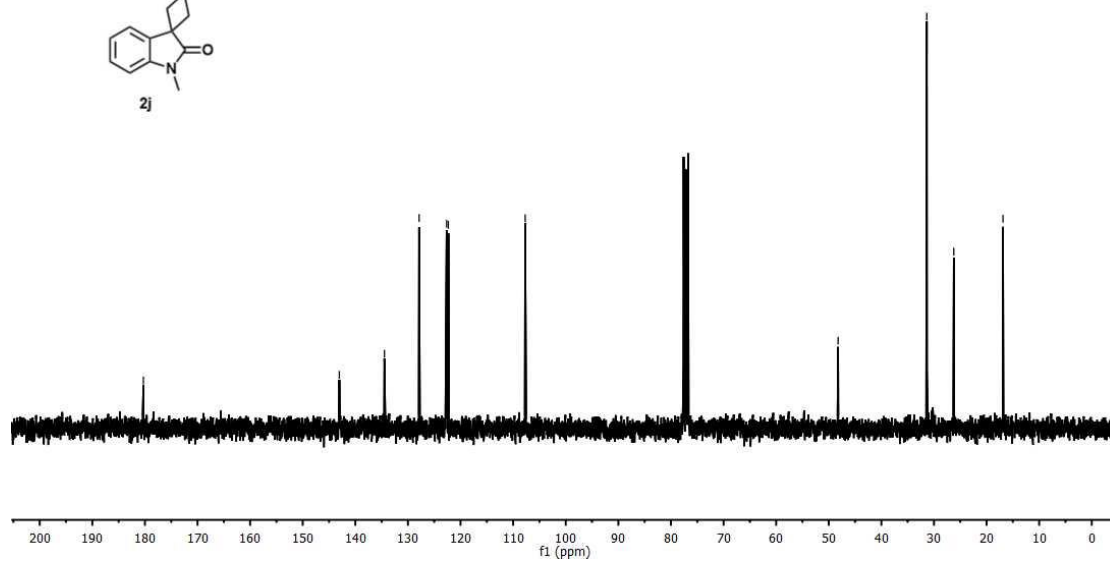

CMW-II-17-2

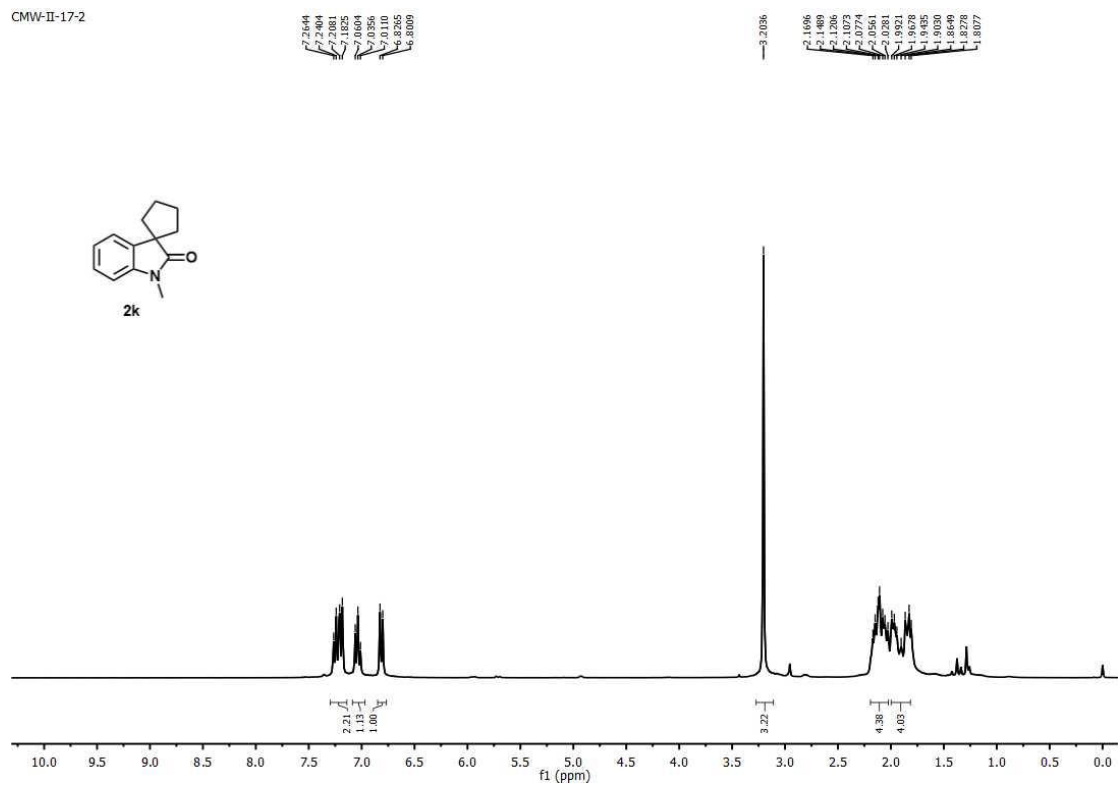

CMW-II-17-2 13C

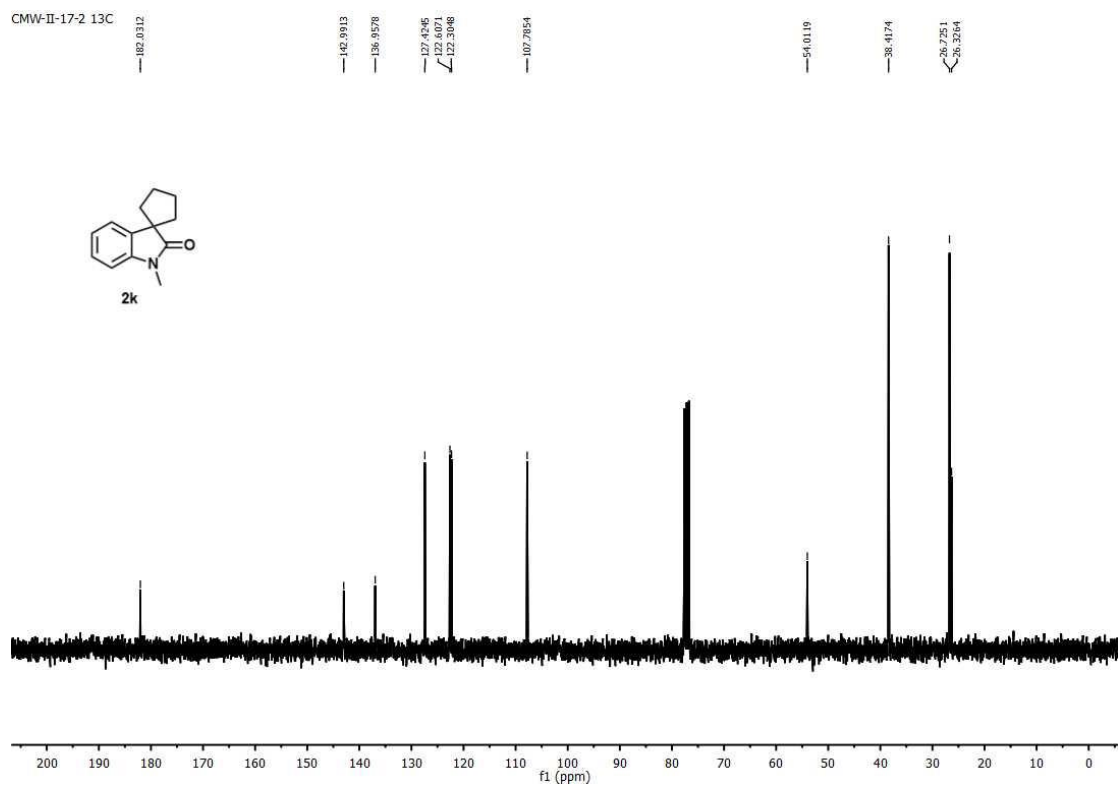

CMW-I-122-8

7.0593  
6.9851  
6.9755  
6.9622  
6.9389  
6.9138

3.5005

2.5879

1.3662

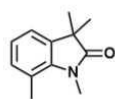

2l

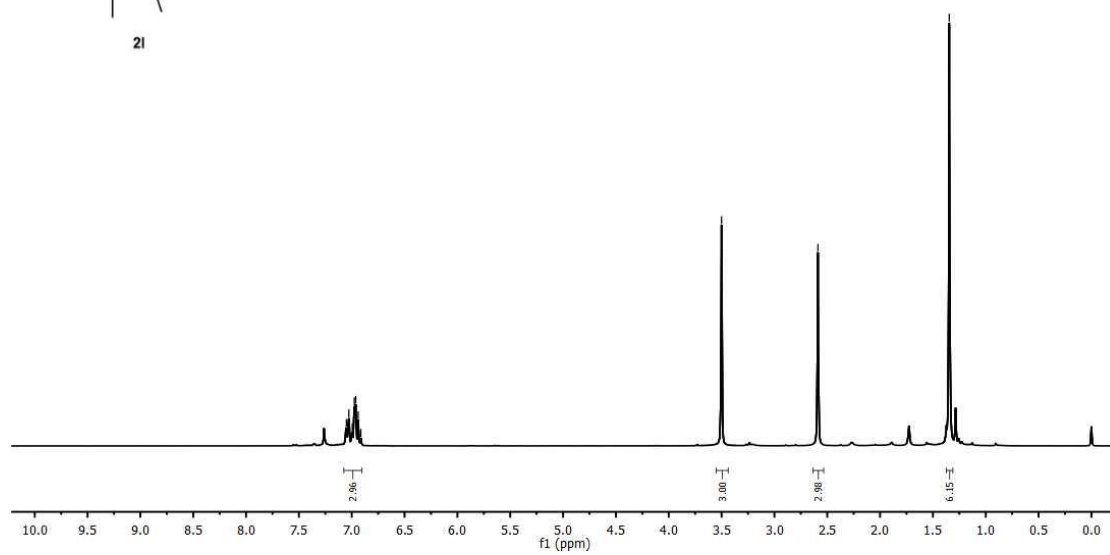

CMW-I-122-8 13C

182.2416

140.4679

136.6399

131.4572

129.5160

120.3305

119.7715

45.5929

29.6431

24.8494

19.1547

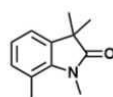

2l

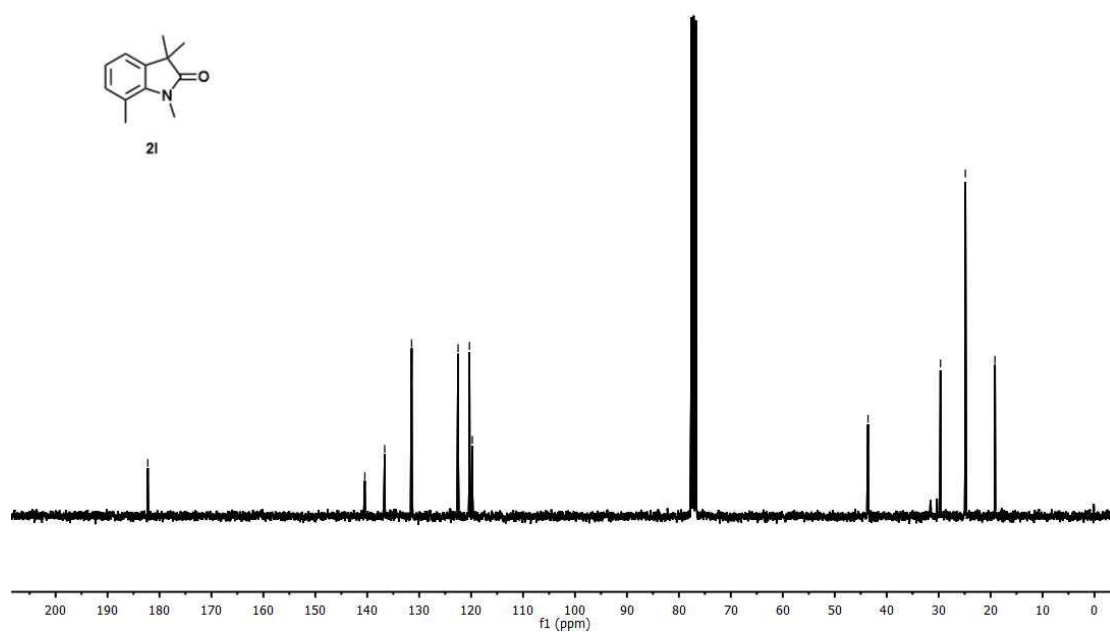

CMW-I-119-9

7.1906  
7.1879  
7.1852  
7.1825  
6.9855  
6.9802  
6.9742

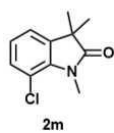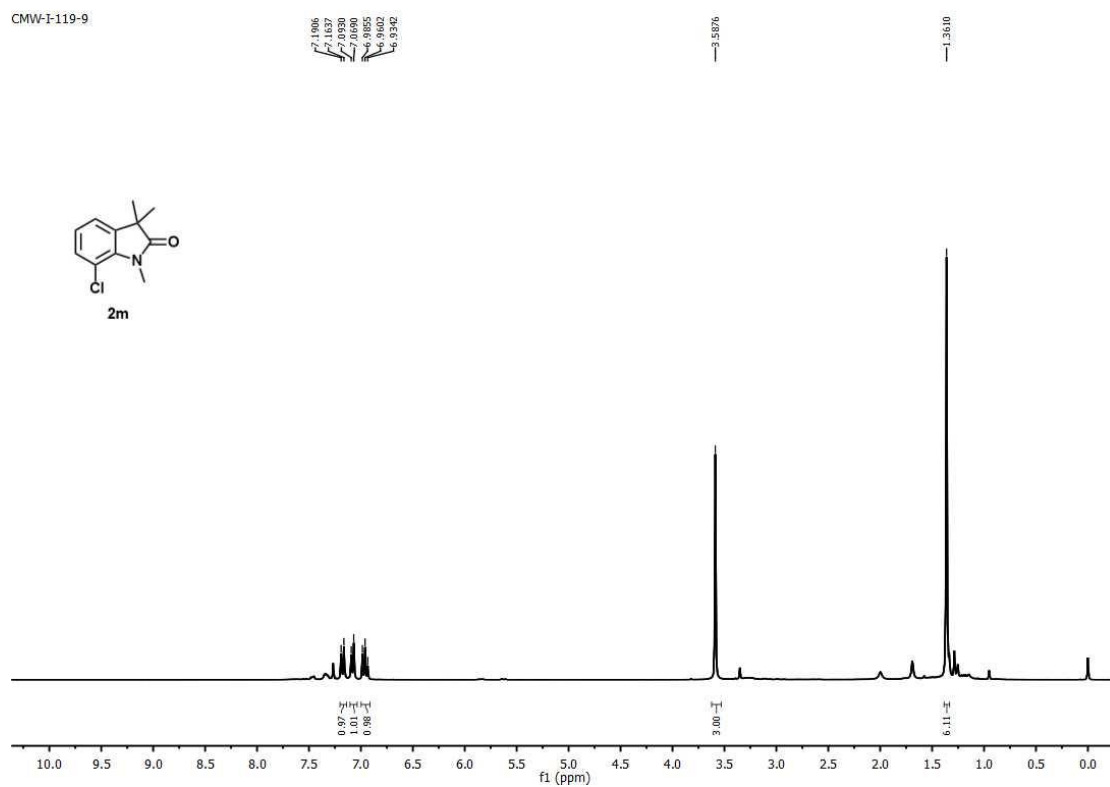

CMW-I-119-9 13C

181.6391

138.7179  
138.6383

130.0747

128.4021

128.3194

116.5660

44.0881

29.6589

29.2579

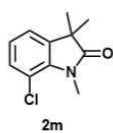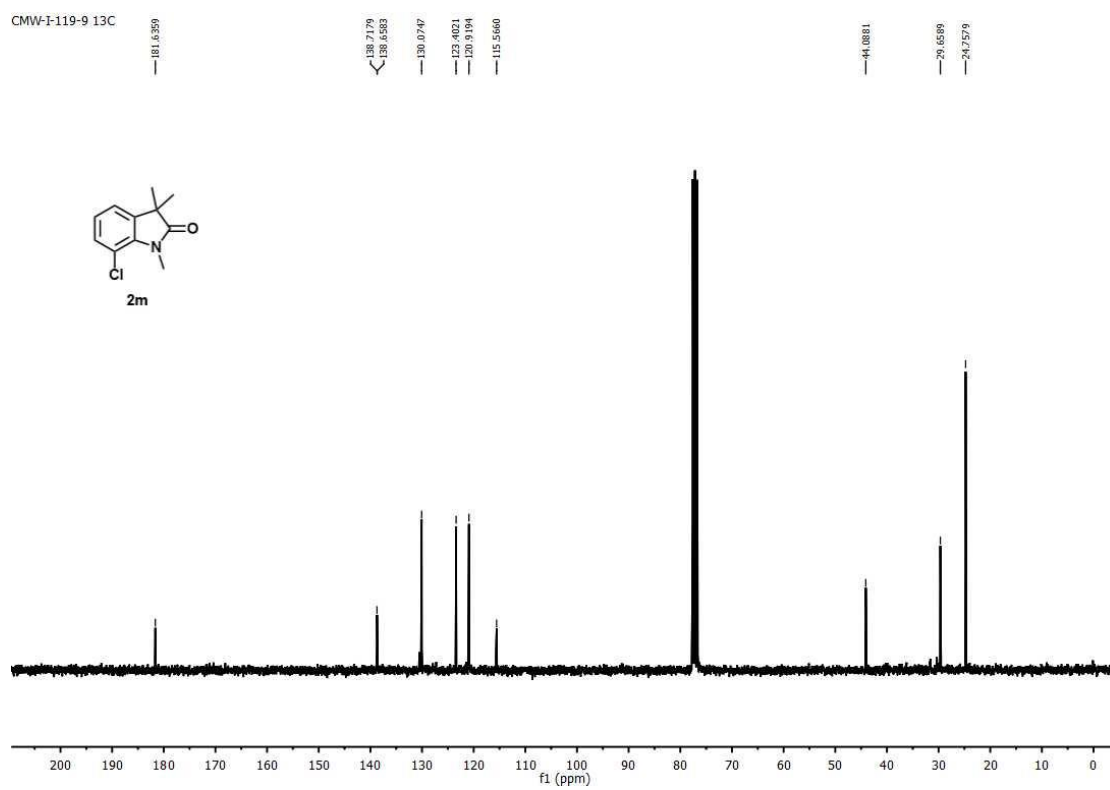

CMW-I-183-2

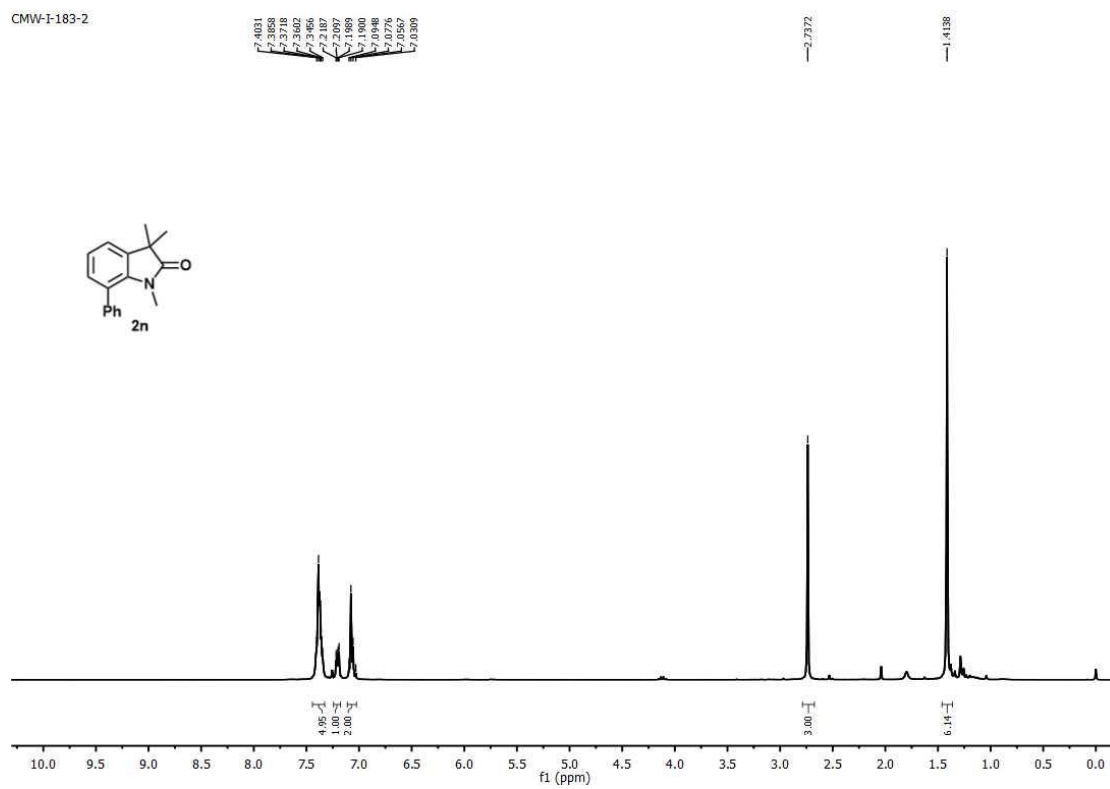

CMW-I-183-2 13C

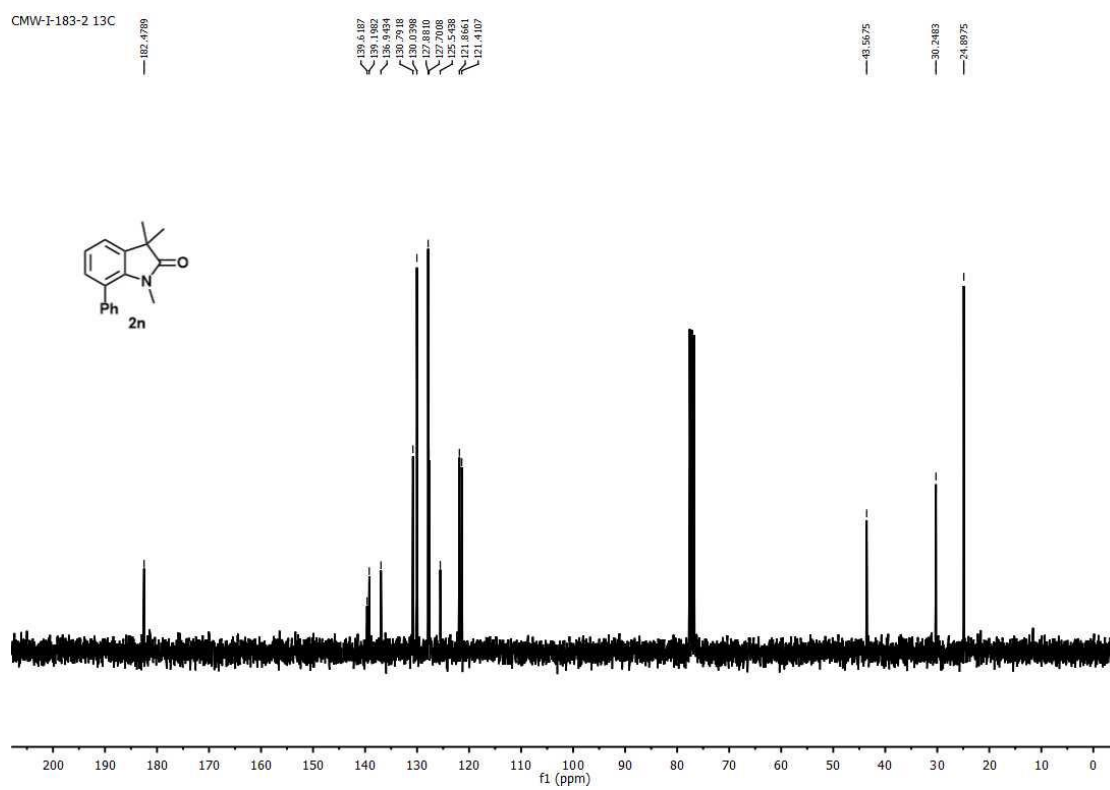

CMW-I-119-4

7.1878  
7.1619  
7.1500  
7.0985  
7.0737  
6.8386  
6.8167  
6.8125  
6.7086  
6.6822

3.2007

2.4085  
2.3872

1.4503  
1.3509

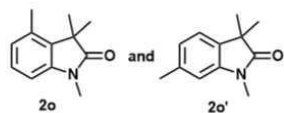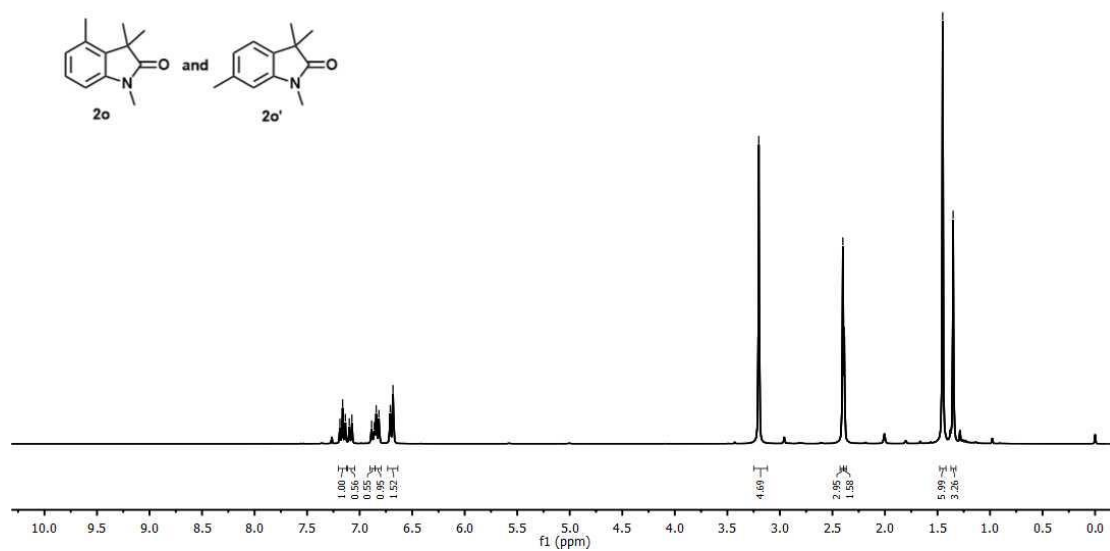

CMW-I-119-4 13C

181.7628  
181.4428

142.7622  
142.7848  
137.7897  
137.7897  
132.9893  
132.6351  
127.5212  
126.0950  
122.9605  
122.8492

69.0513  
68.8497

46.0218  
44.0154

26.3529  
26.2762  
24.5279  
24.4722  
21.8289  
18.1937

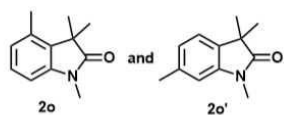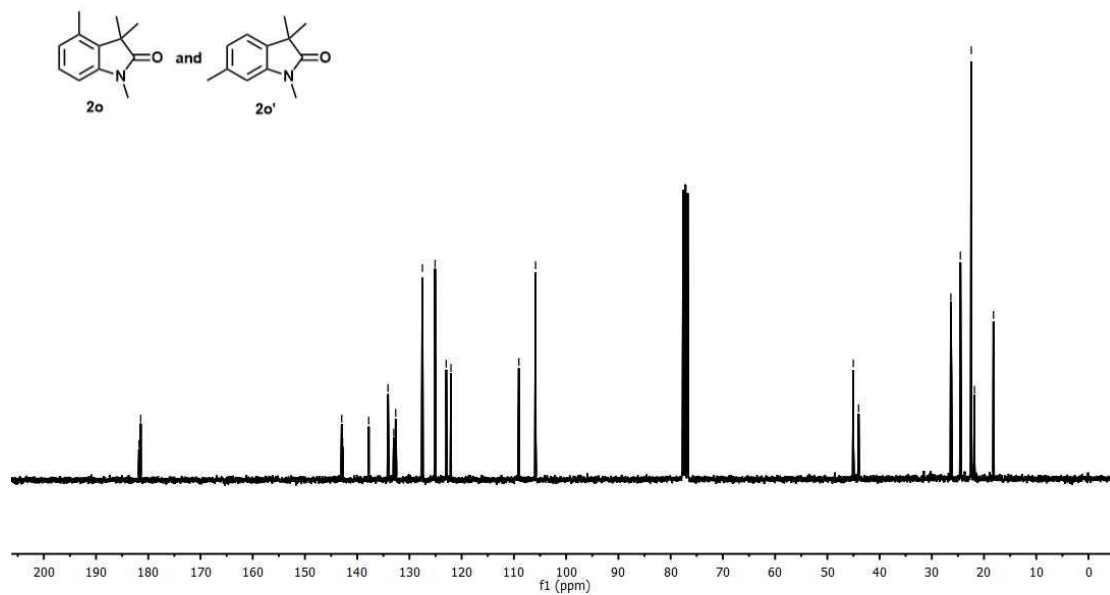



CMW-I-119-7 Again

7.1812  
7.1580  
7.1467  
7.1467  
7.1226  
7.0954  
6.8000  
6.7765  
6.7765

3.2073

1.3223

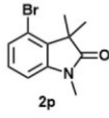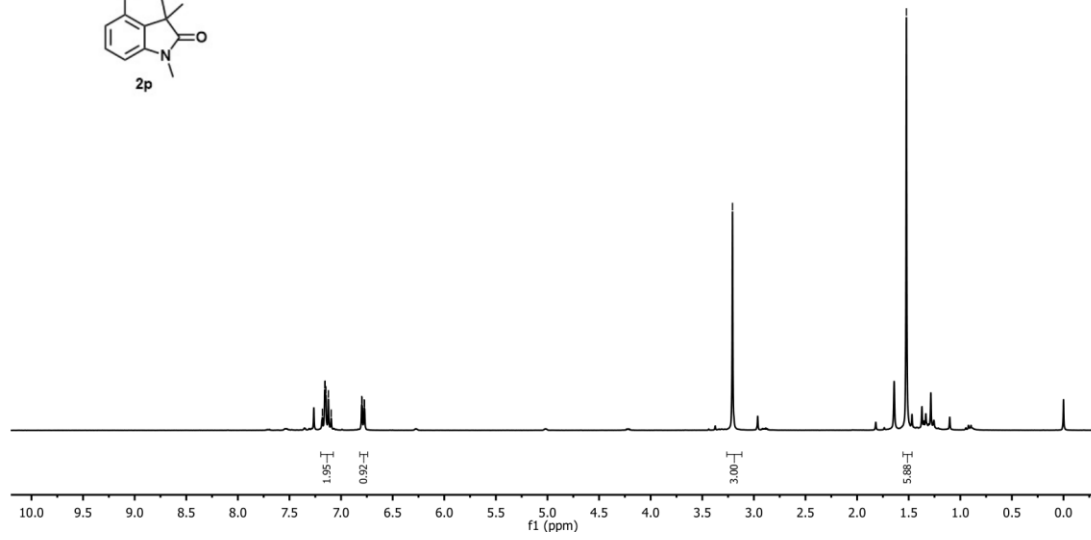

CMW-I-119-7 Again 13C

188.8851

144.8178

133.3686

129.2290

126.8695

118.8580

107.1779

46.5877

26.5006

21.4921

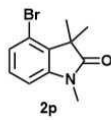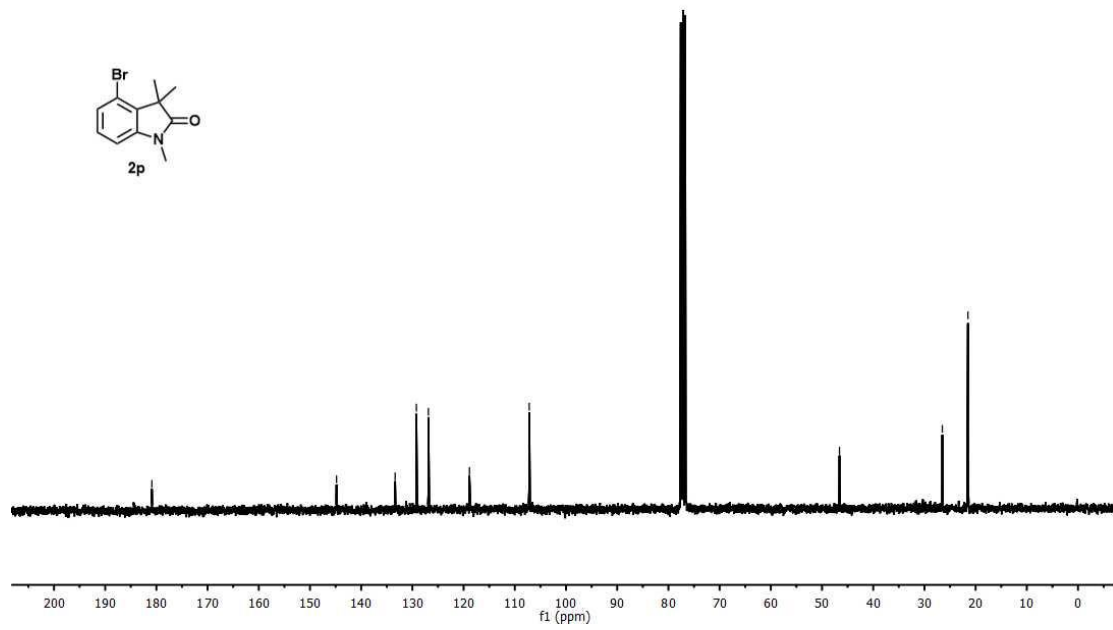

CMW-I-119-1

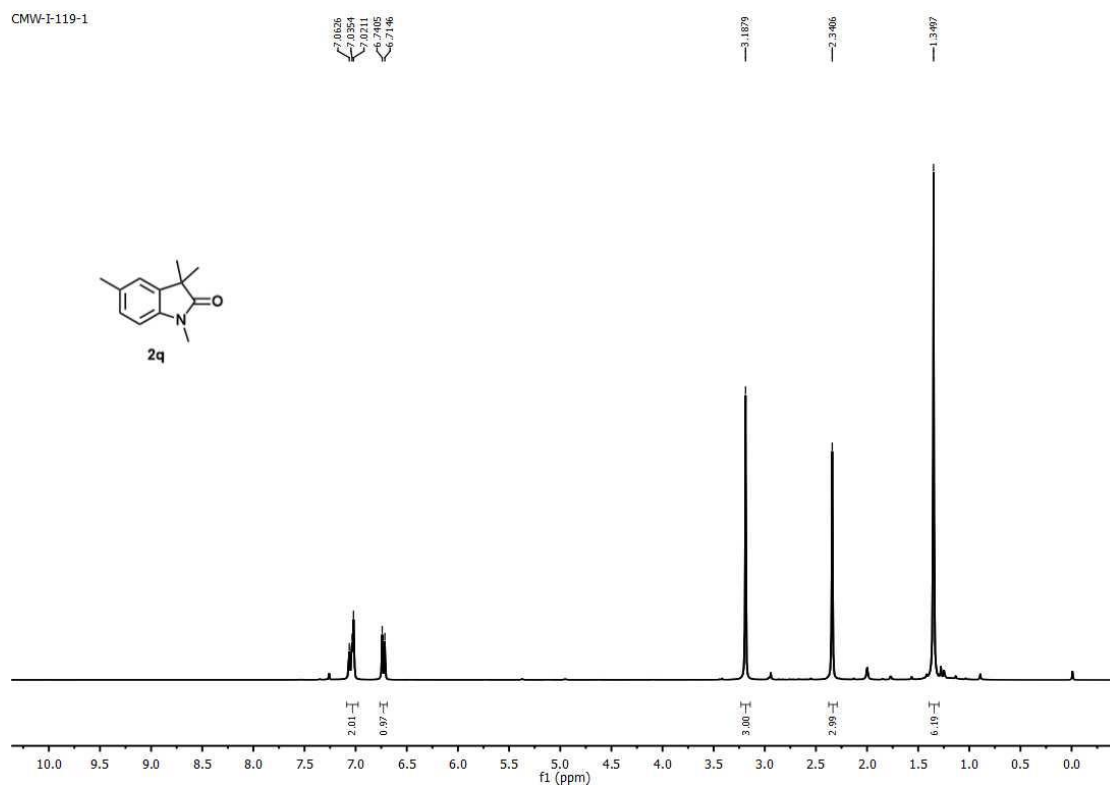

CMW-I-119-1 13C

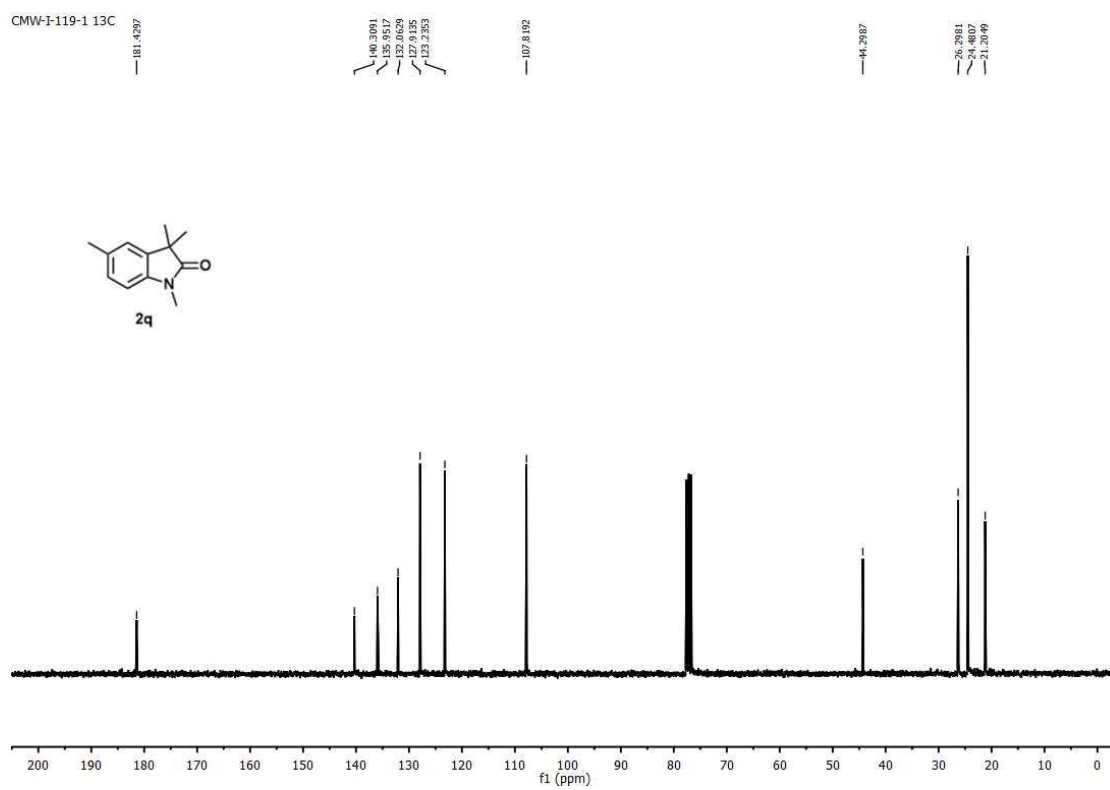

CMW-I-119-2

6.736  
6.7306  
6.7306  
6.7306  
6.7306  
6.7306  
6.7306  
6.7306  
6.7306  
6.7306

3.8009

3.1886

1.3572

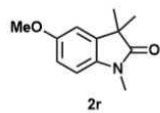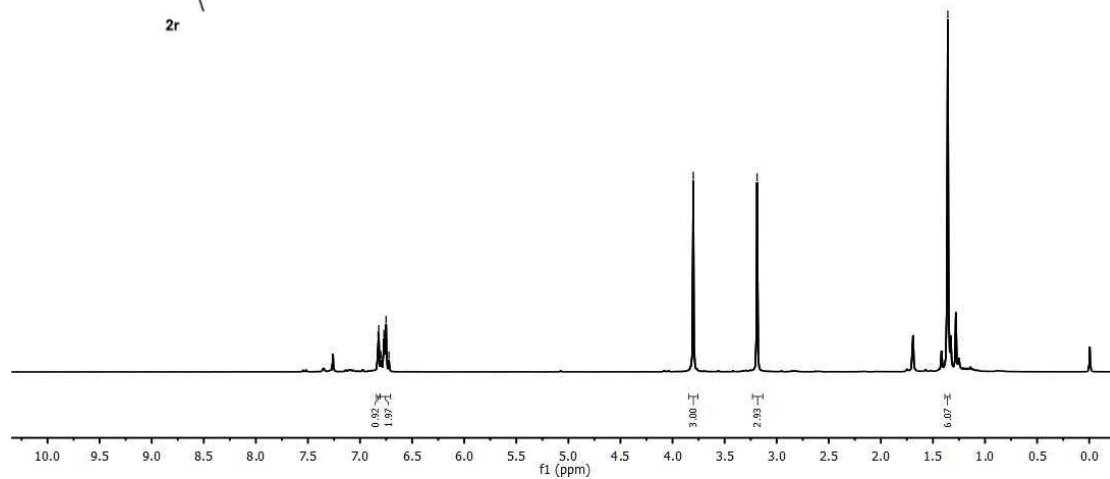

CMW-I-119-2 13C

181.1841

156.2178

137.4052

136.3168

111.7027

110.2125

108.3488

55.9640

47.529

26.4122

24.5411

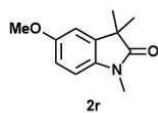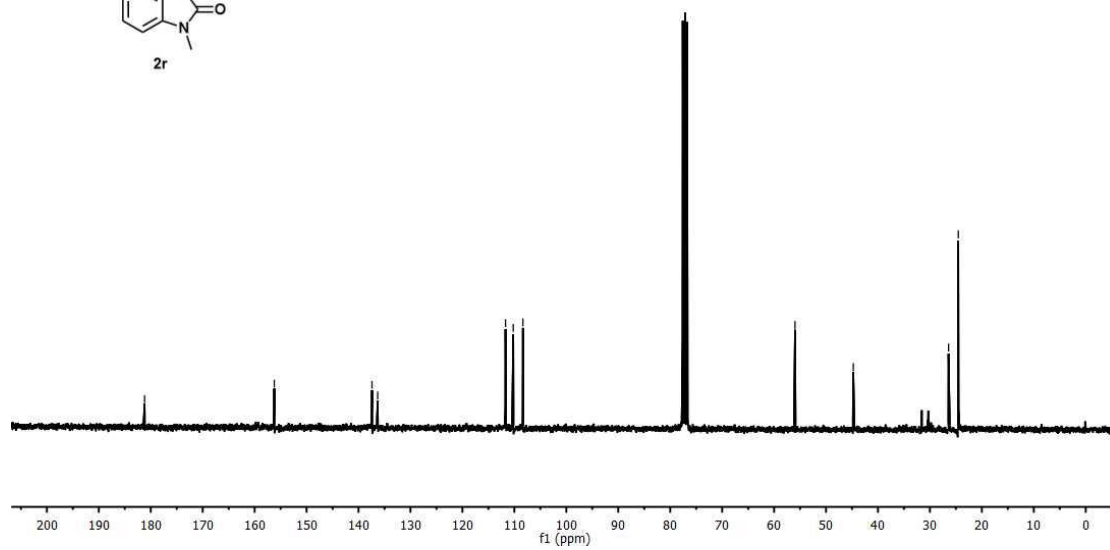

CMW-I-189

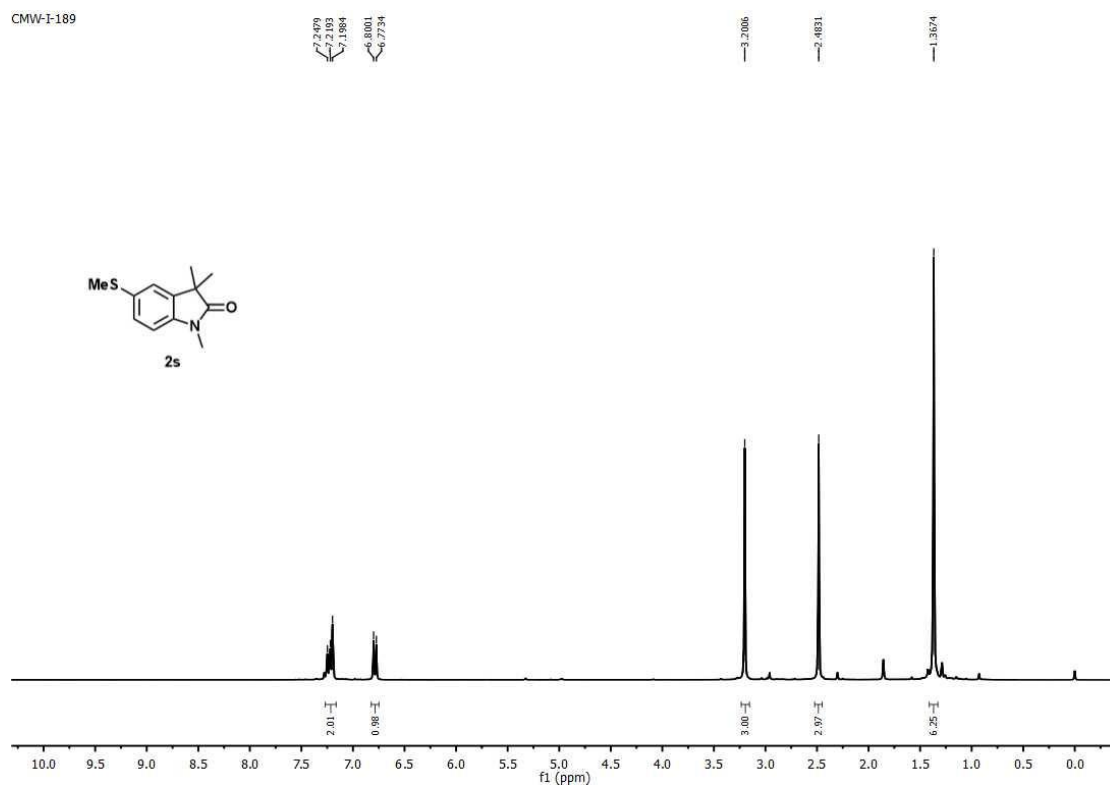

CMW-I-189 13C

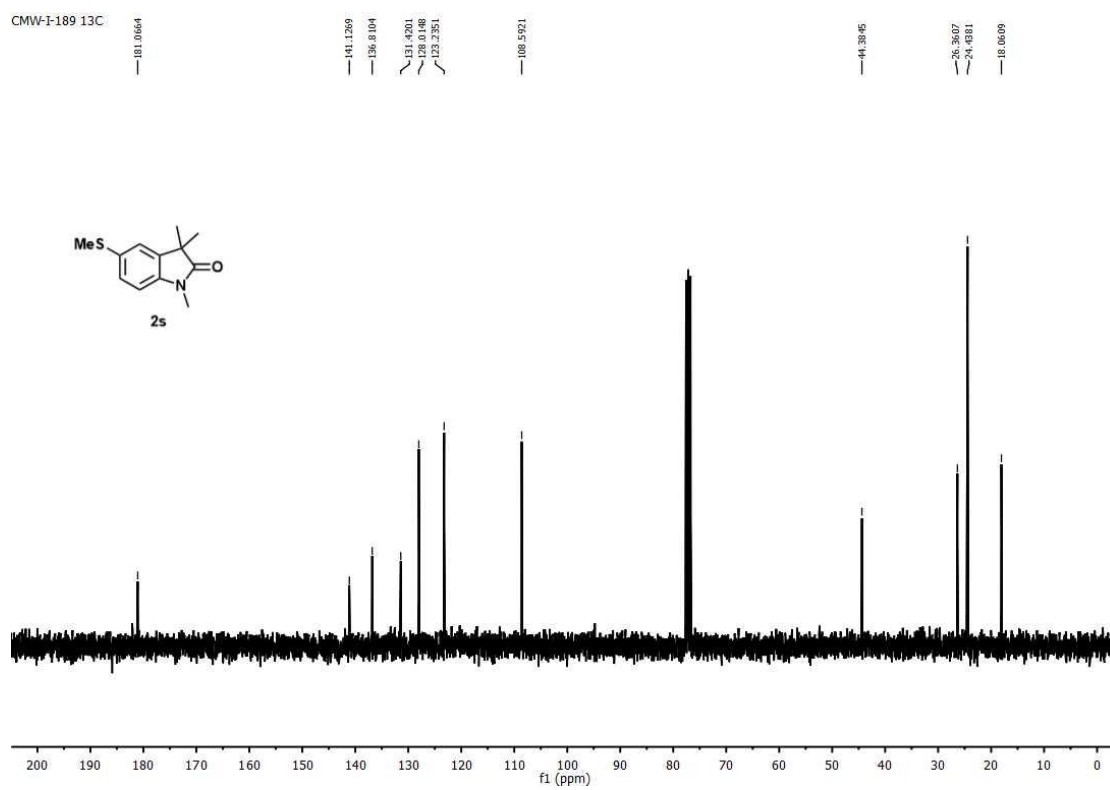

CMW-I-174-1

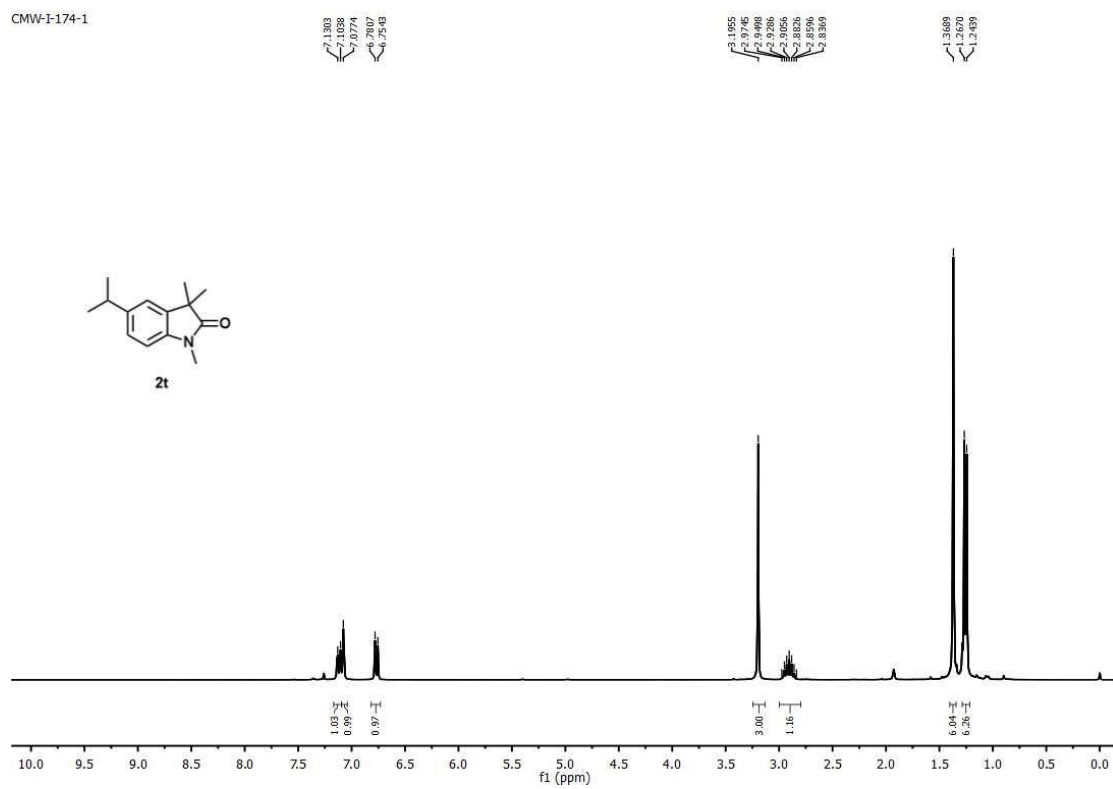

CMW-I-174-1 13C

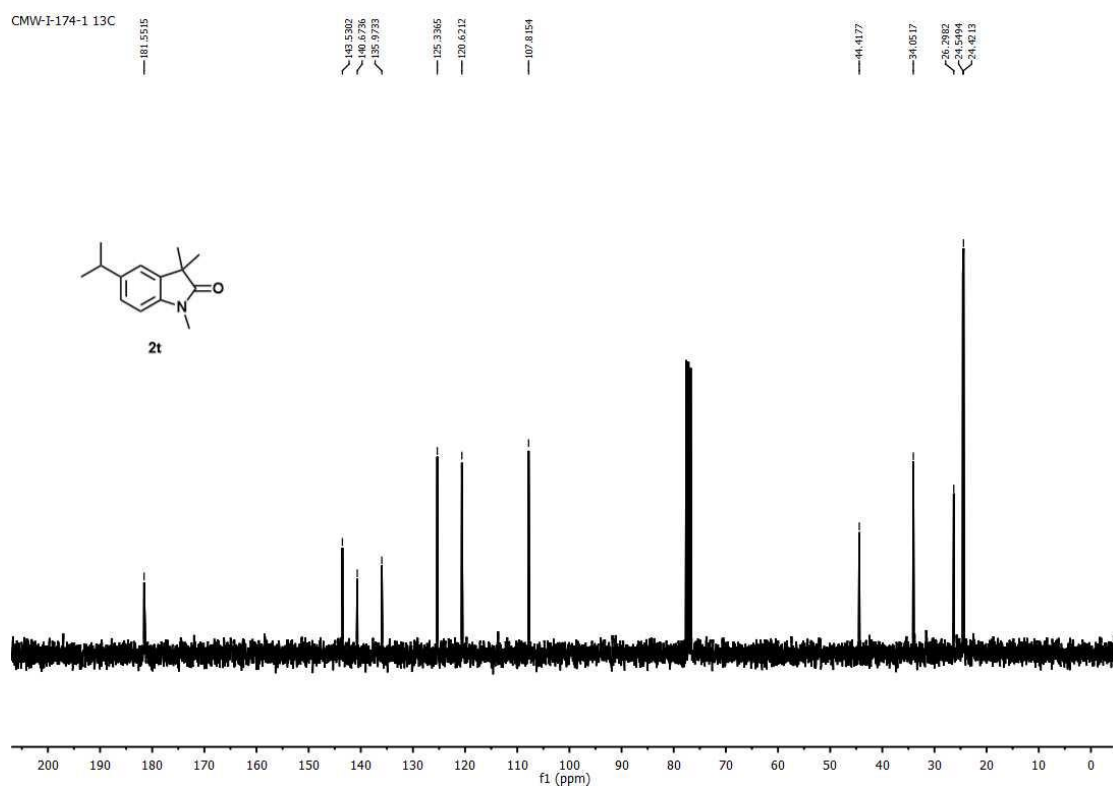

CMW-I-174-2

7.3045  
7.2984  
7.2775  
7.2715  
7.2489  
7.2387  
6.7909  
6.7639

3.2002

1.3756  
1.3320

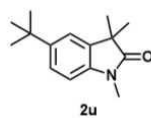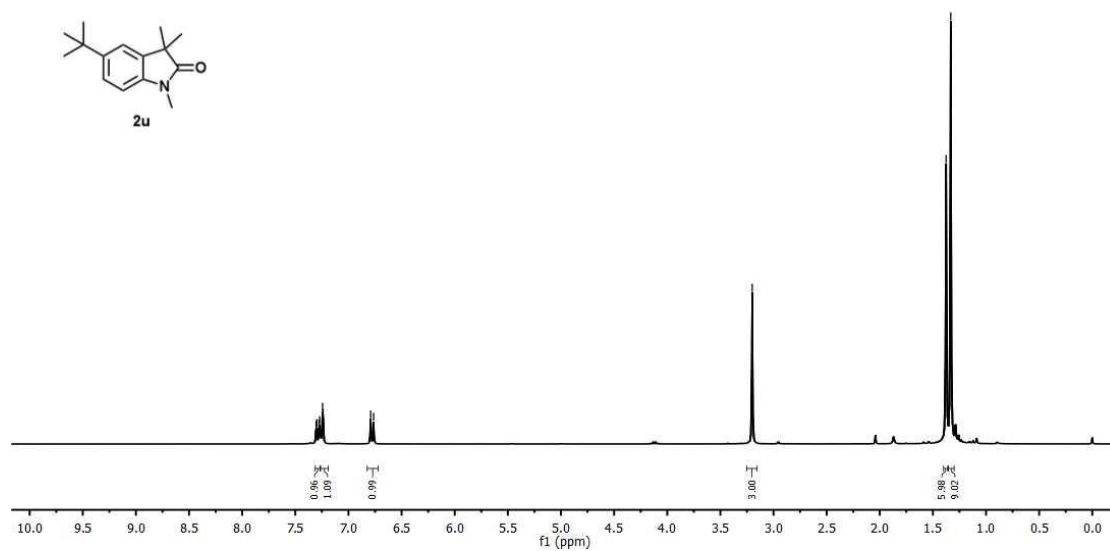

CMW-I-174-2 13C

181.6552

146.8541

140.3811

135.6381

124.3075

119.4732

107.4884

44.5126

34.6987

31.7652

26.2992

21.3418

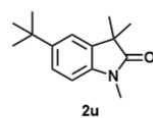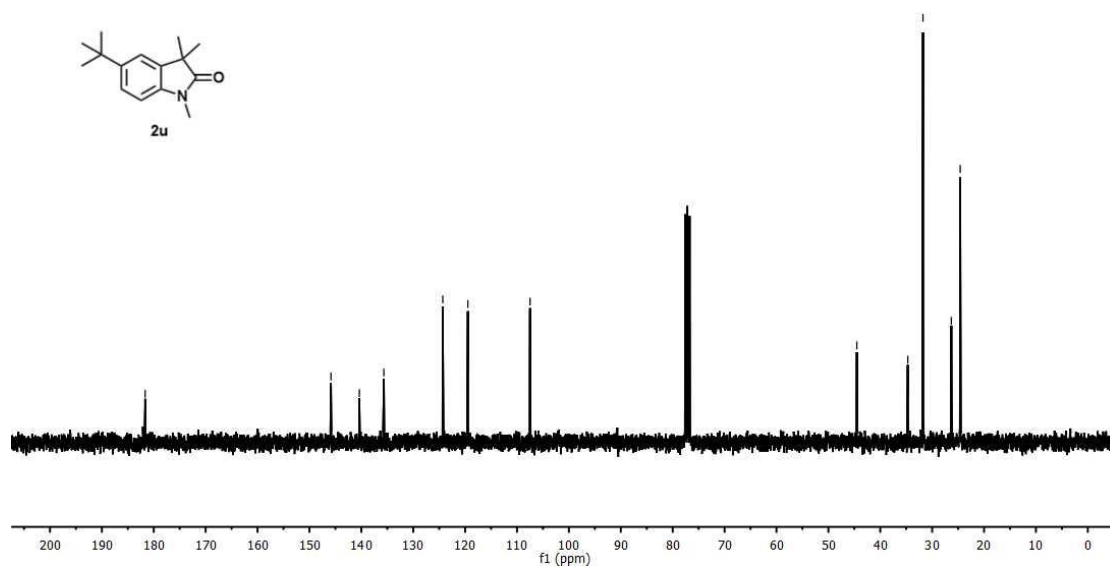

CMW-I-187

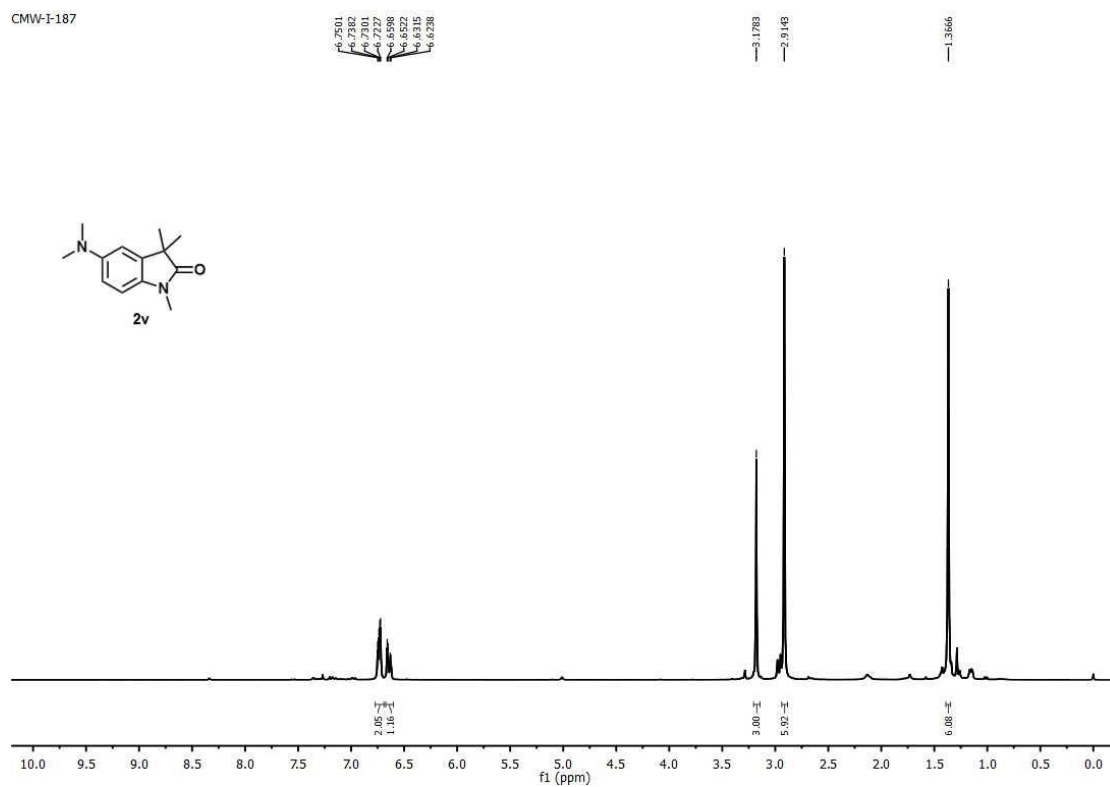

CMW-I-187 13C

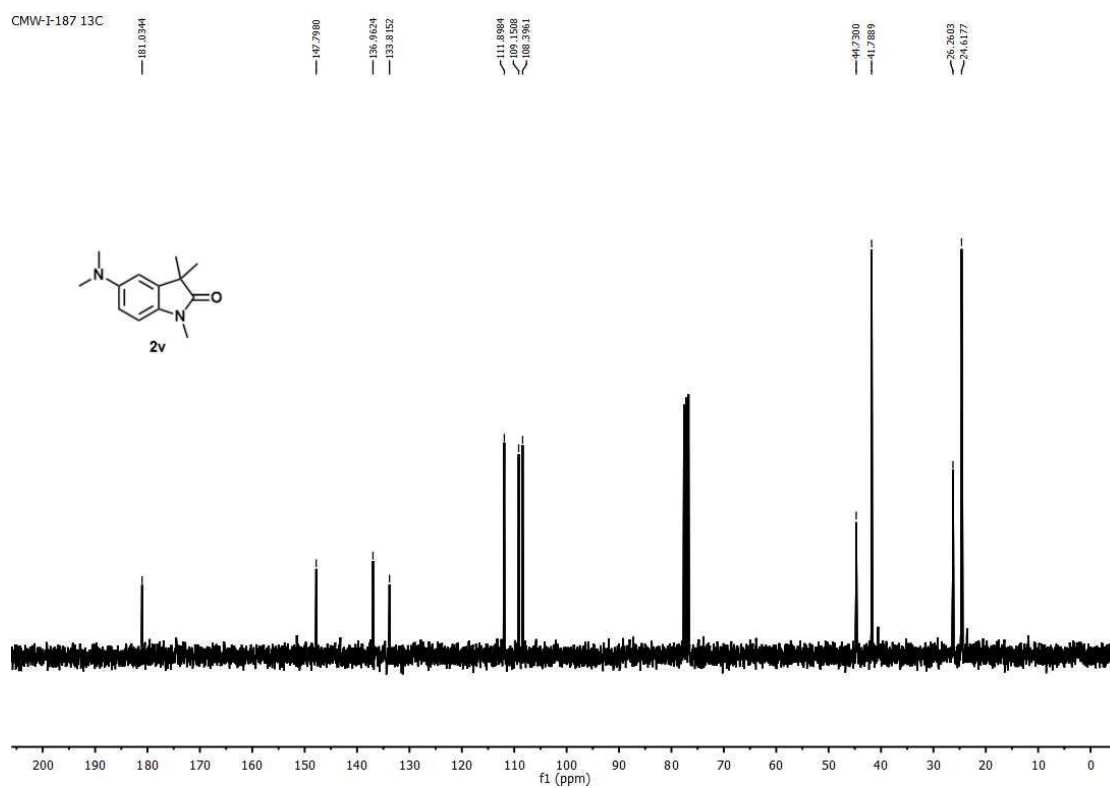

CMW-I-175

7.5709  
7.5463  
7.4974  
7.4921  
7.4652  
7.4479  
7.4251  
7.3979  
7.3378  
7.2883  
6.9097  
6.8830

3.2347

1.4157

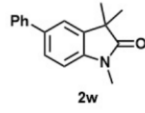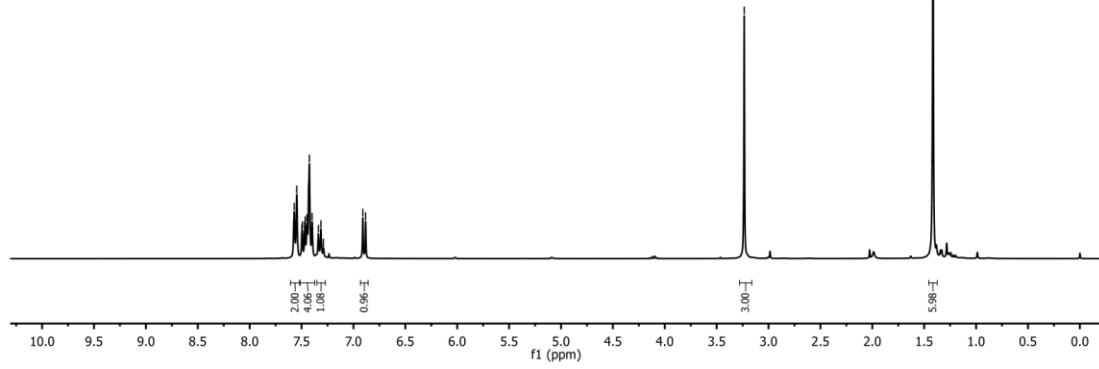

CMW-I-175 13C

181.4361

142.1247  
141.1372  
136.4672  
136.0599  
138.8708  
127.0498  
126.6876  
121.3141

108.3104

44.4017

26.3688  
24.5082

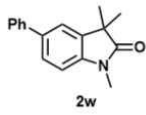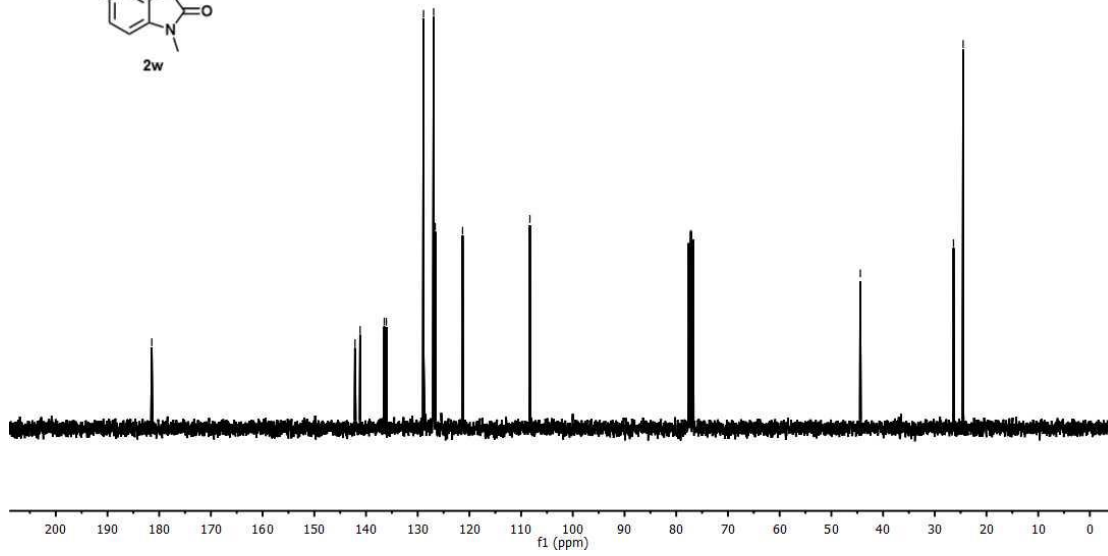



CMW-I-188

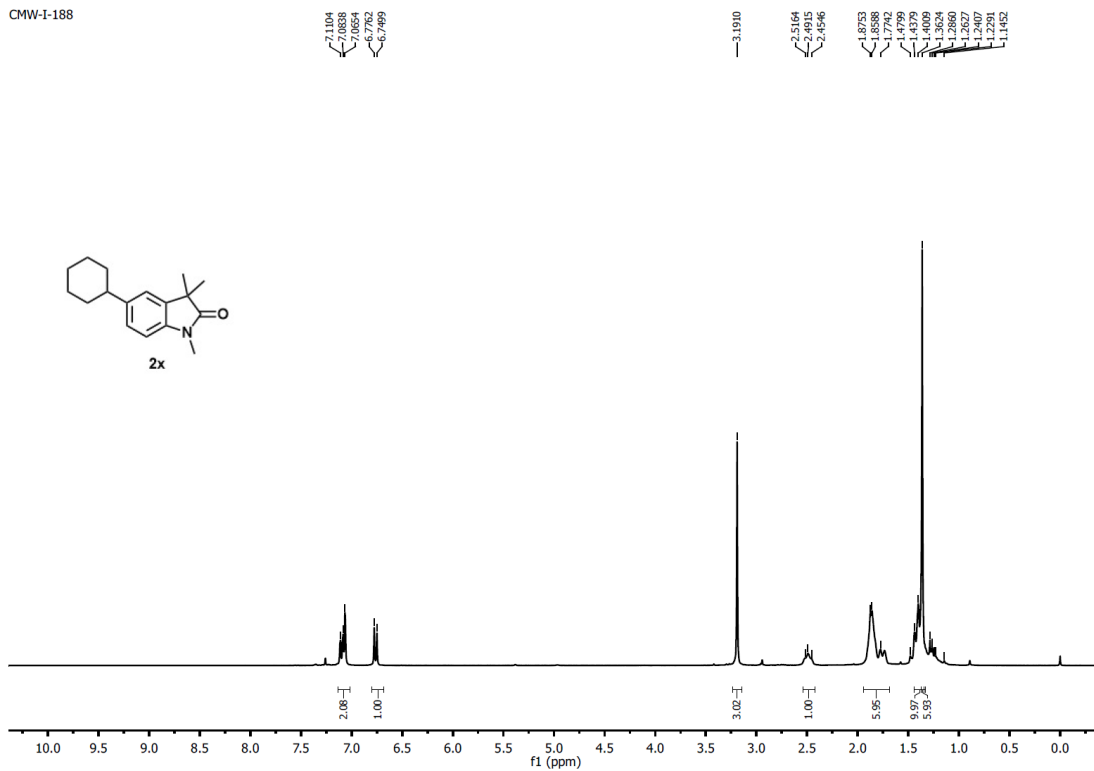

CMW-I-188 13C

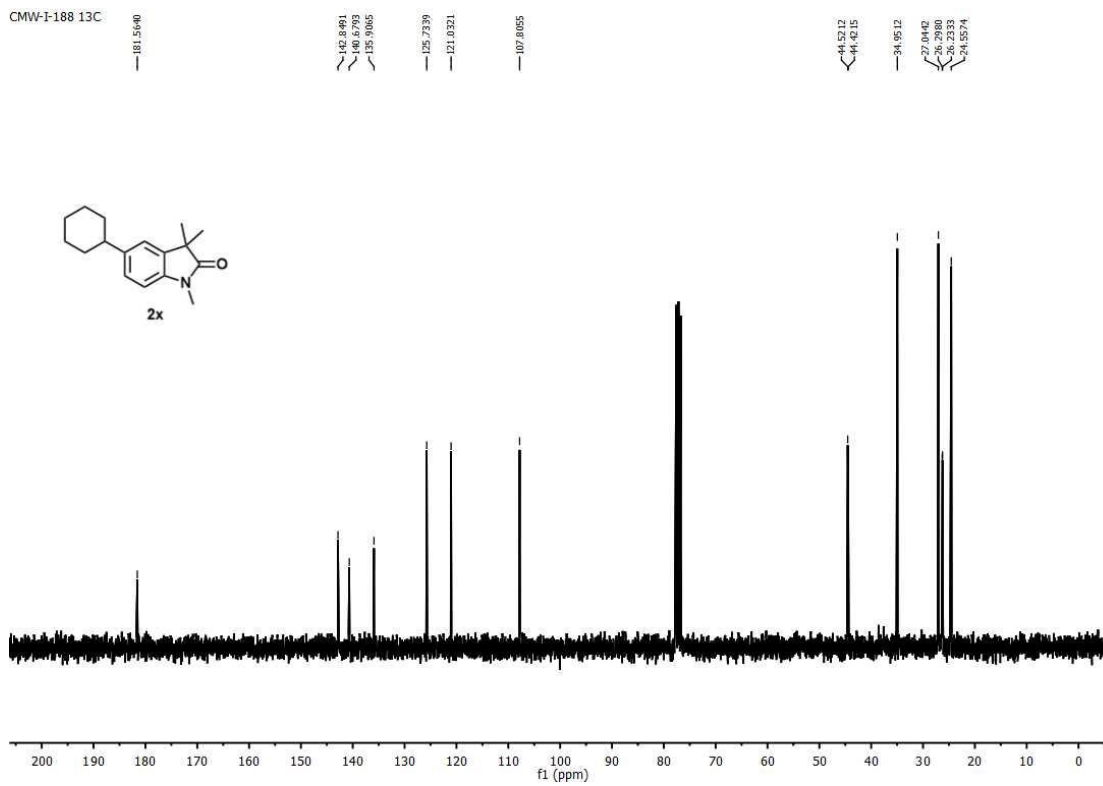

CMW-I-119-3

6.9829  
6.9824  
6.9824  
6.9540  
6.9441  
6.9362  
6.9362  
6.7982  
6.7515  
6.7375

3.2078

1.3687

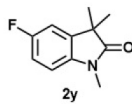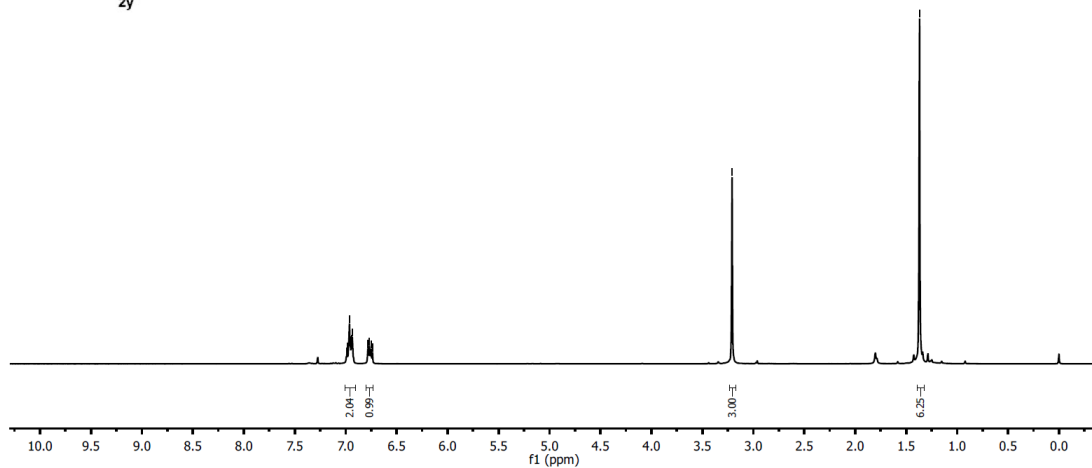

CMW-I-119-3 19F

120.8180  
120.8127  
120.8098  
120.8130  
120.8177  
120.8187

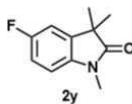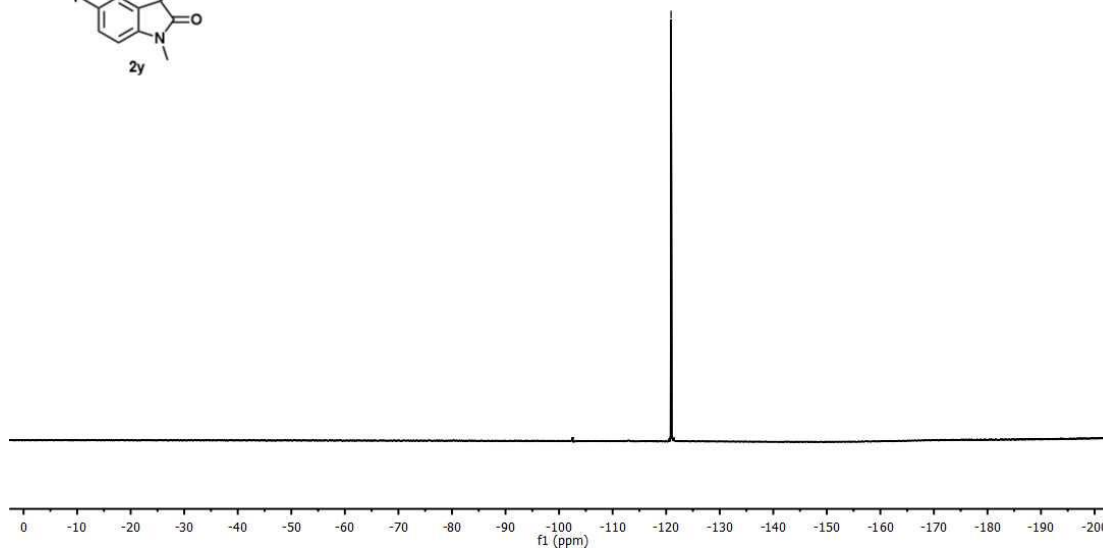

CMW-I-119-3 13C

181.0925

161.1153

159.932

138.6419

137.6516

137.5479

114.0008

113.6896

110.7577

108.7727

108.5755

108.4675

44.7917

41.7694

26.4507

21.3884

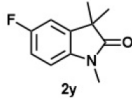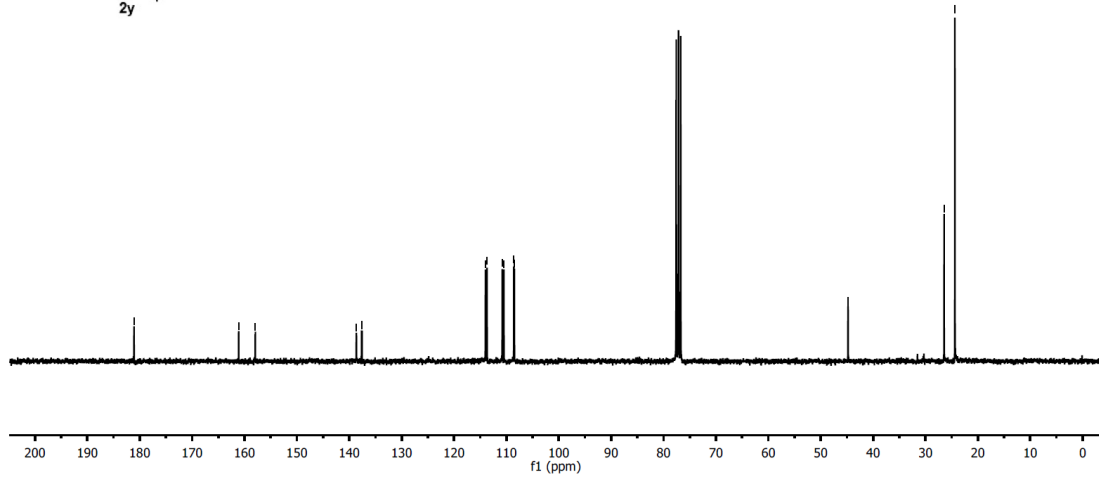

CMW-I-119-5

7.2563

7.2486

7.2229

7.2162

7.1886

7.1774

6.7571

3.2054

1.3675

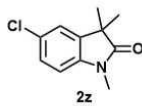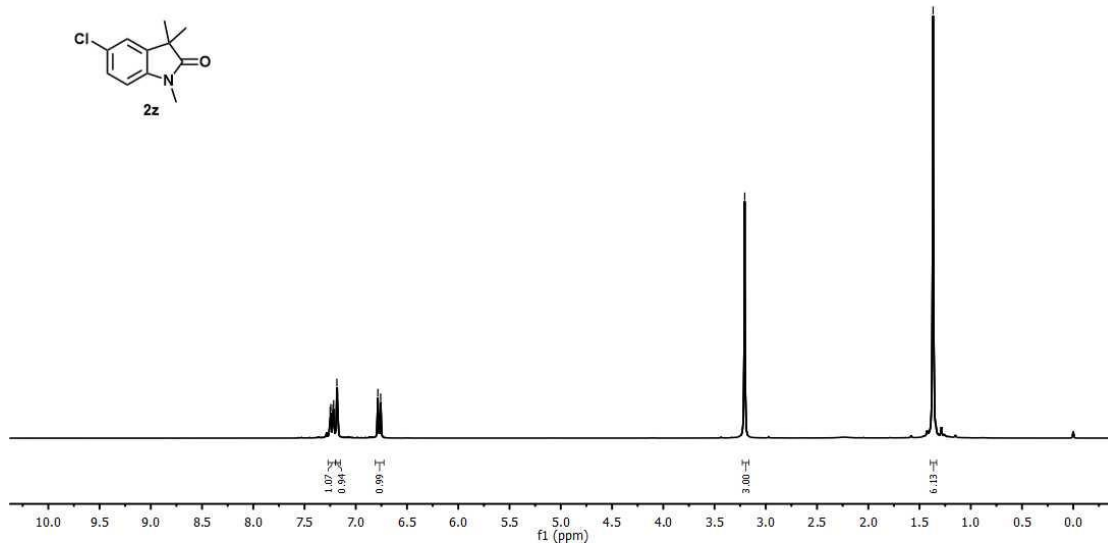

CMW-I-119-5 13C

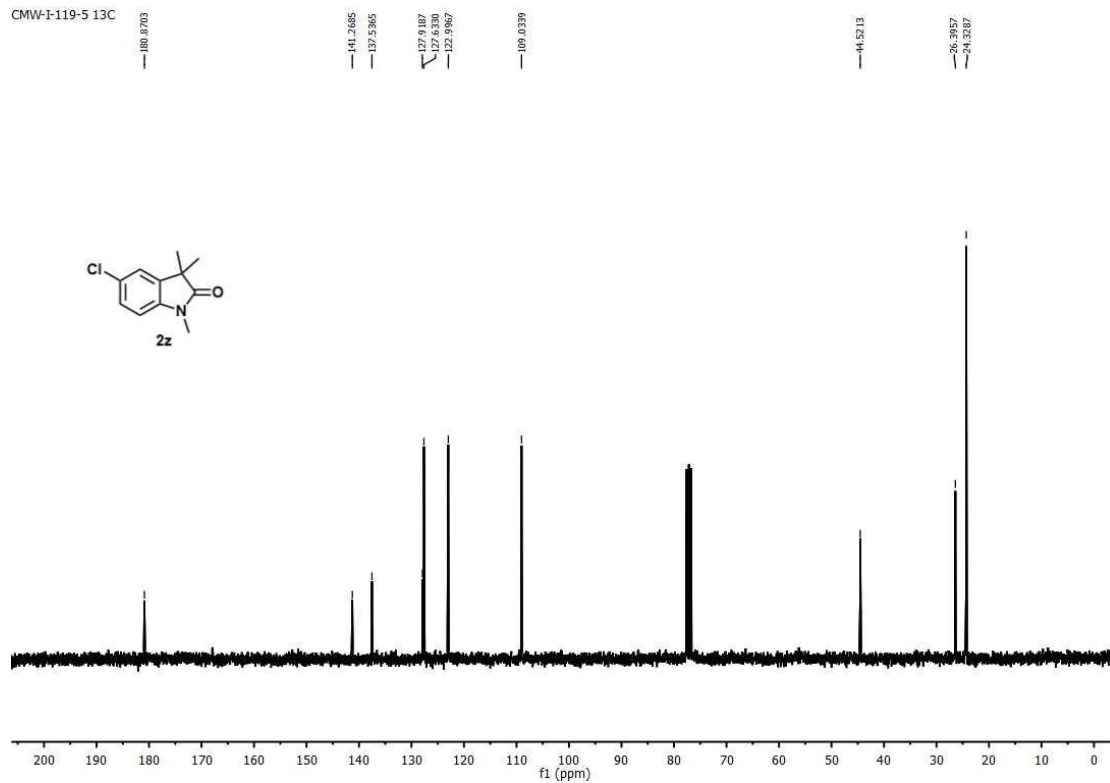

CMW-I-148

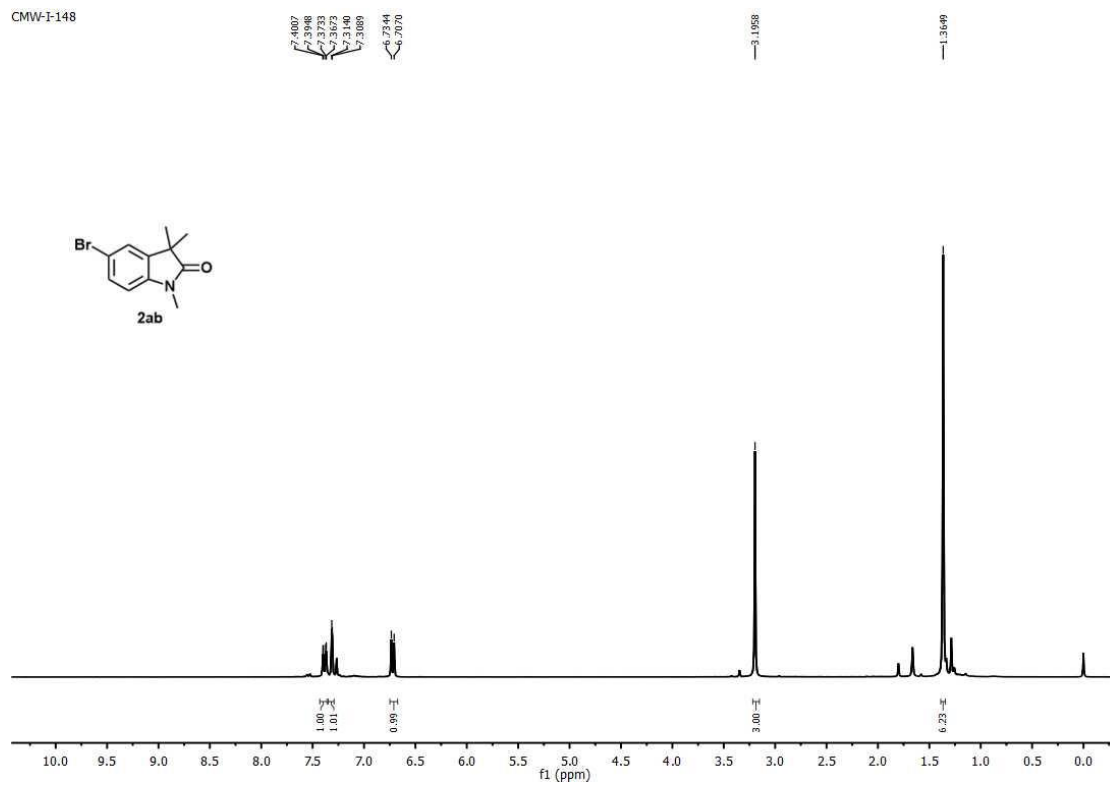

CMW-I-148 13C

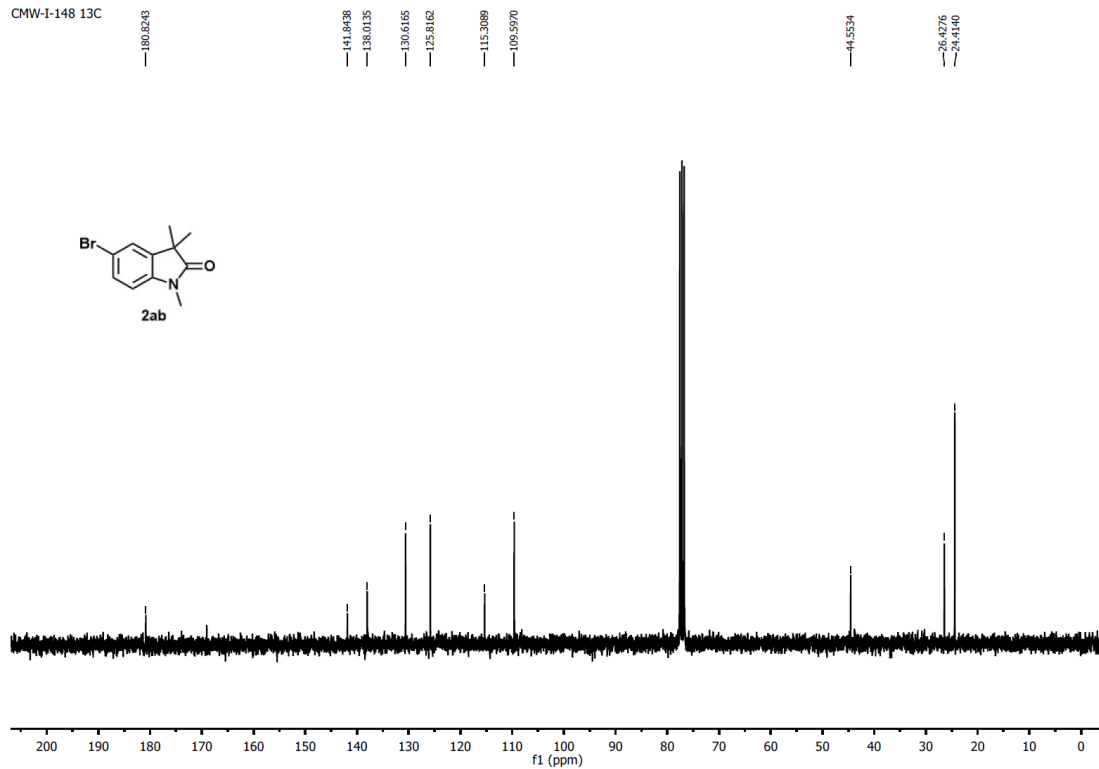

CMW-I-186

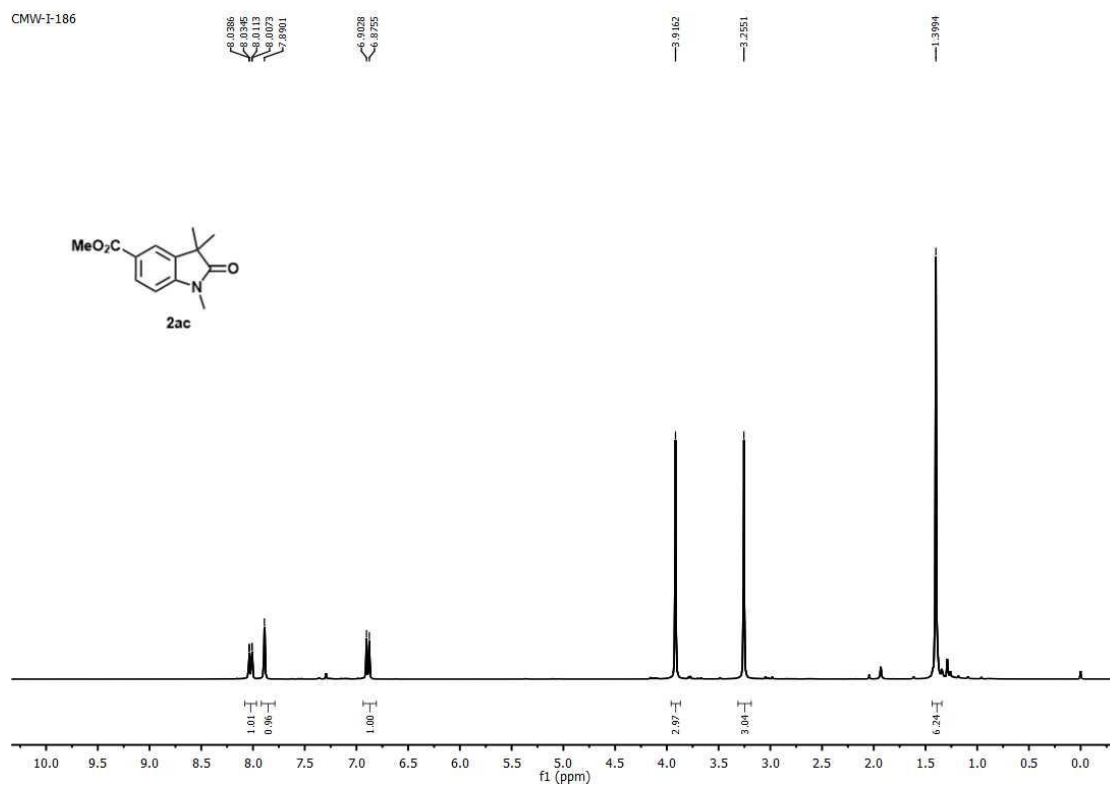

CMW-I-186 13C

181.6571  
167.0346  
146.9185  
135.7877  
130.5377  
124.8105  
123.6168  
107.6140  
52.0866  
41.0809  
26.4738  
24.3209

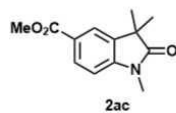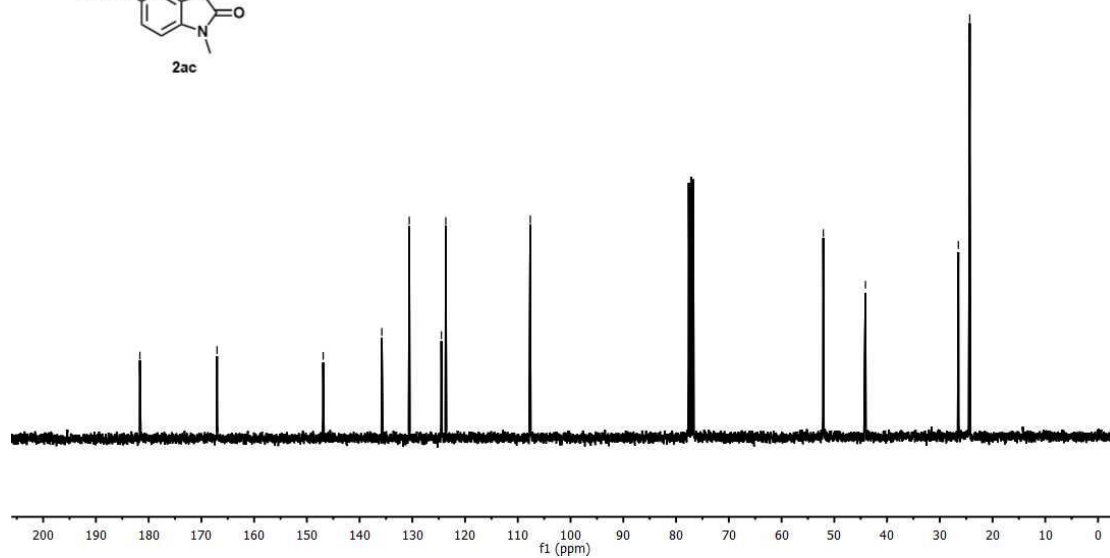

CMW-I-131-2

7.6584  
7.6012  
7.5983  
7.5942  
7.4643  
6.9437  
6.9166  
3.2566  
1.3986

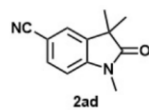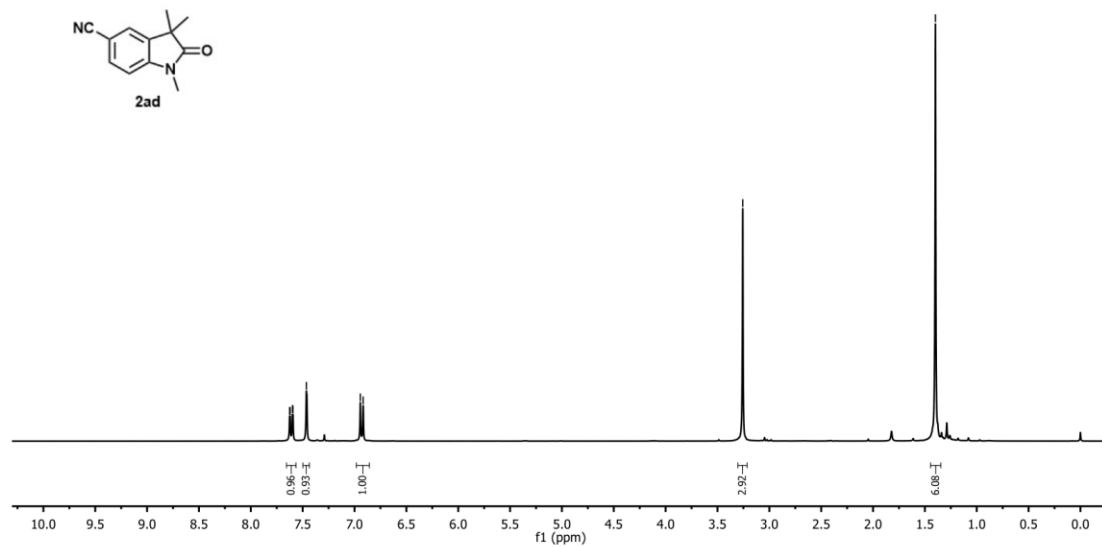

CMW-I-131-2 13C

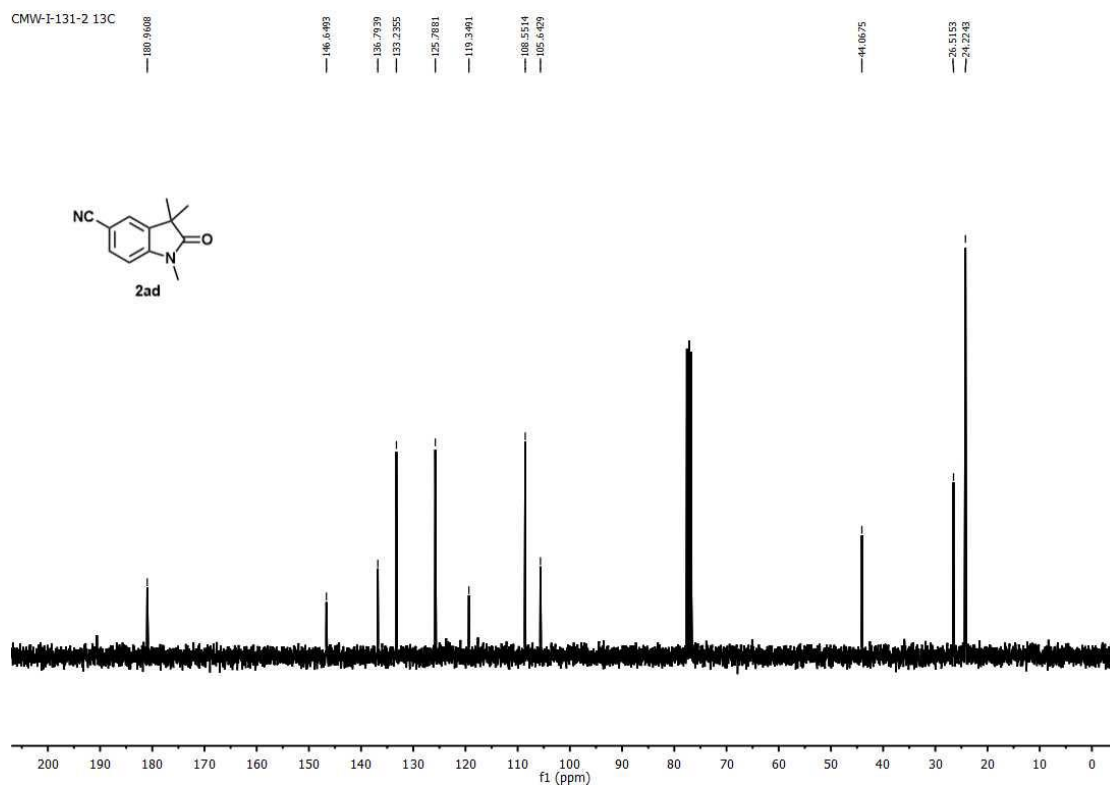

CMW-I-131-1A

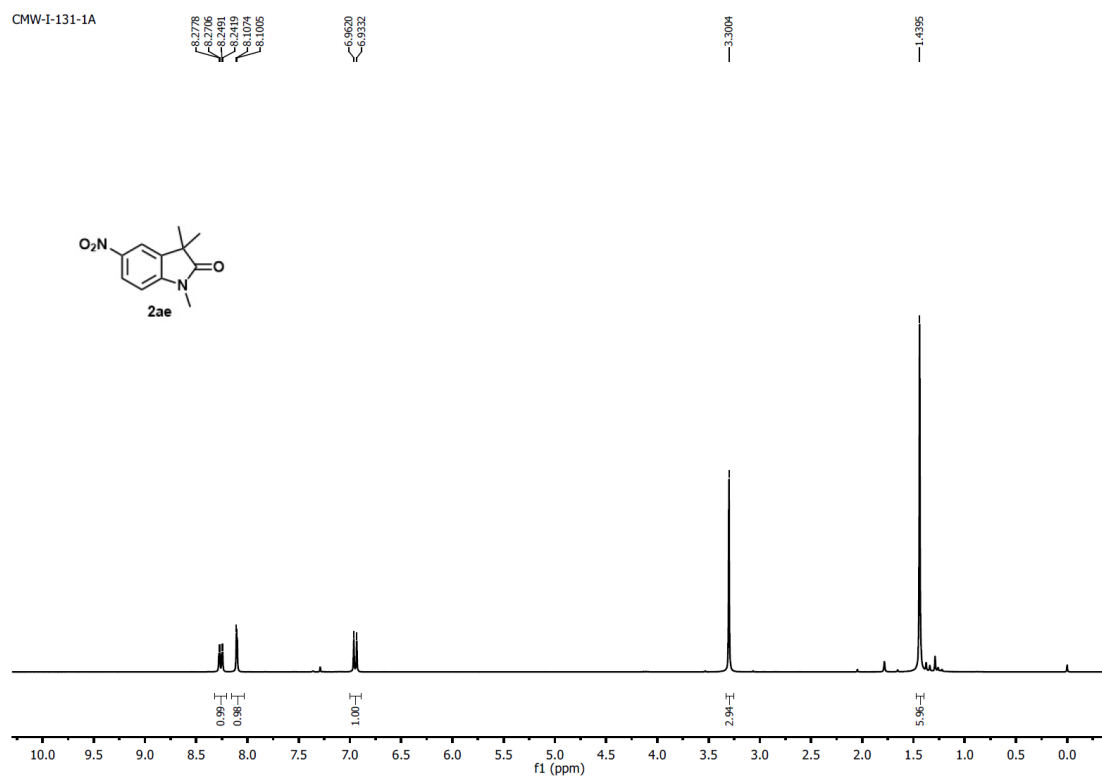

CMW-I-131-1A 13C

181.3451  
148.4836  
143.5597  
136.5590  
125.2564  
118.3746  
107.6901  
44.2903  
26.7239  
24.2388

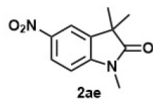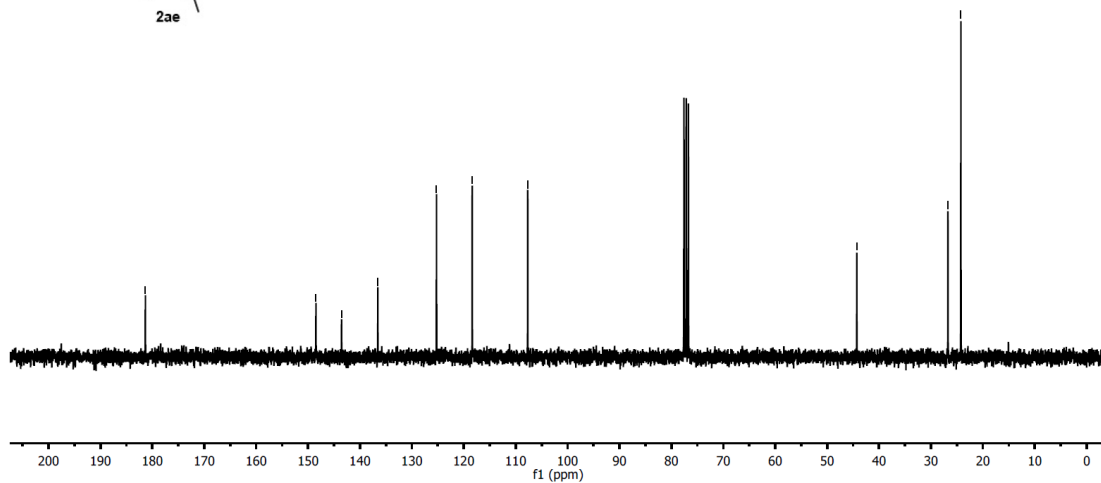

CMW-I-119-8

7.5068  
7.5115  
7.4387  
6.9275  
6.9102  
3.2567  
1.4038

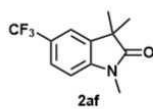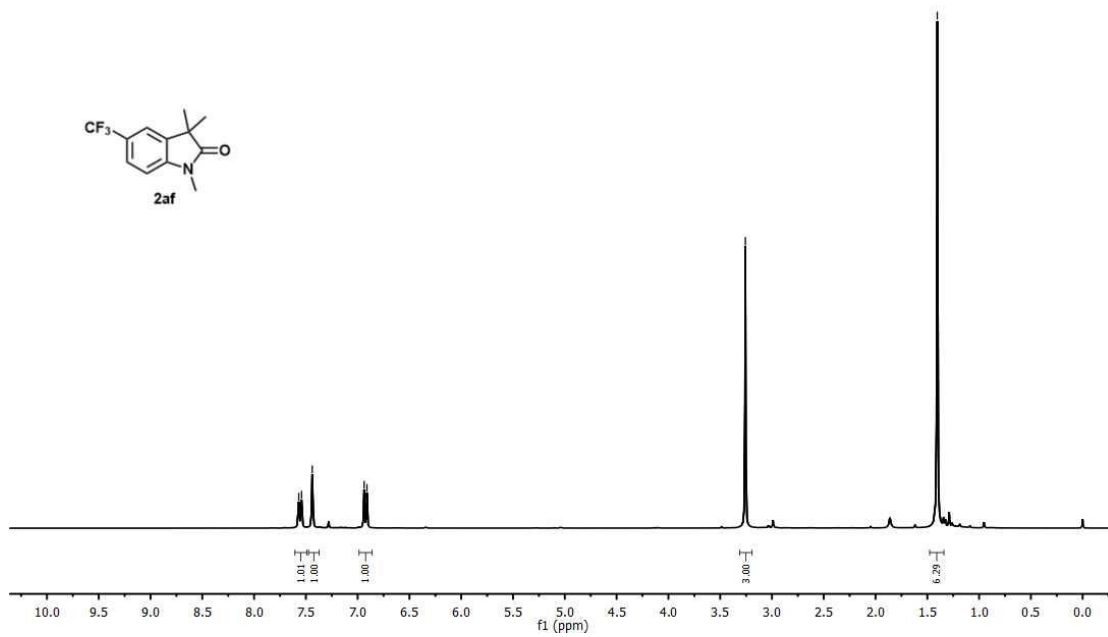



CMW-I-119-8 19F

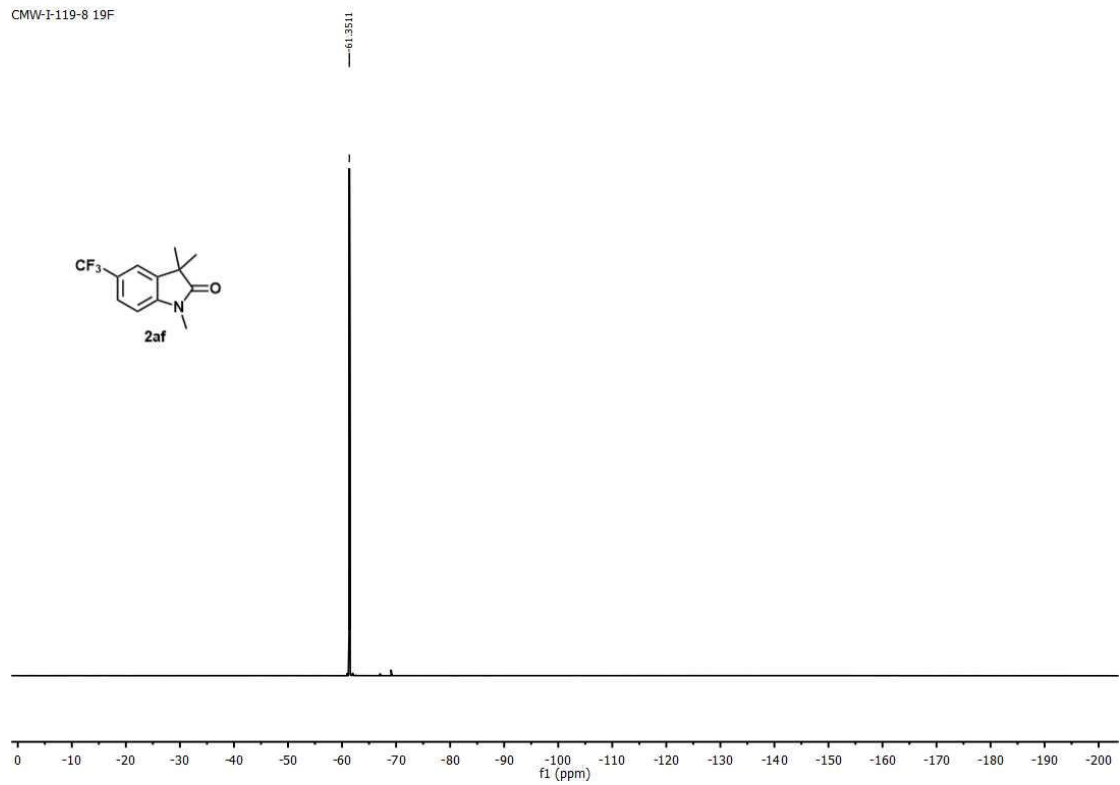

CMW-I-119-8 13C

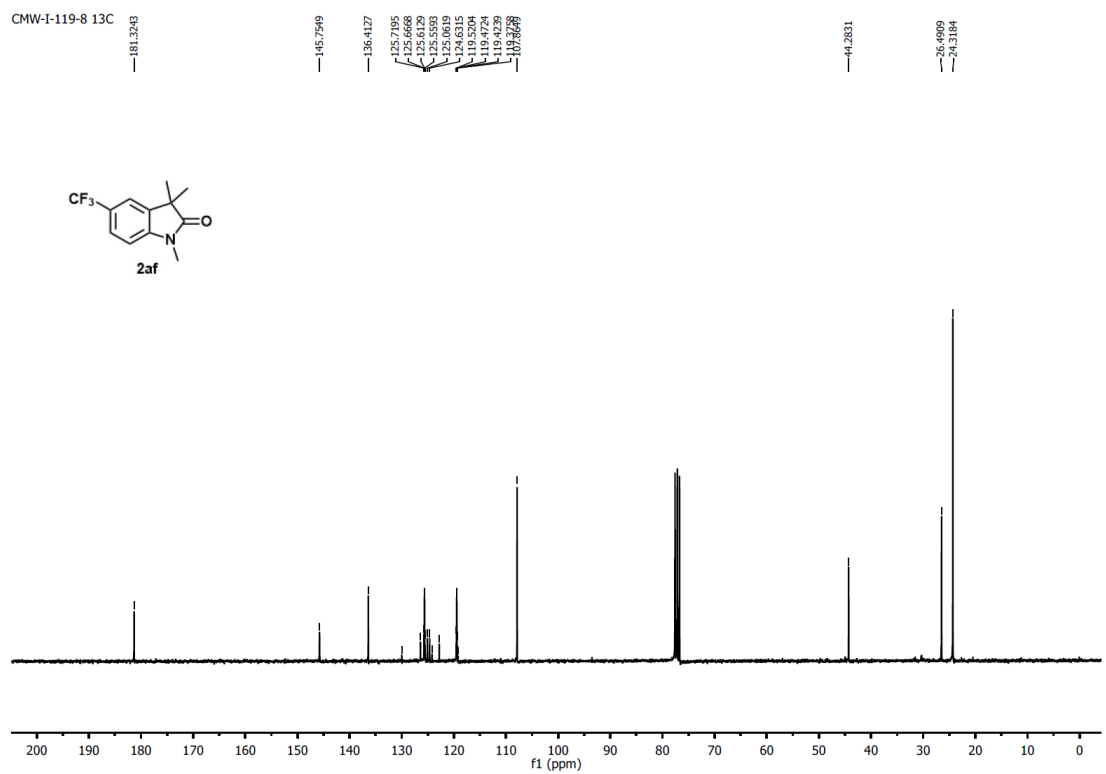

CMW-I-183-3A

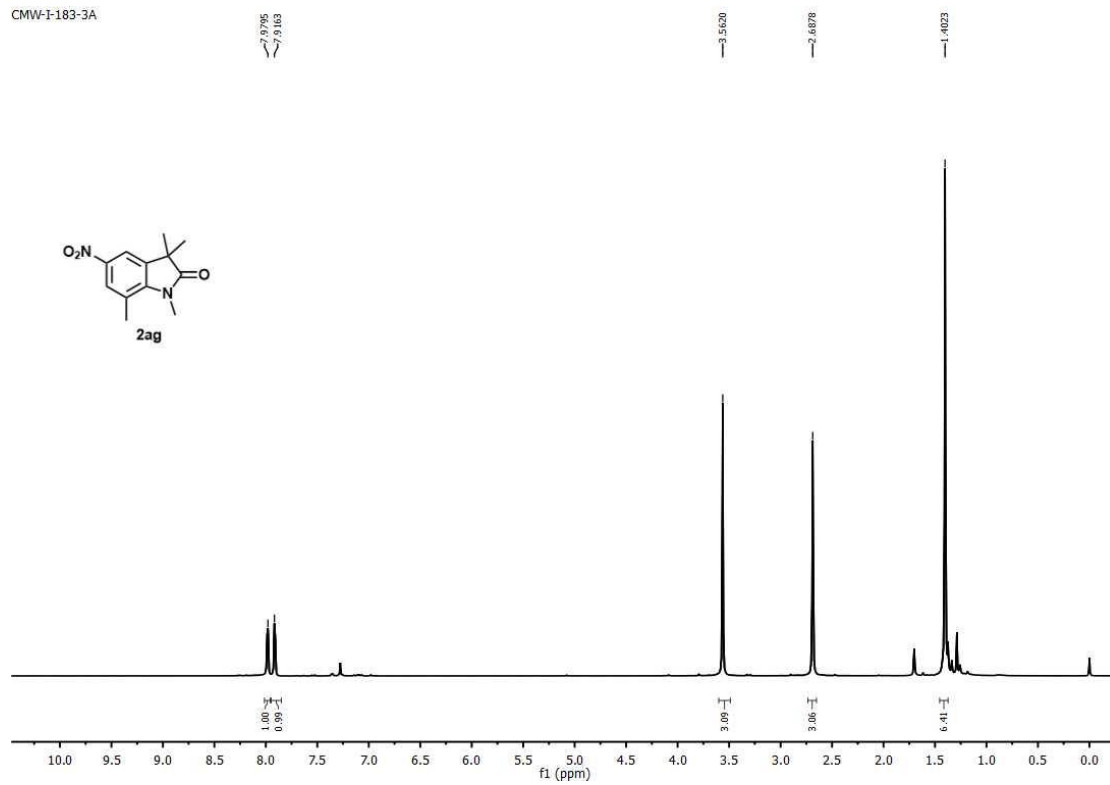

CMW-I-183-3A 13C

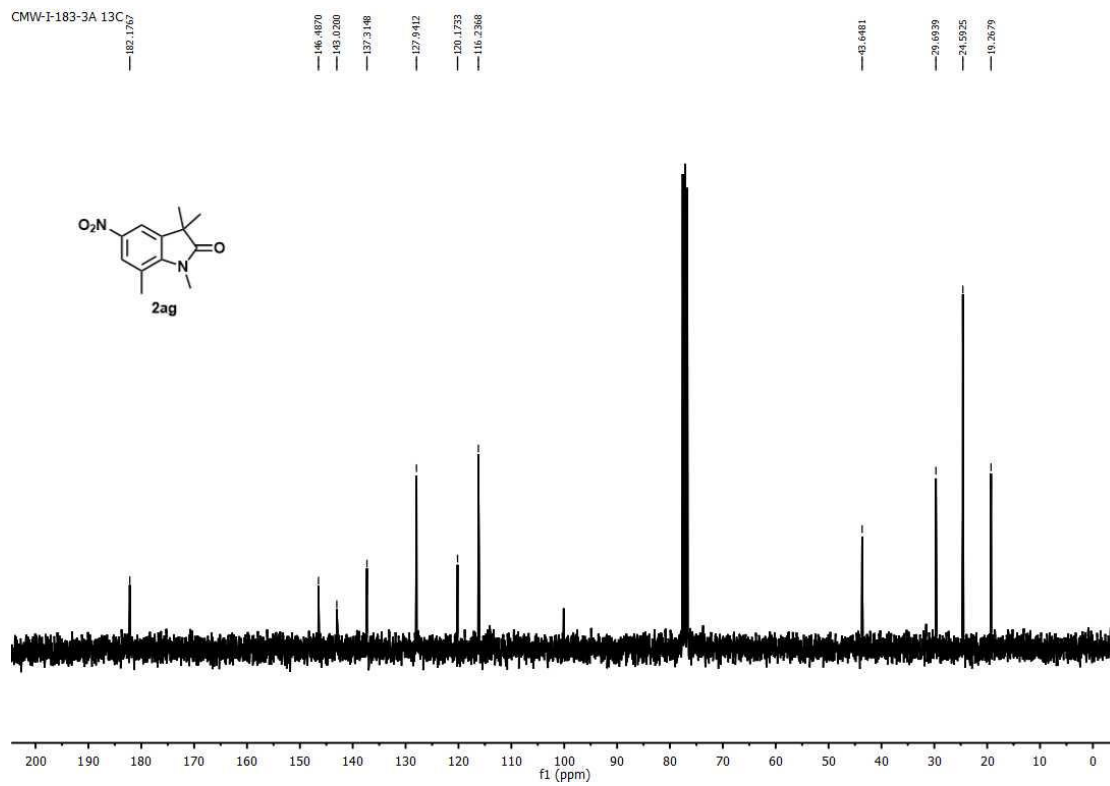

CMW-I-183-4 1H

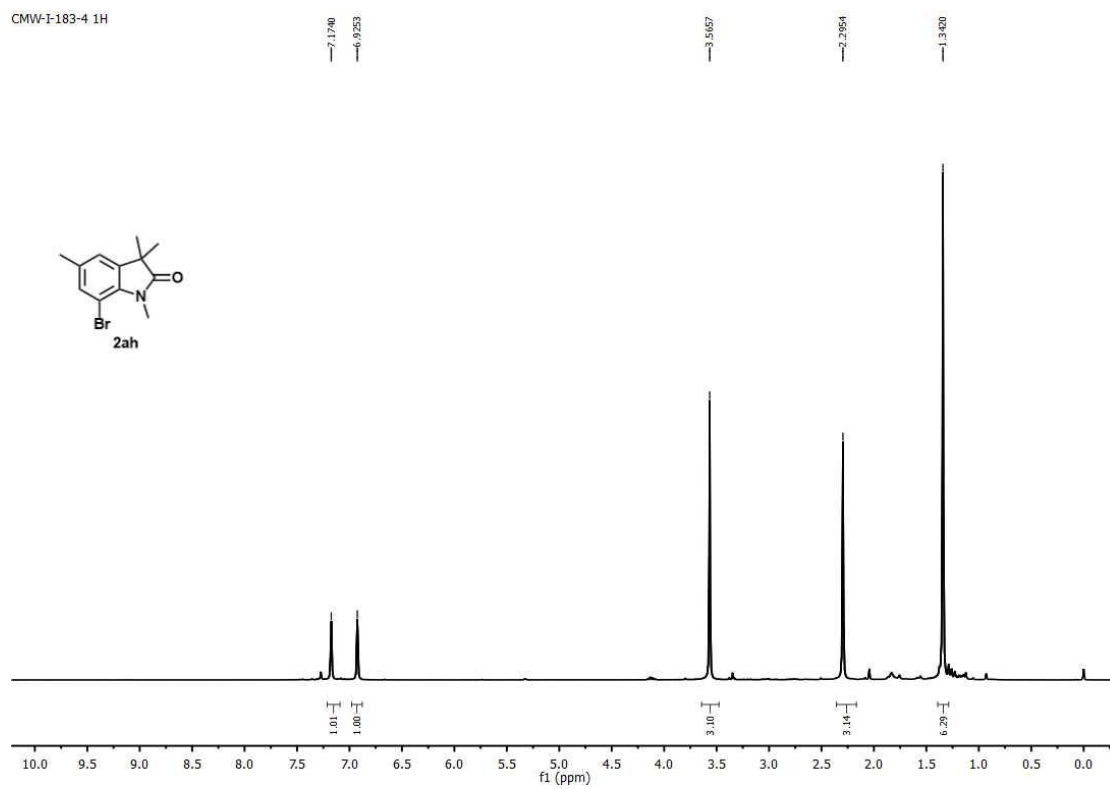

CMW-I-183-4 13C

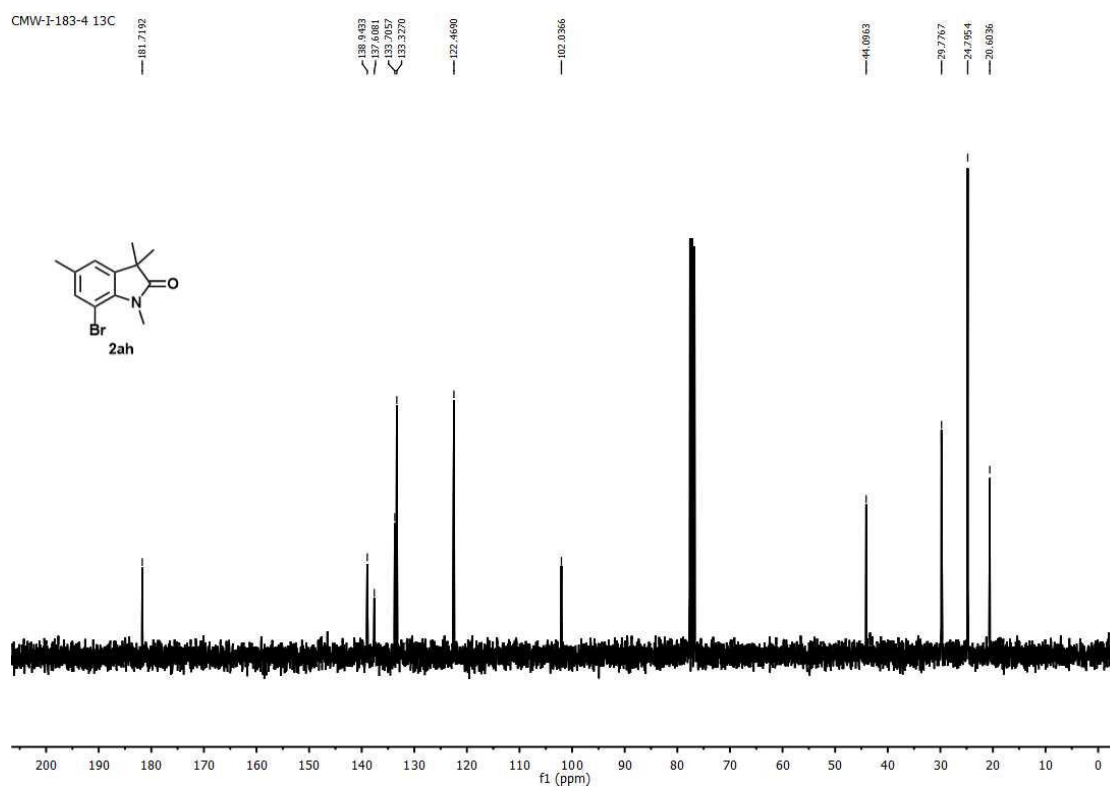

CMW-I-145-2 1H AGAIN

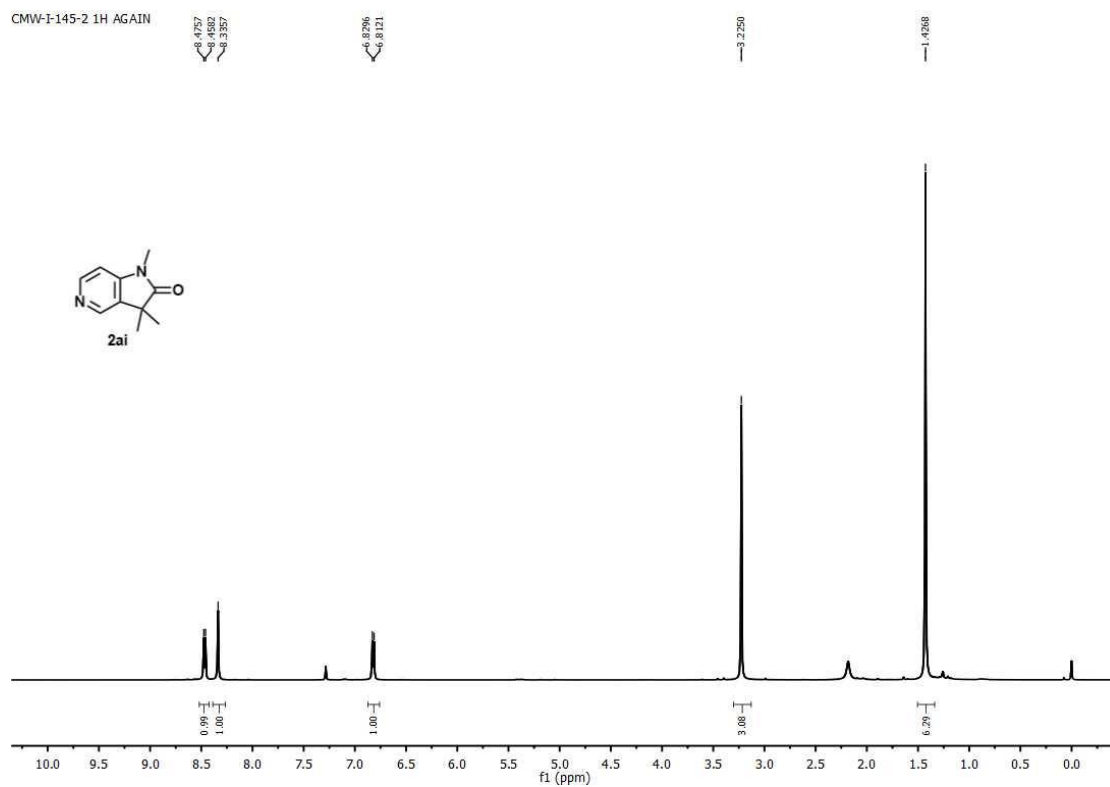

CMW-I-145-2 13C

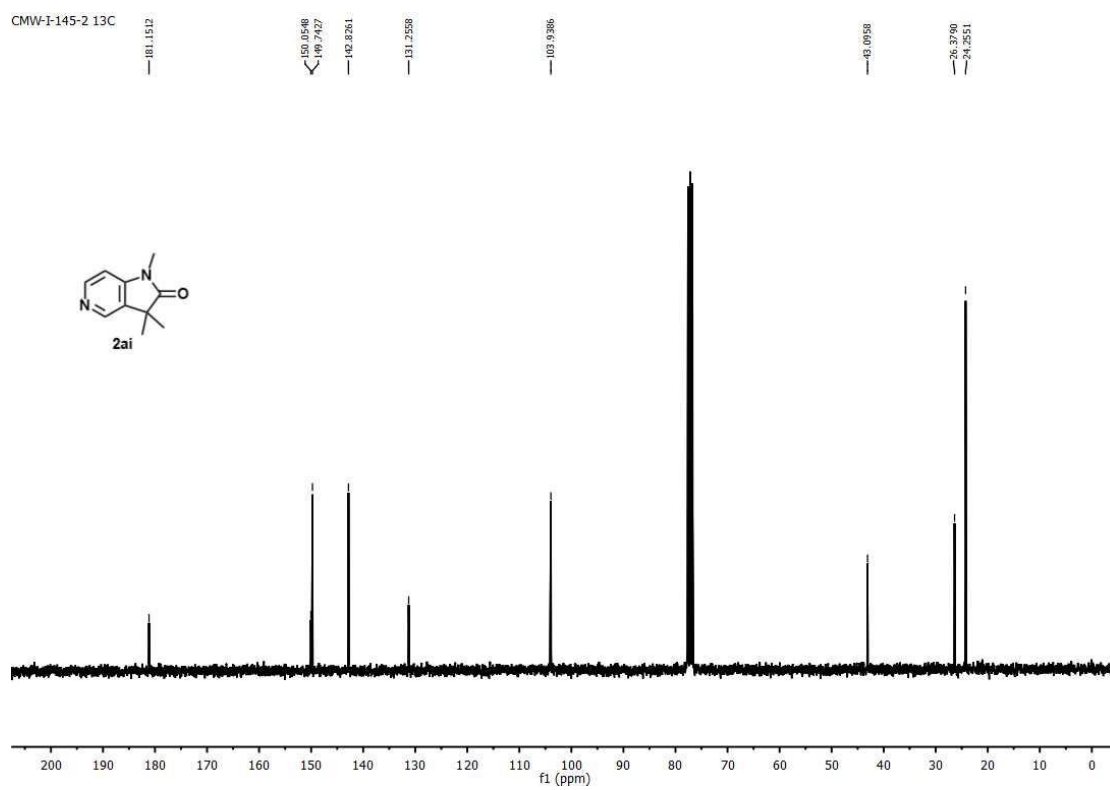

CMW-I-146-4

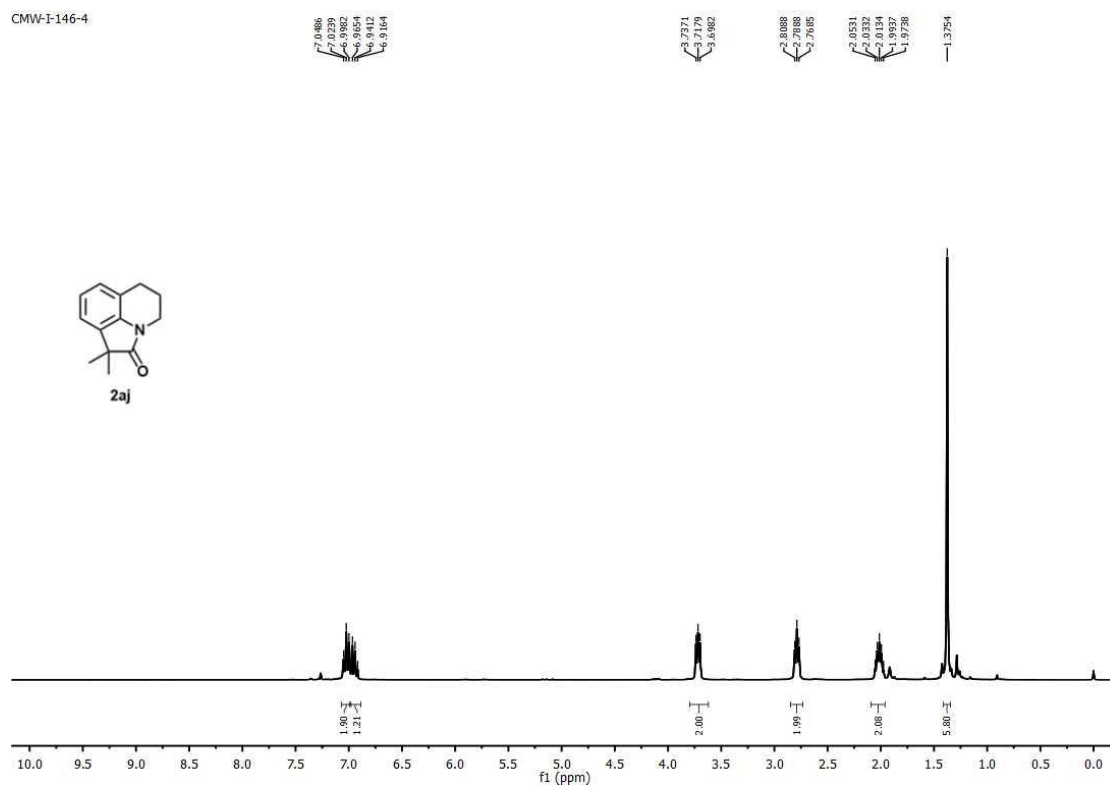

CMW-I-146-4 13C

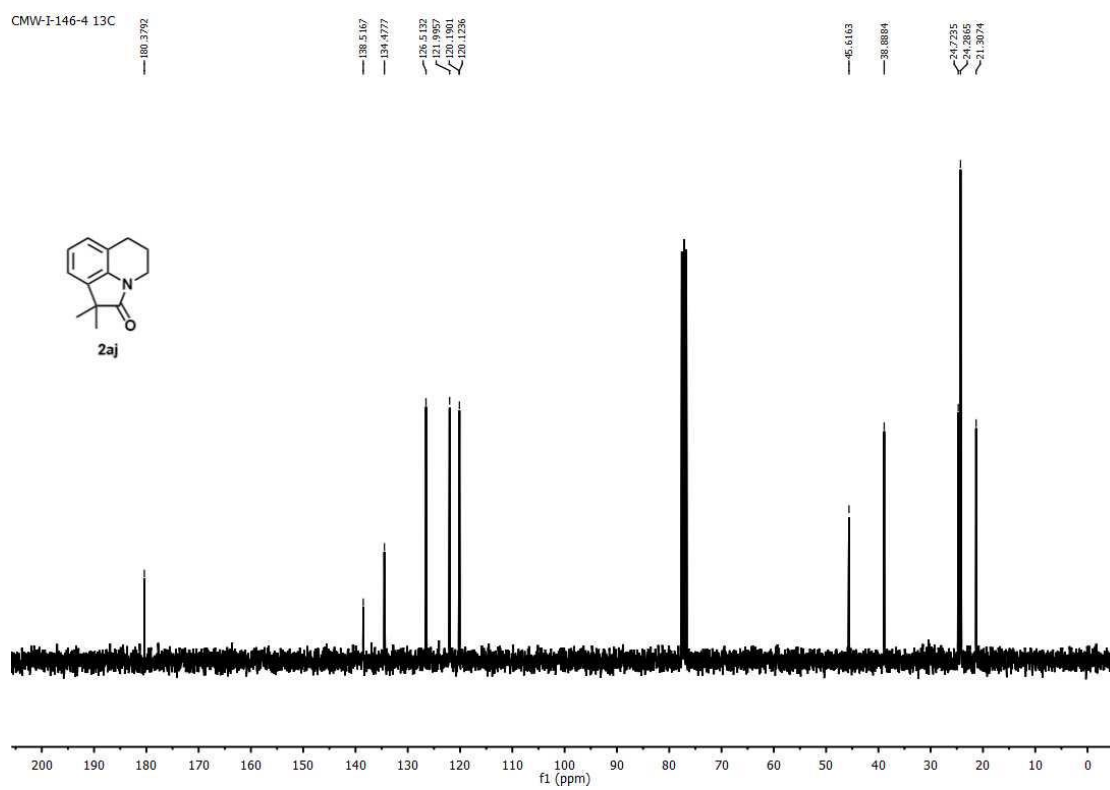

CMW-II-65-A

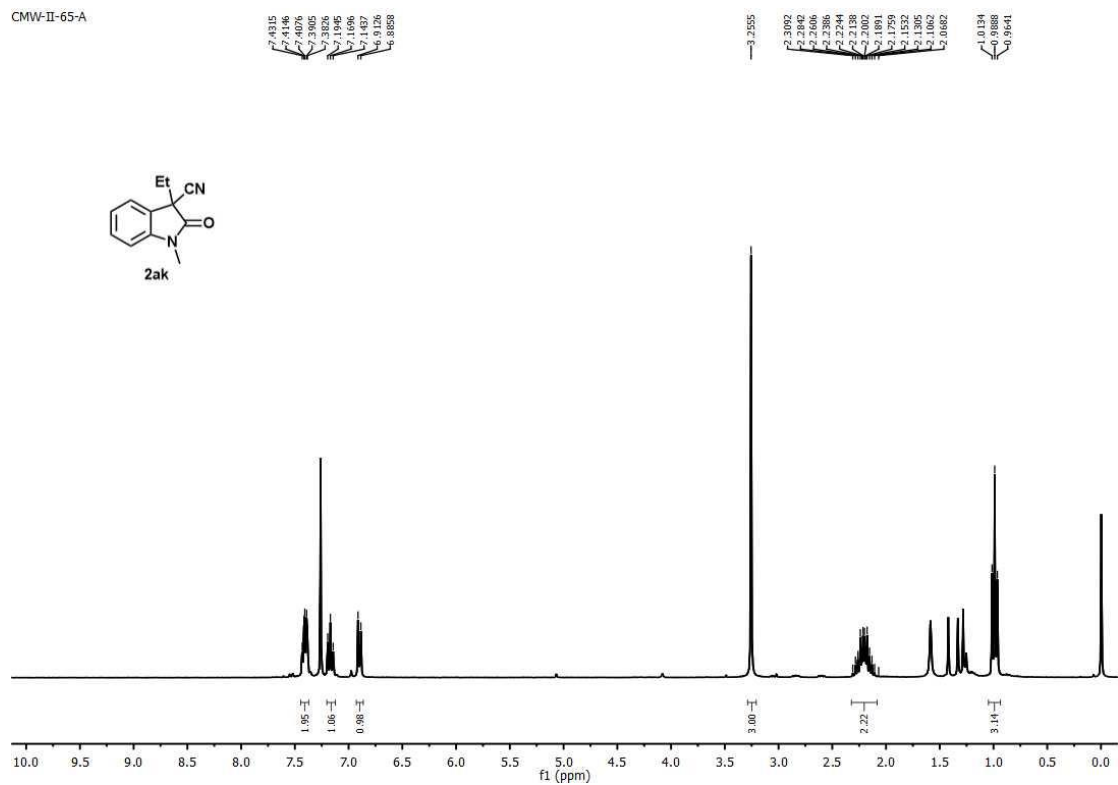

CMW-II-65-A 13C

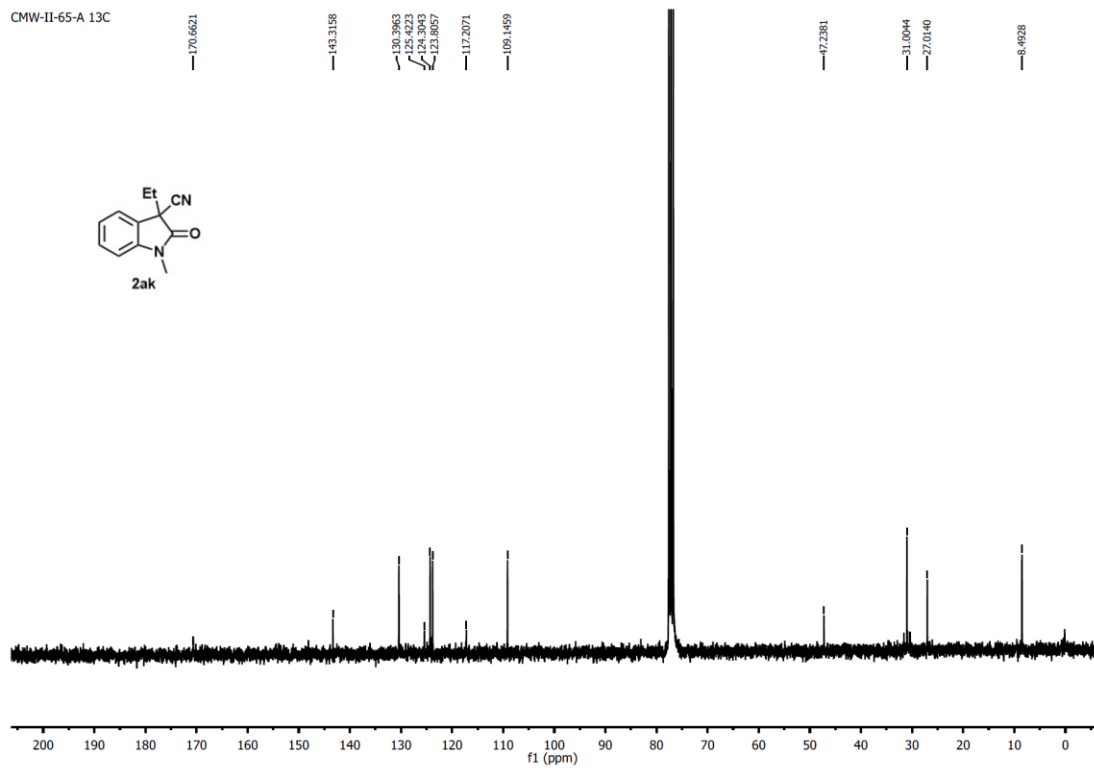

CMW-II-67-B

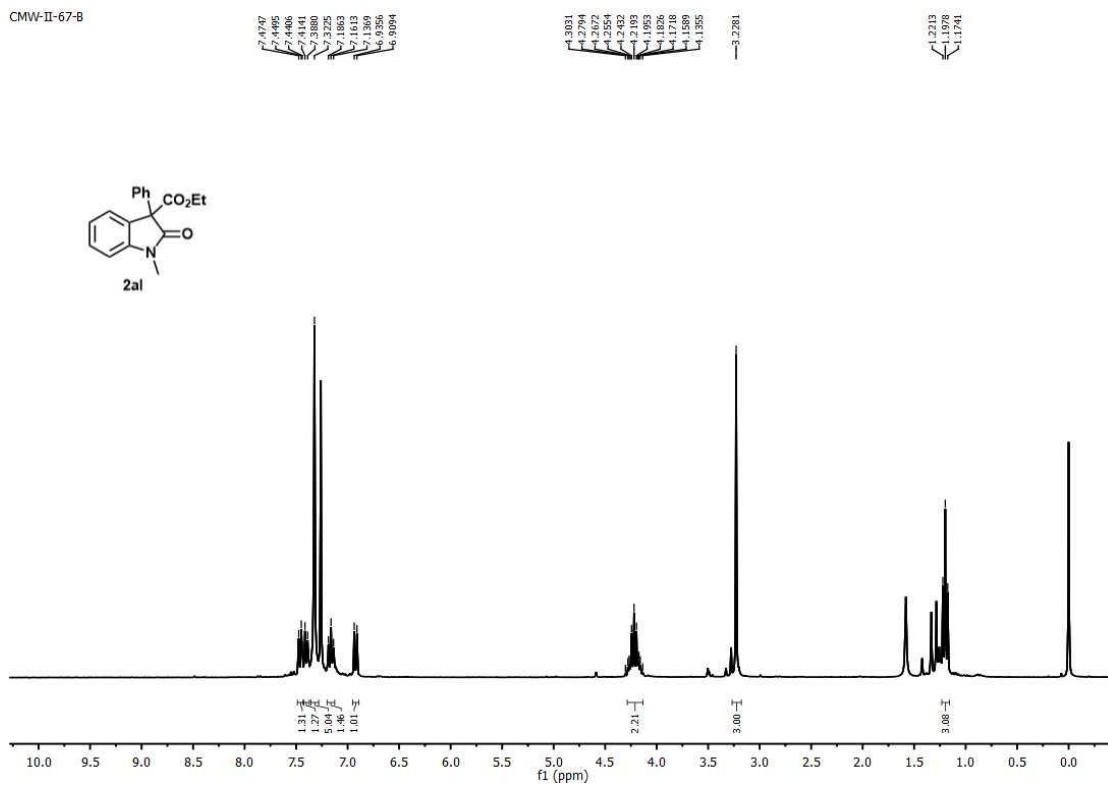

CMW-II-67-B 13C

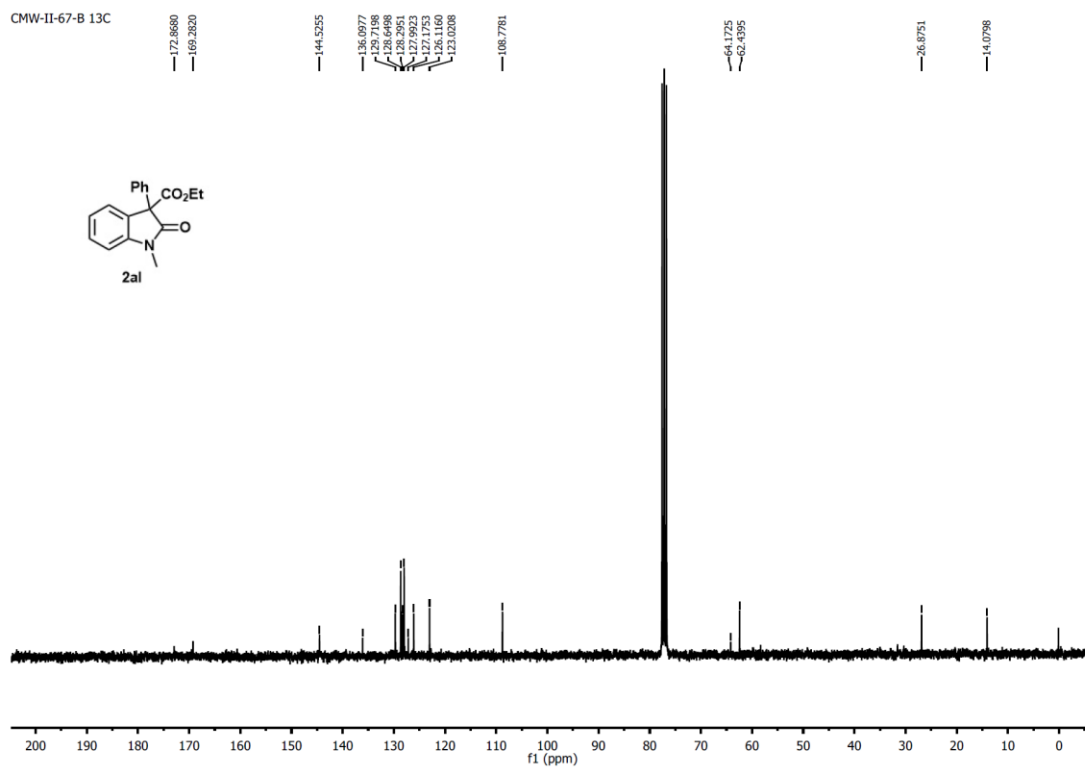

CMW-II-69

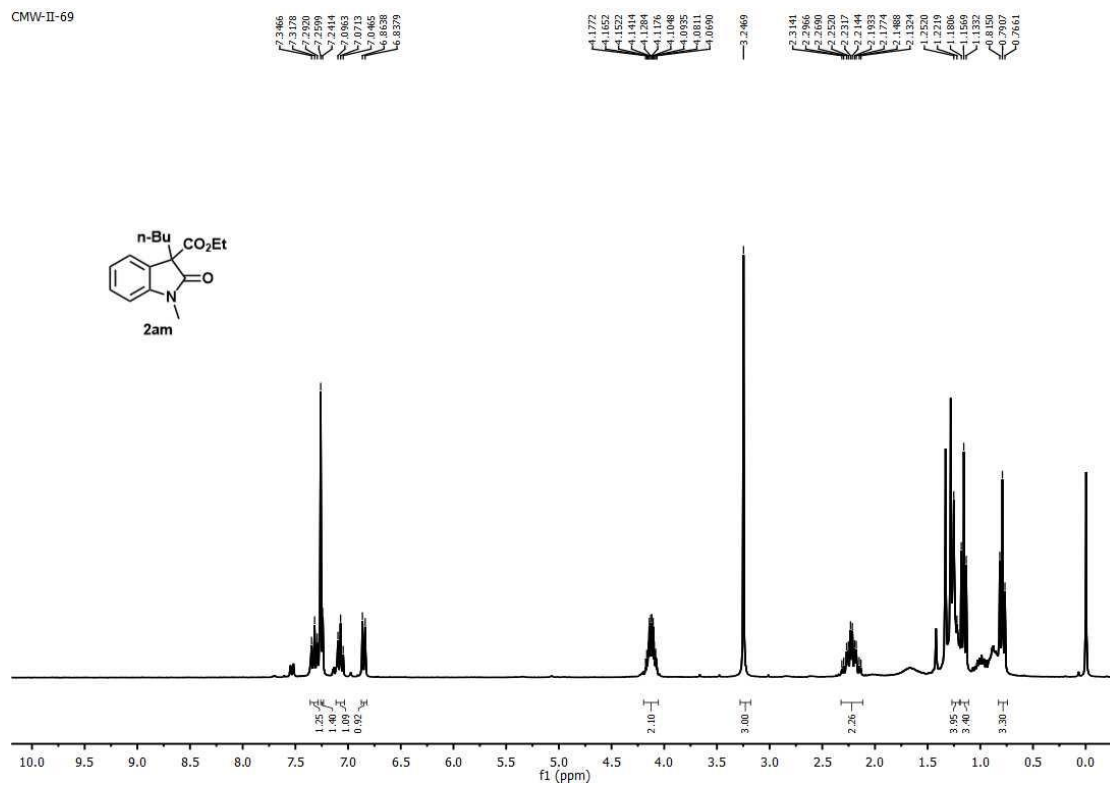

CMW-II-69 13C

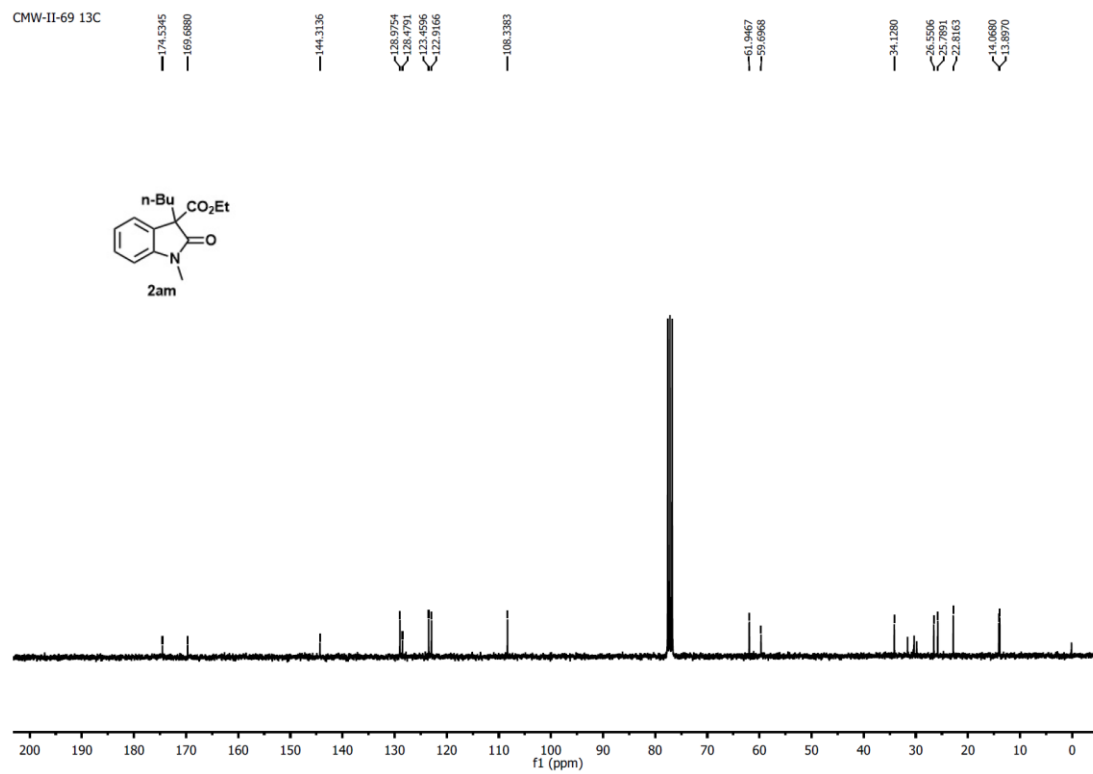



CMW-II-55

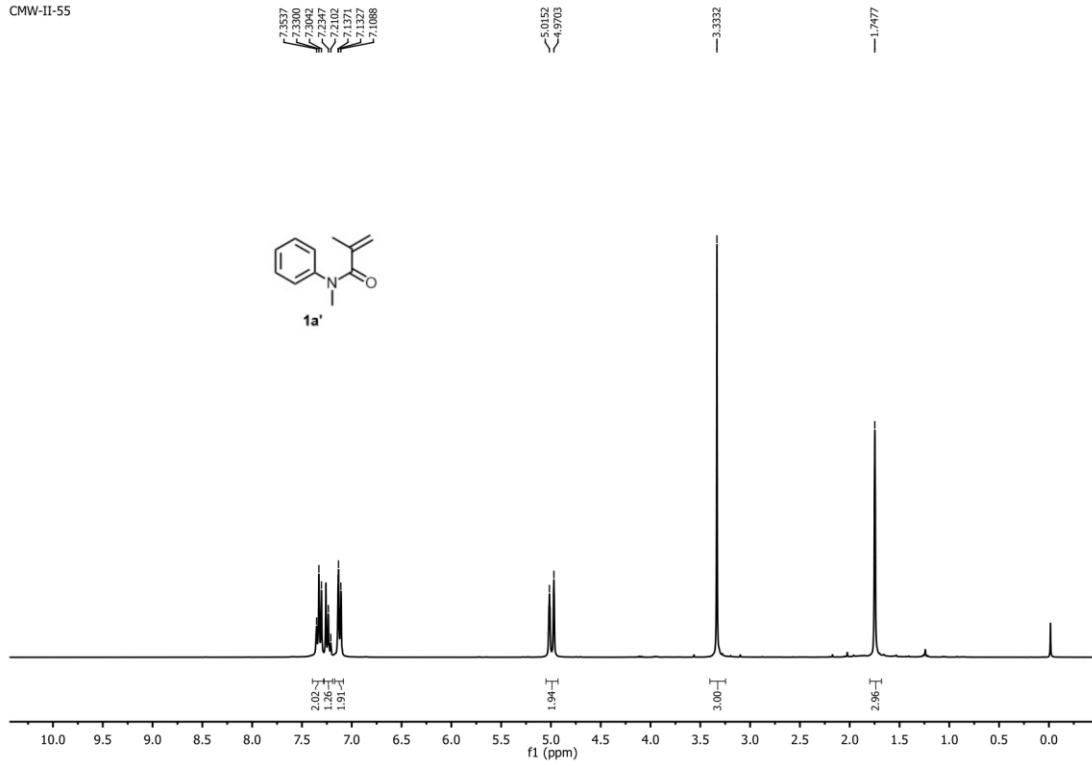

CMW-II-55 13C

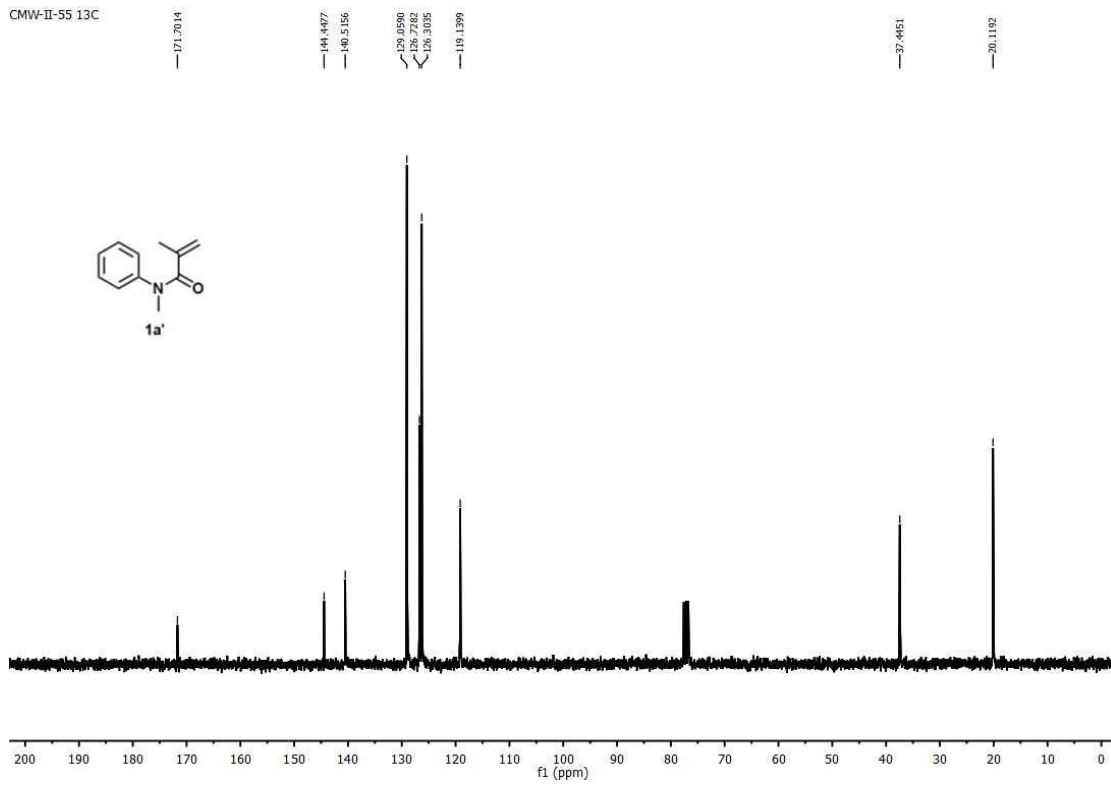

CMW-I-122-6A

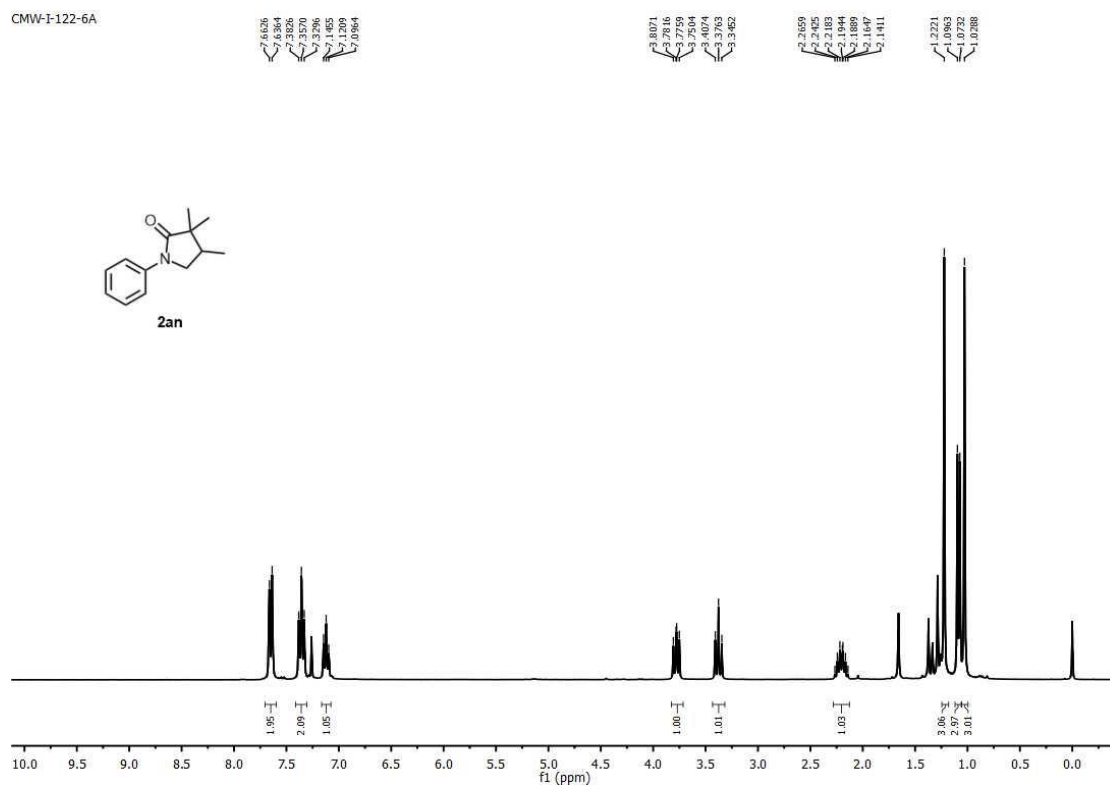

CMW-I-122-6A 13C

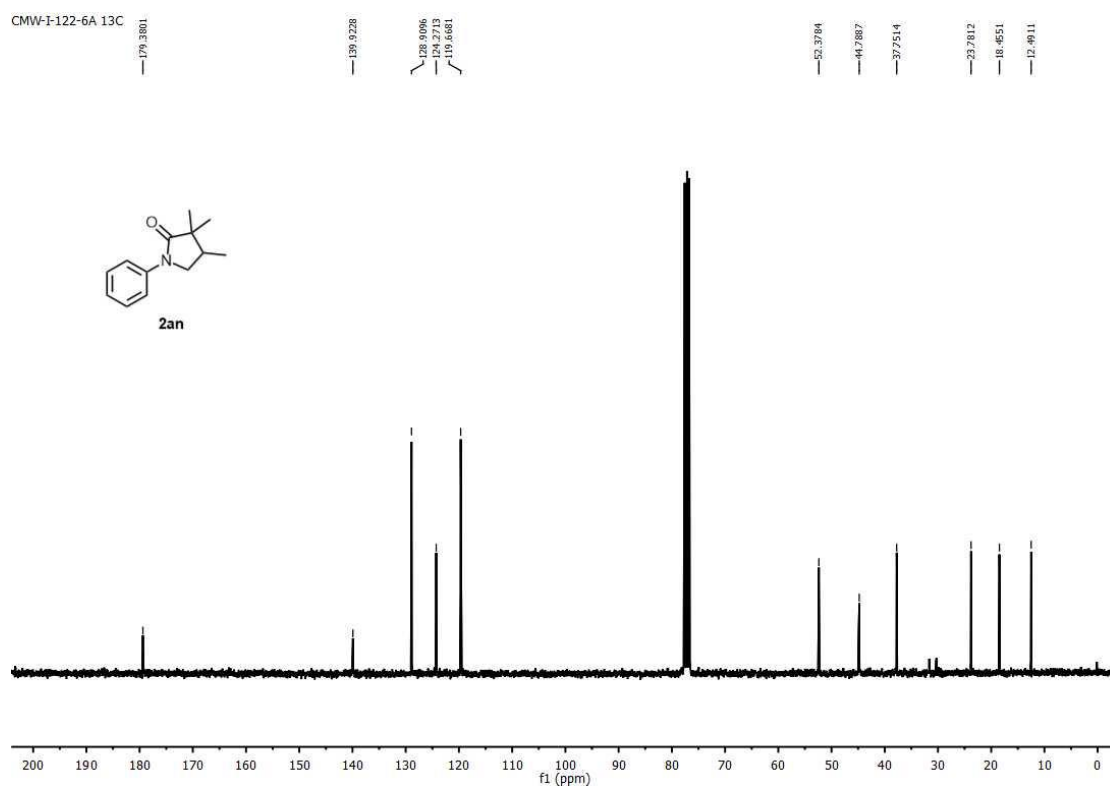

CMW-I-122-6B

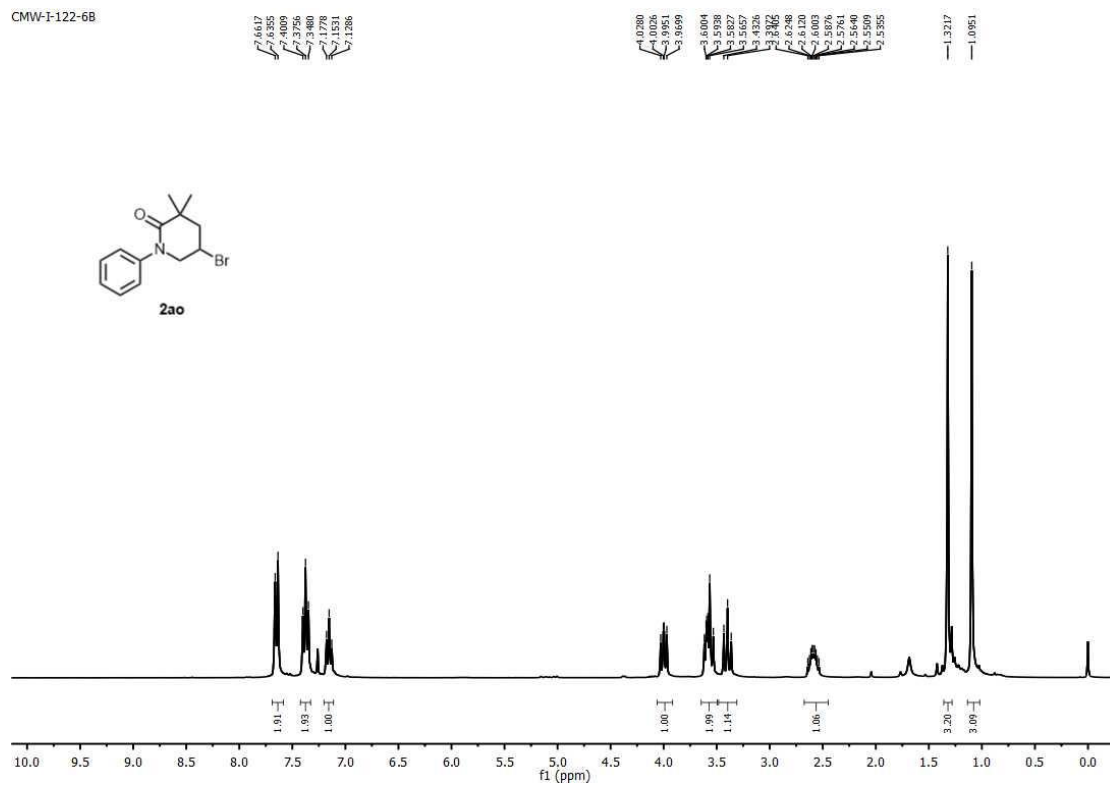

CMW-I-122-6B 13C

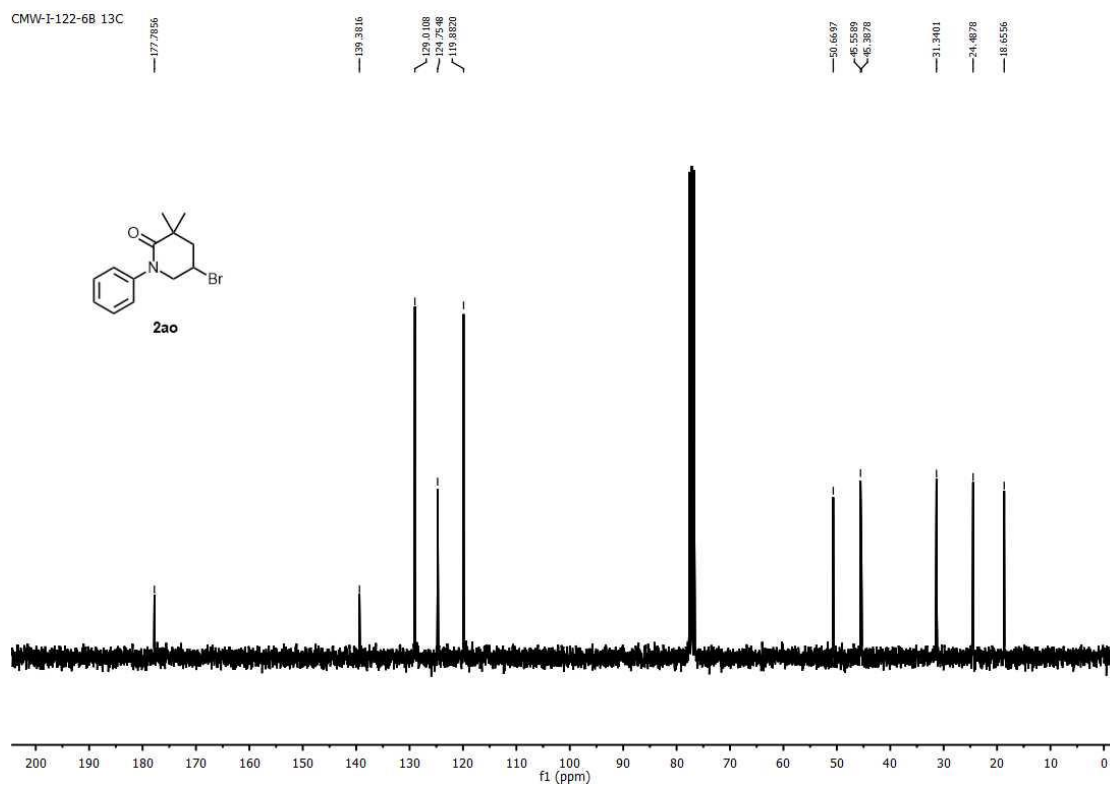

CMW-I-125-2A

7.3664  
7.3469  
7.3272  
7.2787  
7.2568  
7.2226  
7.1946  
7.0916  
7.0233  
6.8203

2.3675

1.6468

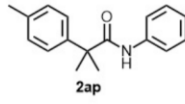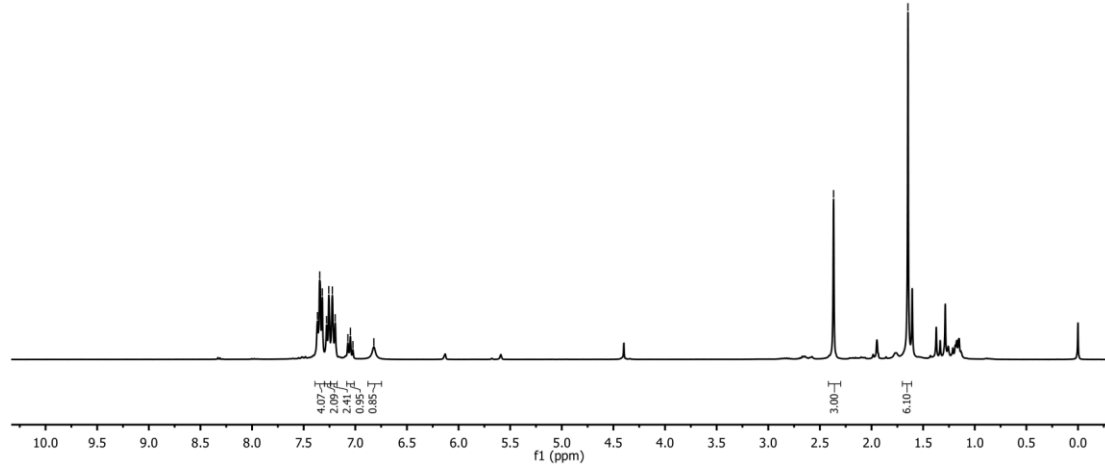

CMW-I-125-2A 13C

175.9568

141.622  
138.1575  
137.2388  
128.8228  
128.9123  
126.5131  
124.2022  
119.7280

47.8515

27.2024

21.1187

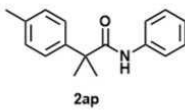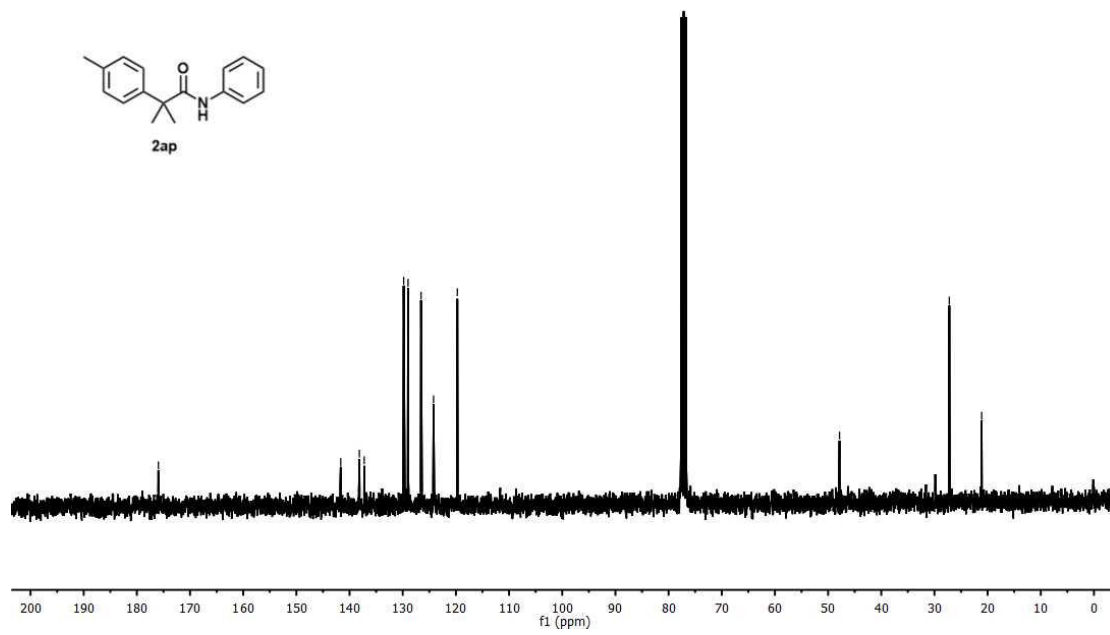

CMW-I-125-2B

7.7036  
7.6792  
7.3696  
7.2546  
7.2387  
7.2182  
7.1885  
7.1042  
7.0782  
7.0511

2.3322

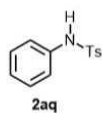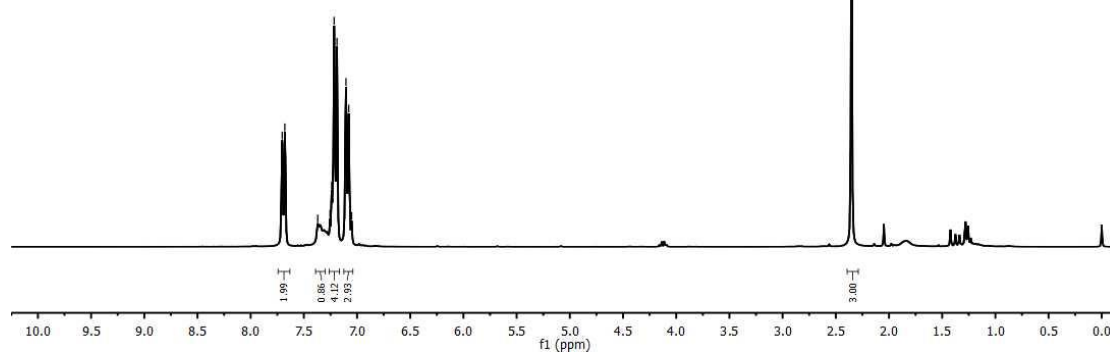

CMW-I-125-2B 13C

153.9776  
136.7546  
136.1076  
129.7594  
129.3799  
127.3904  
121.5186

21.6307

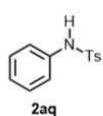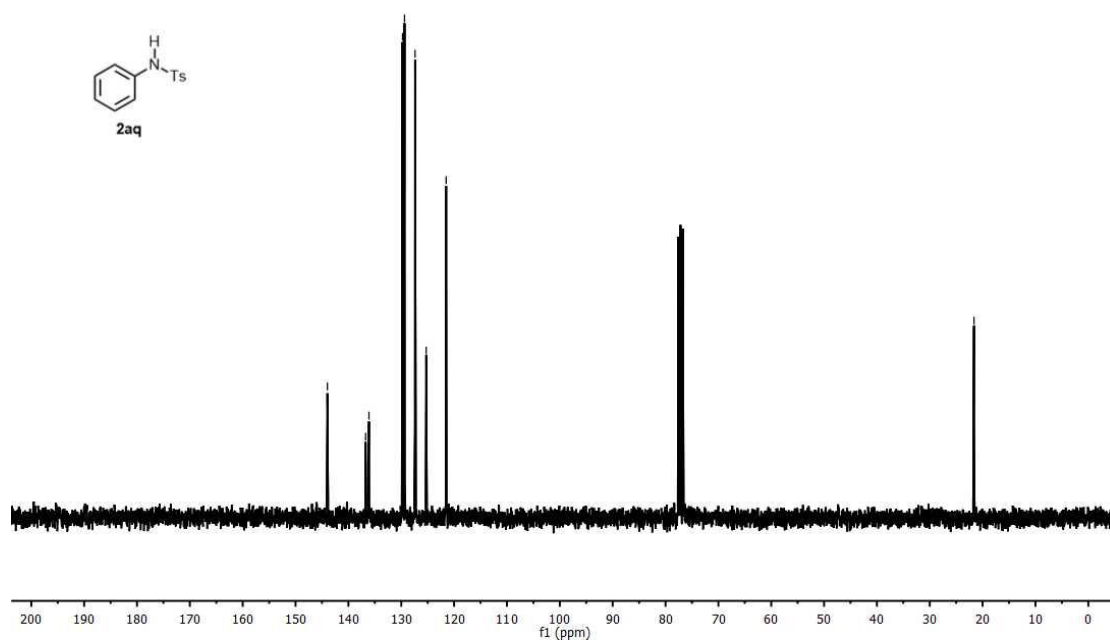

CMW-II-3

—9.7137

7.2683  
7.1837  
7.1646  
7.0471  
7.0226  
6.9921  
6.9521

—1.4094

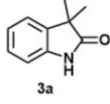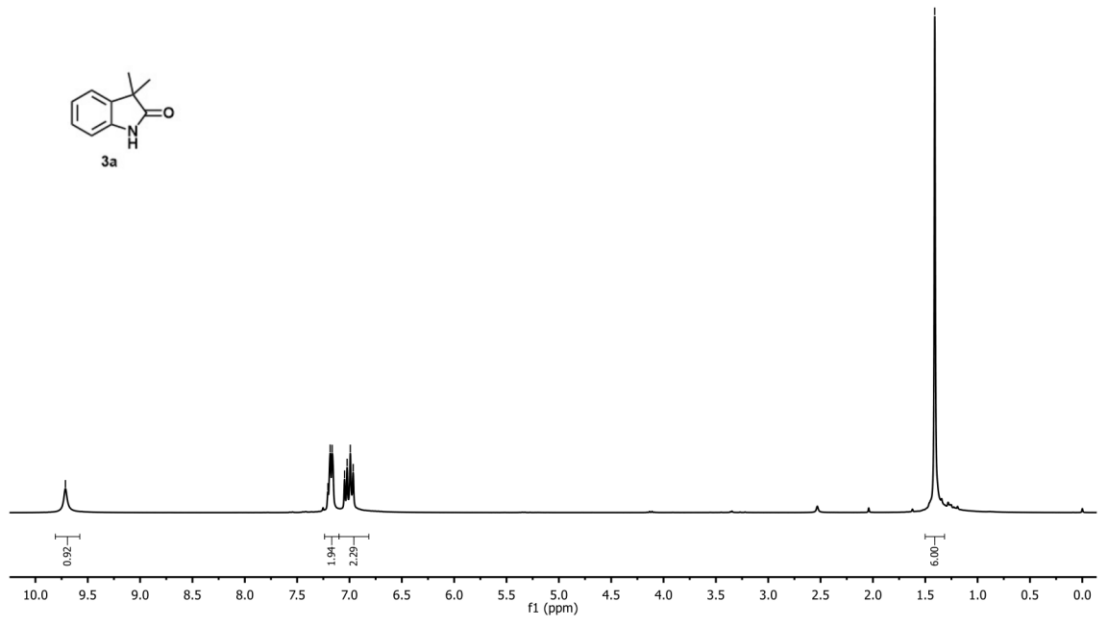

CMW-II-3 13C AGA

—184.3837

—140.2010  
—136.3033

—127.1180  
—122.5597  
—122.4593

—110.2363

—44.8896

—24.3576

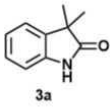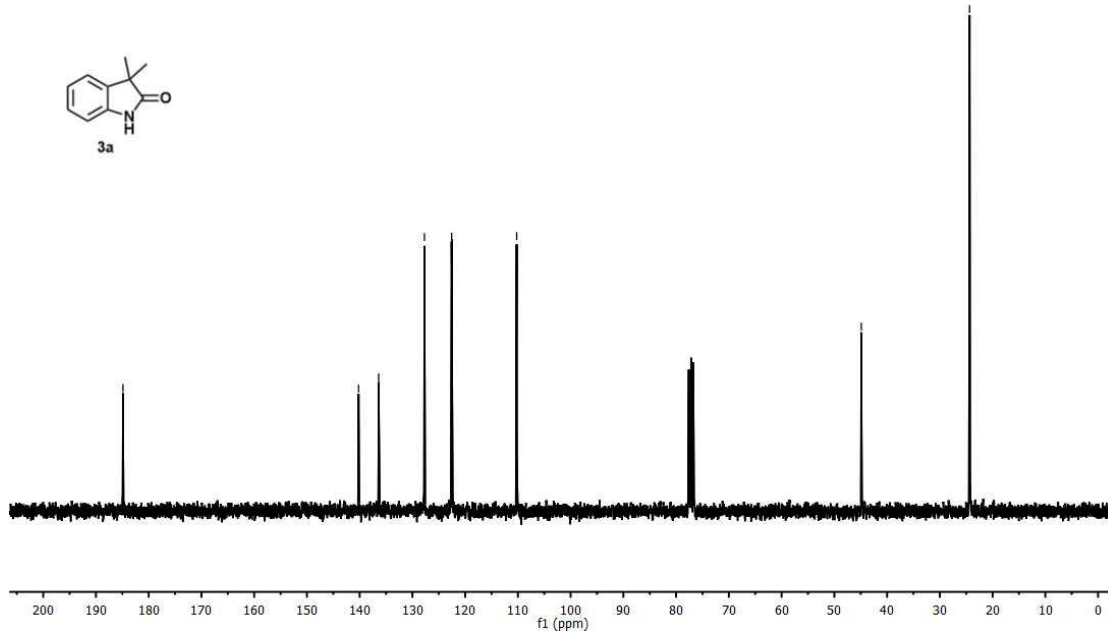

CMW-II-18

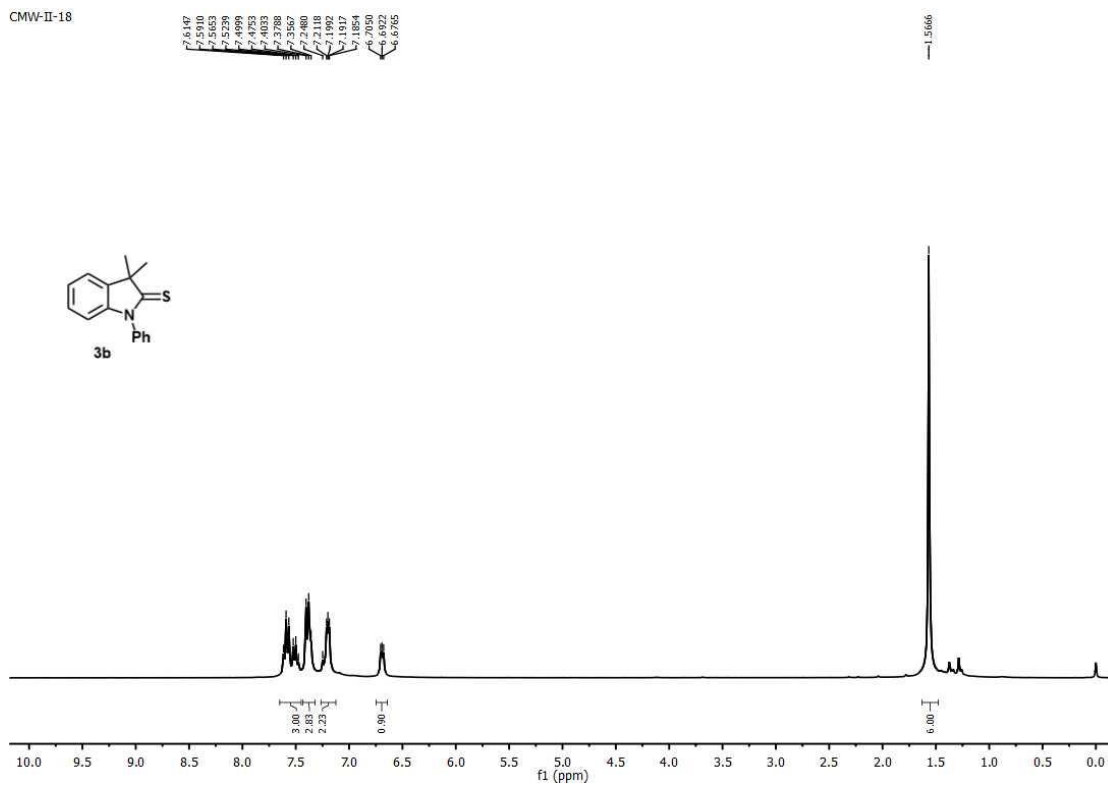

CMW-II-18 13C

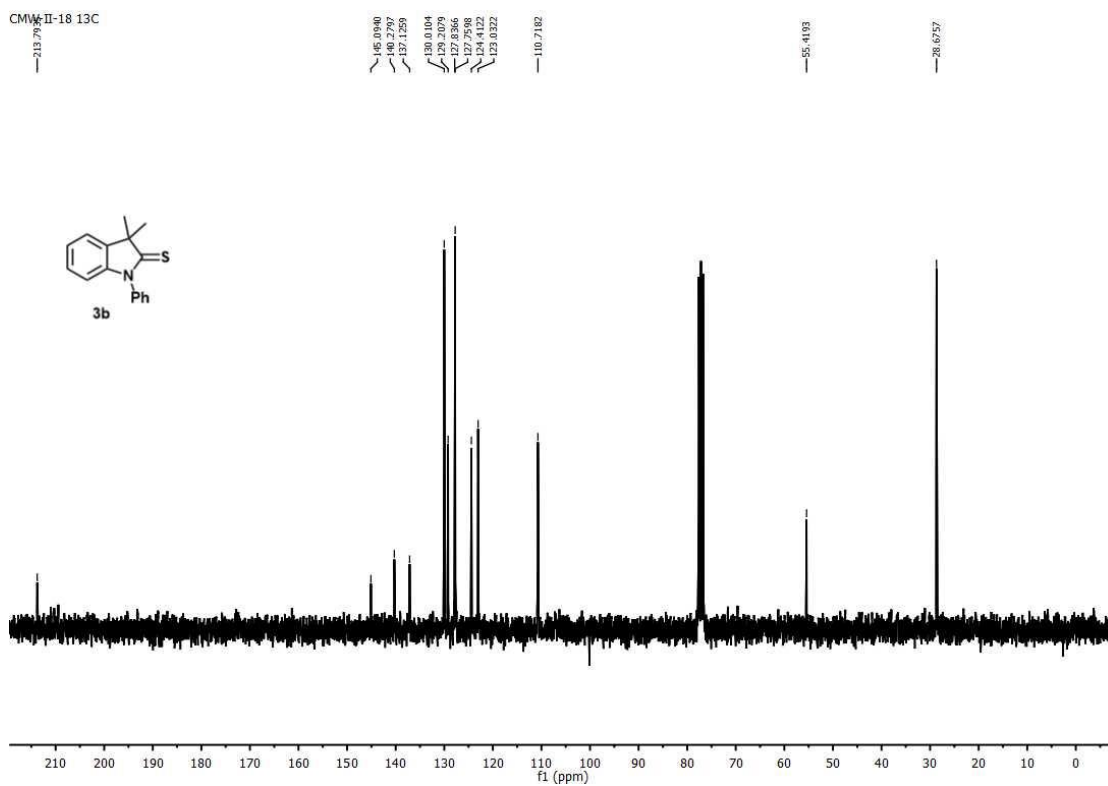

CMW-II-32A

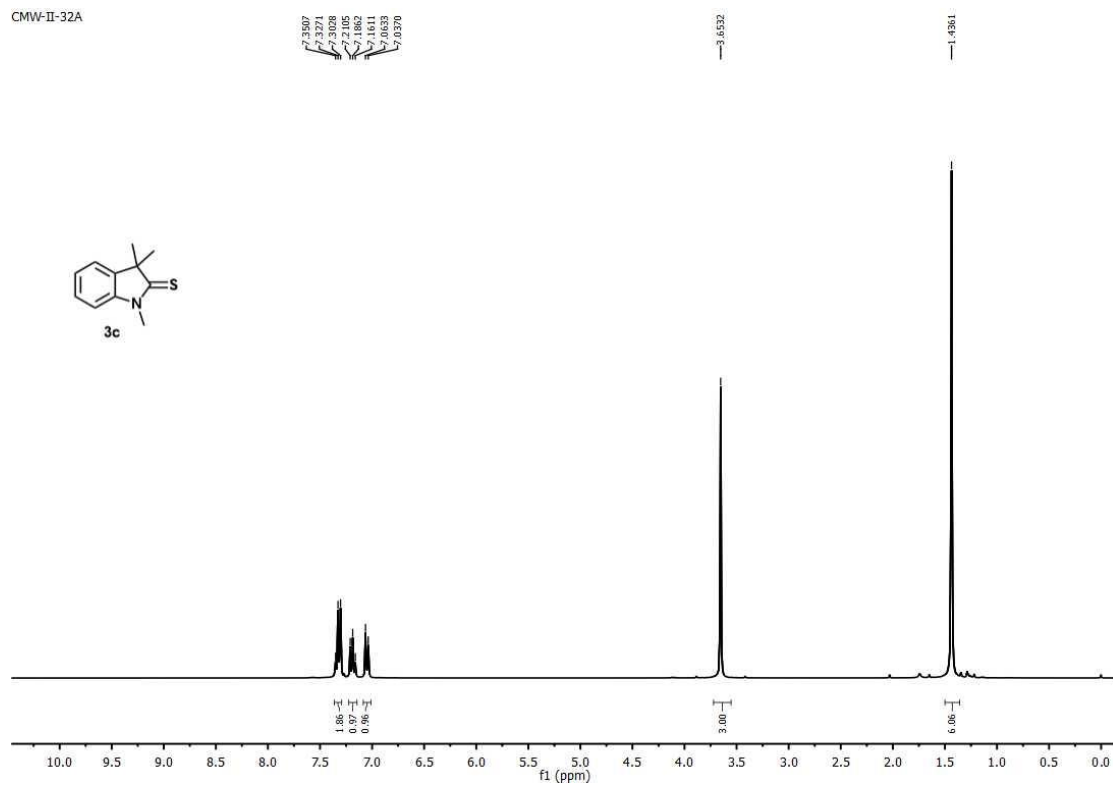

CMW-II-32A 13

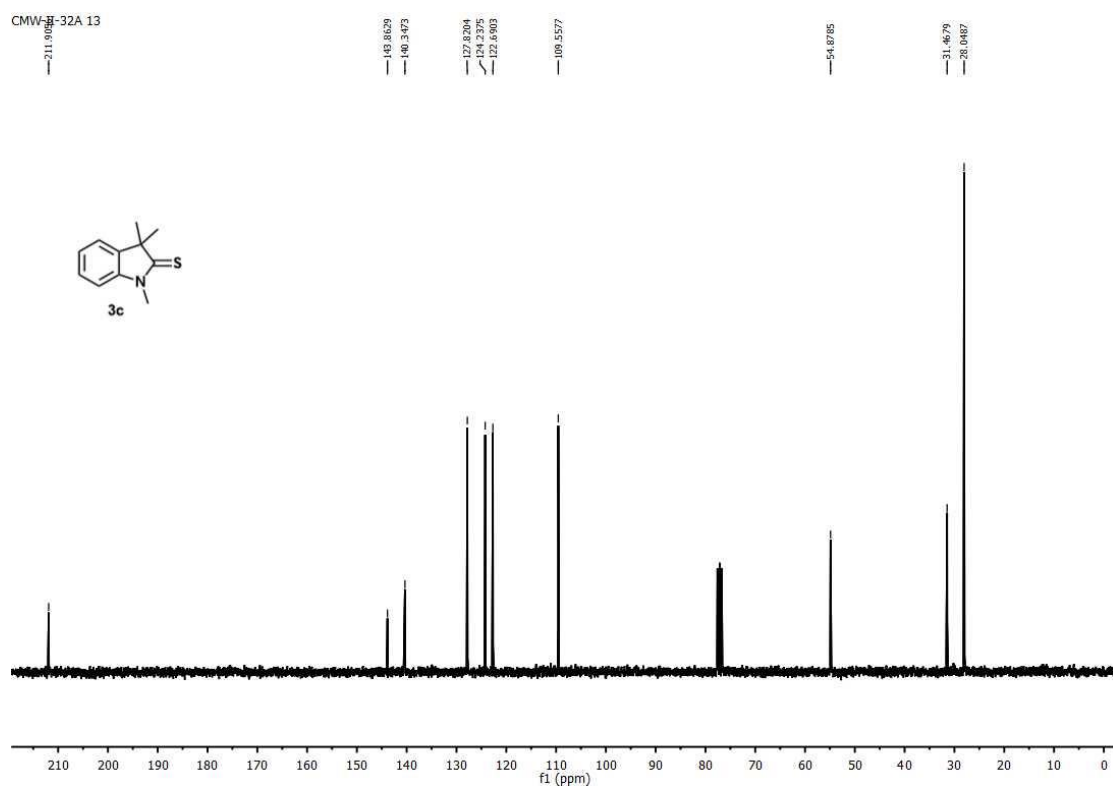



CMW-II-2 AGAIN-2

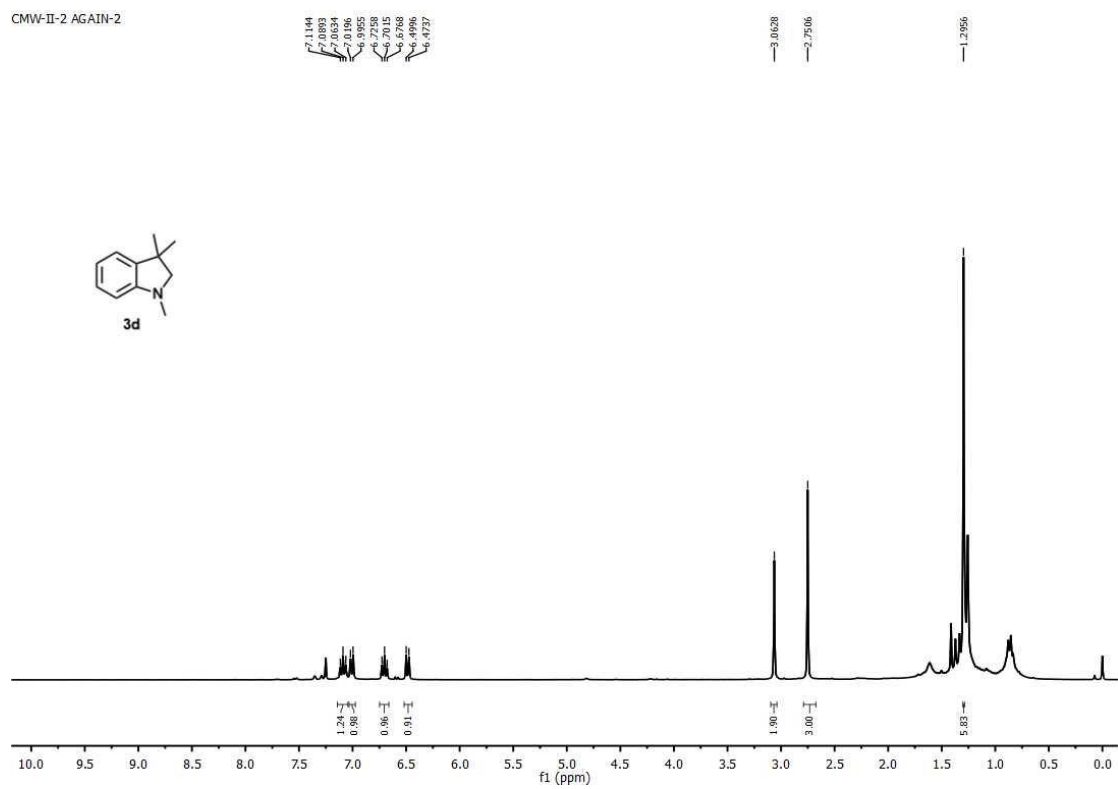

LX-I-84-C

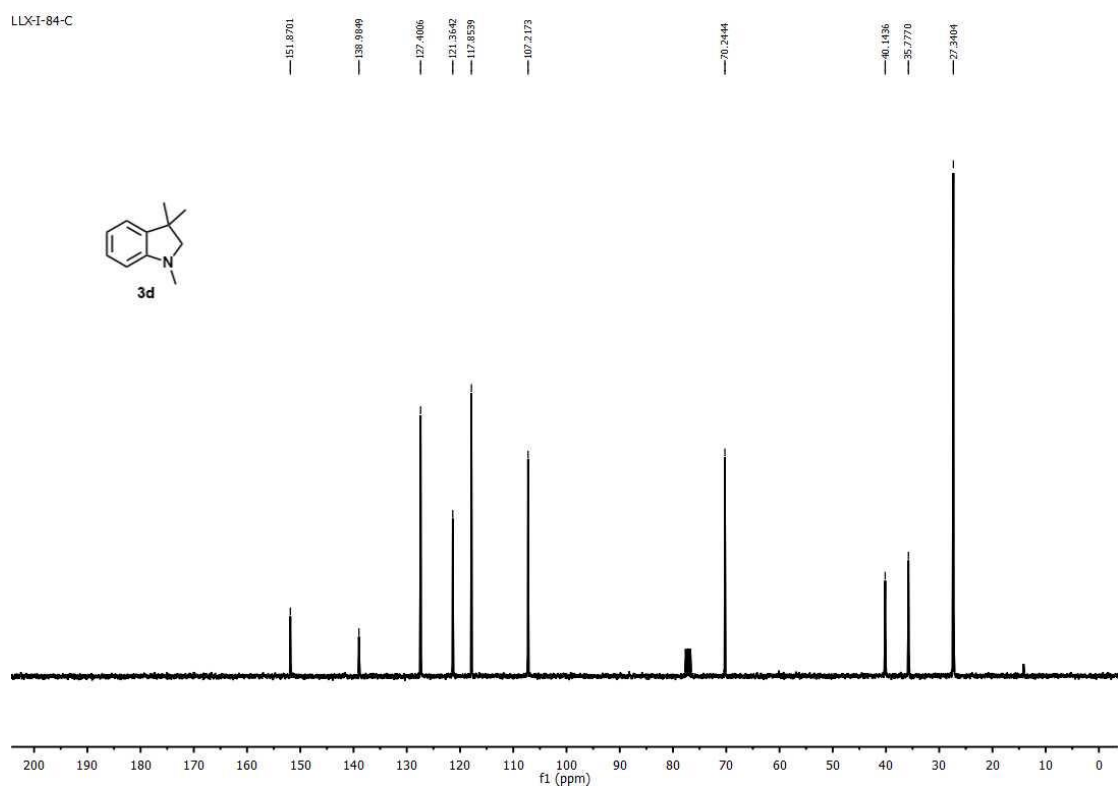

CMW-II-21

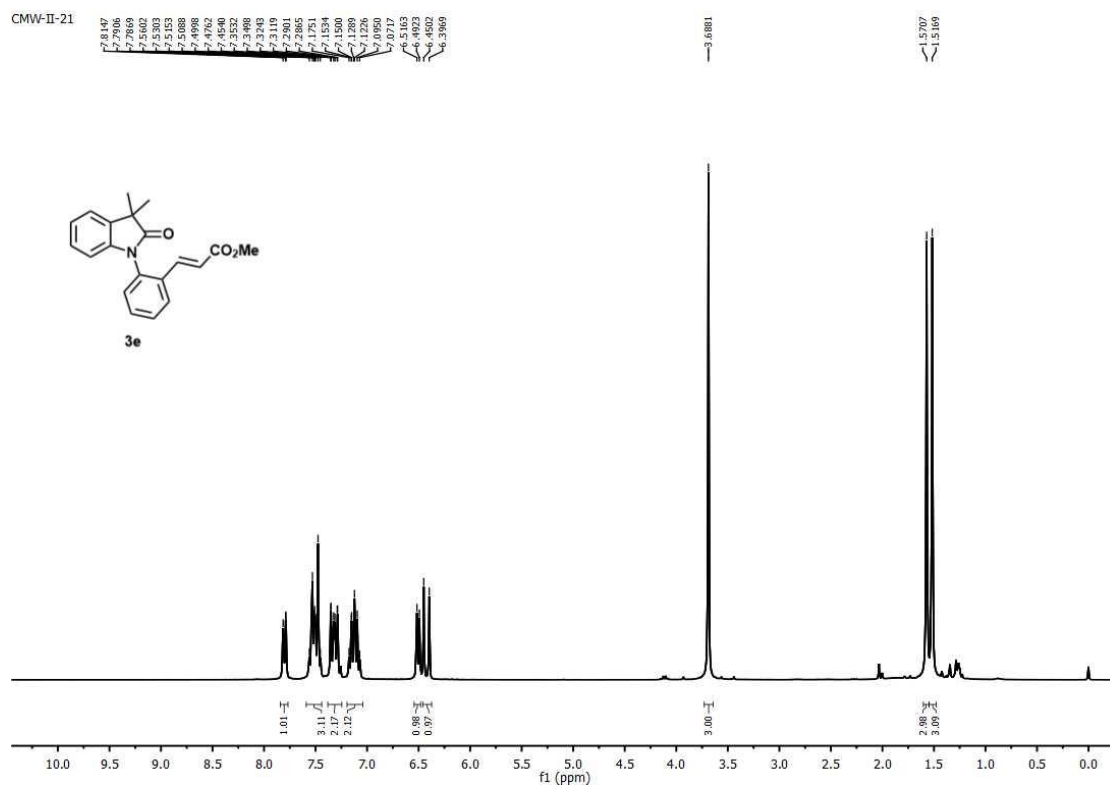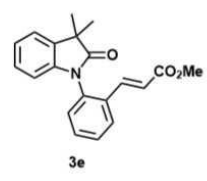

CMW-II-21 13C

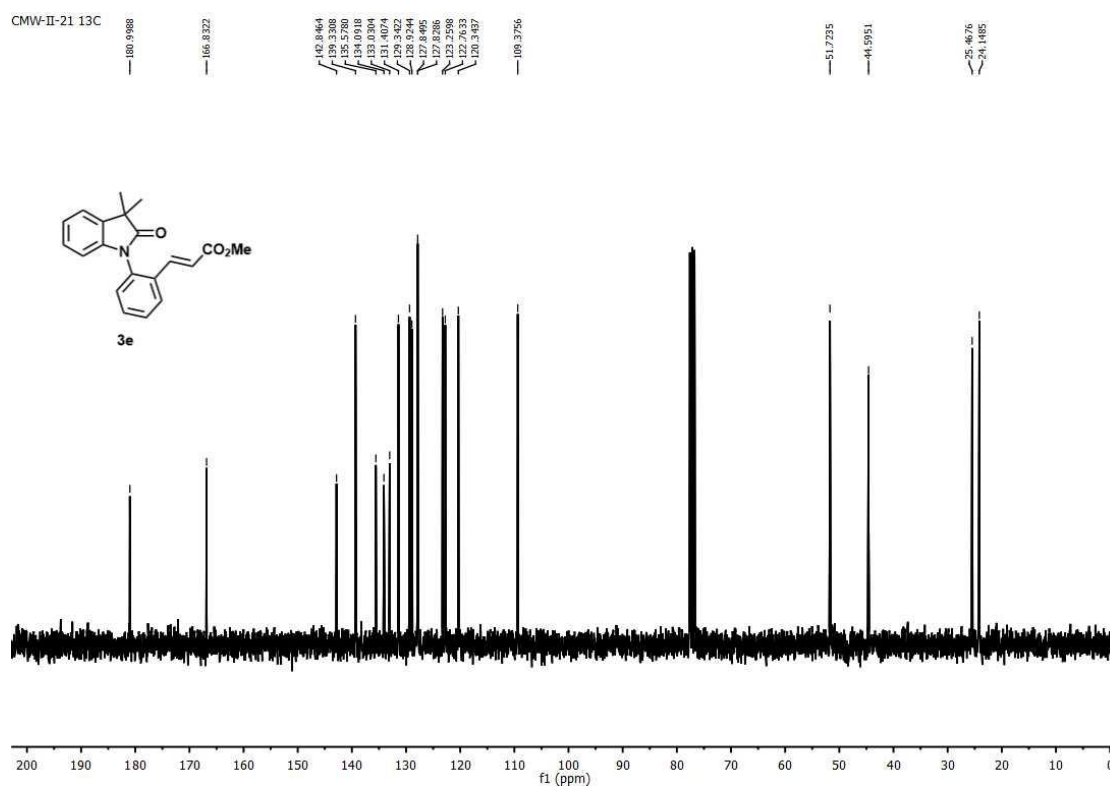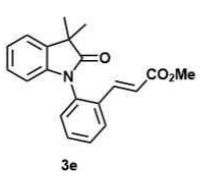

CMW-II-22 1H AGAIN-2

7.7168  
7.7158  
7.7030  
7.6889  
7.6874  
7.6858  
7.6809  
7.5592  
7.5471  
7.5353  
7.5115  
7.4103  
7.3914  
7.3800  
2.0897  
2.0862  
2.0574  
1.9382  
1.9372  
6.5150

1.3903  
1.0031

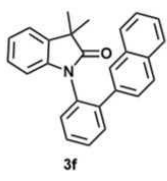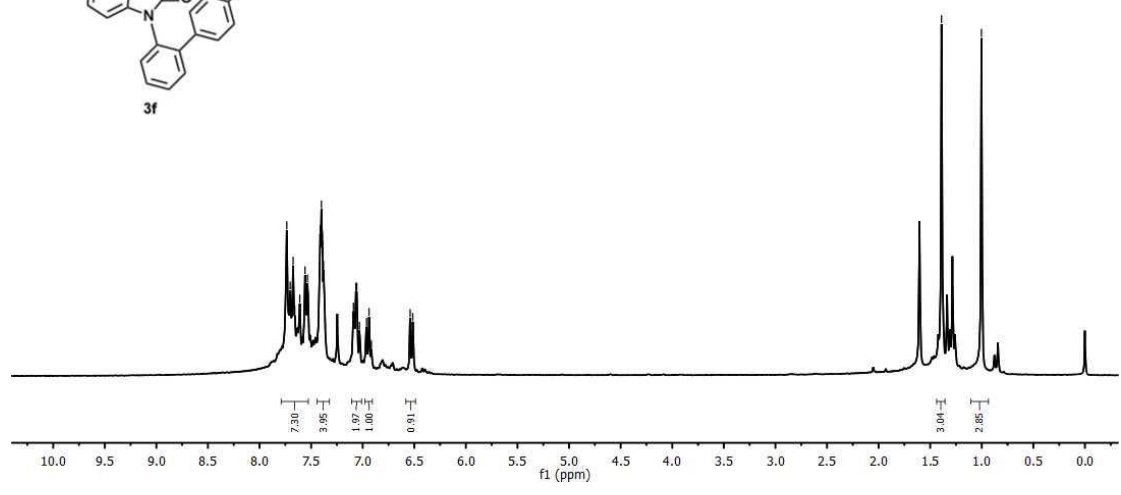

CMW-II-22 13C

180.9965

143.2144  
141.6819  
131.7141  
129.3927  
128.3332  
128.0714  
128.1595  
127.6752  
127.6596  
127.5593  
126.7233  
126.1925  
125.9784  
123.3608

44.3219

24.6814  
24.1003

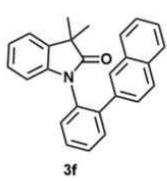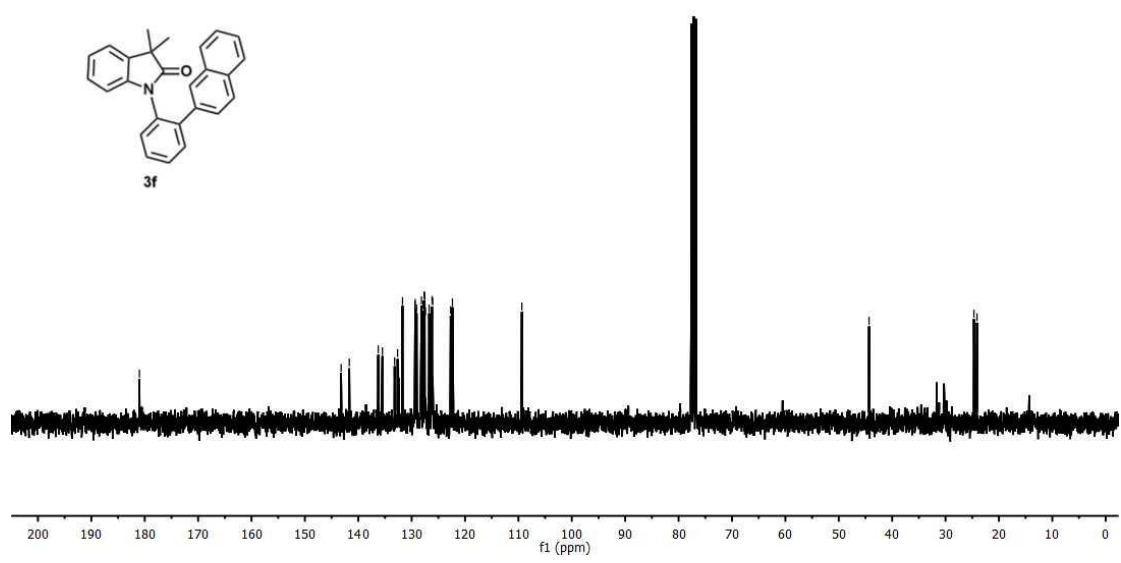

CMW-II-24 1H AGAIN

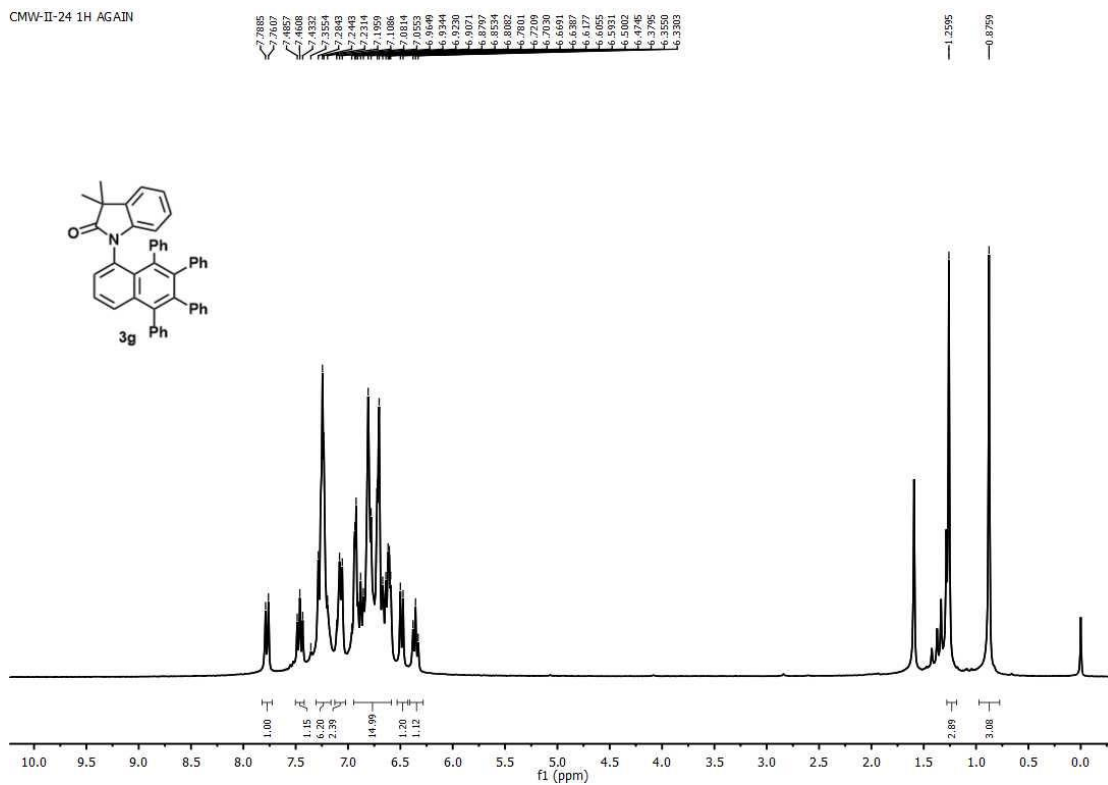

CMW-II-24 13C AGAIN

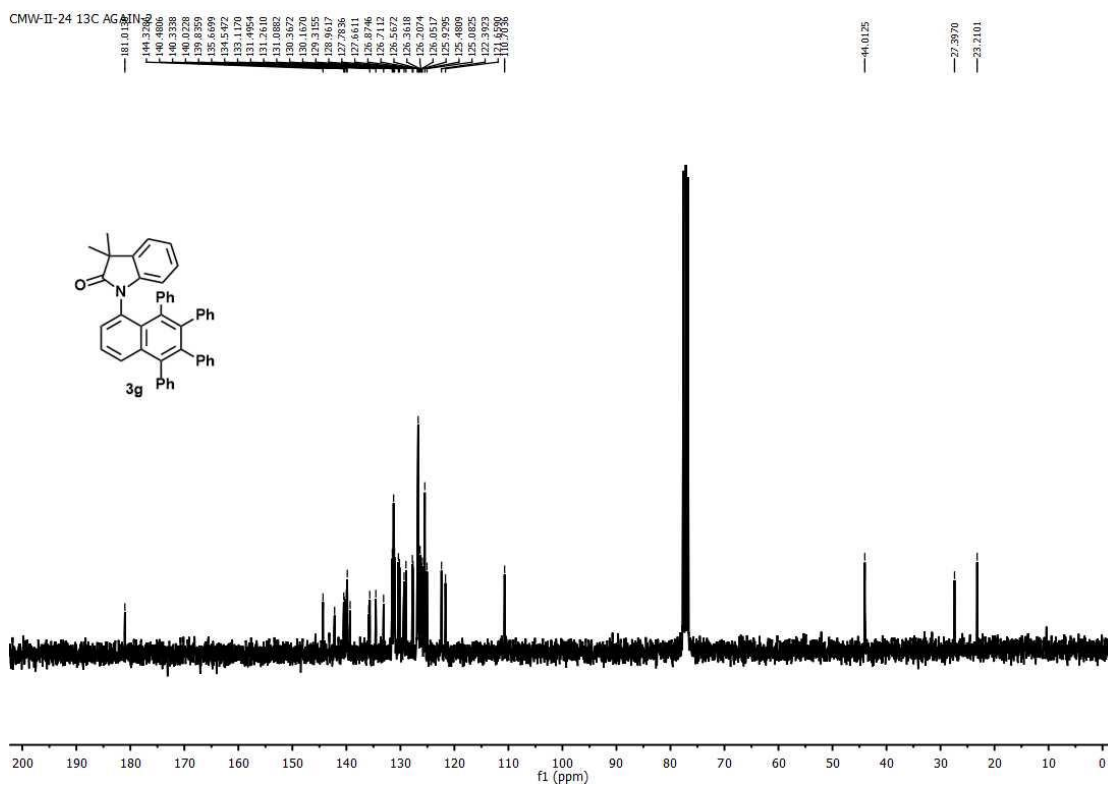

CMW-II-15

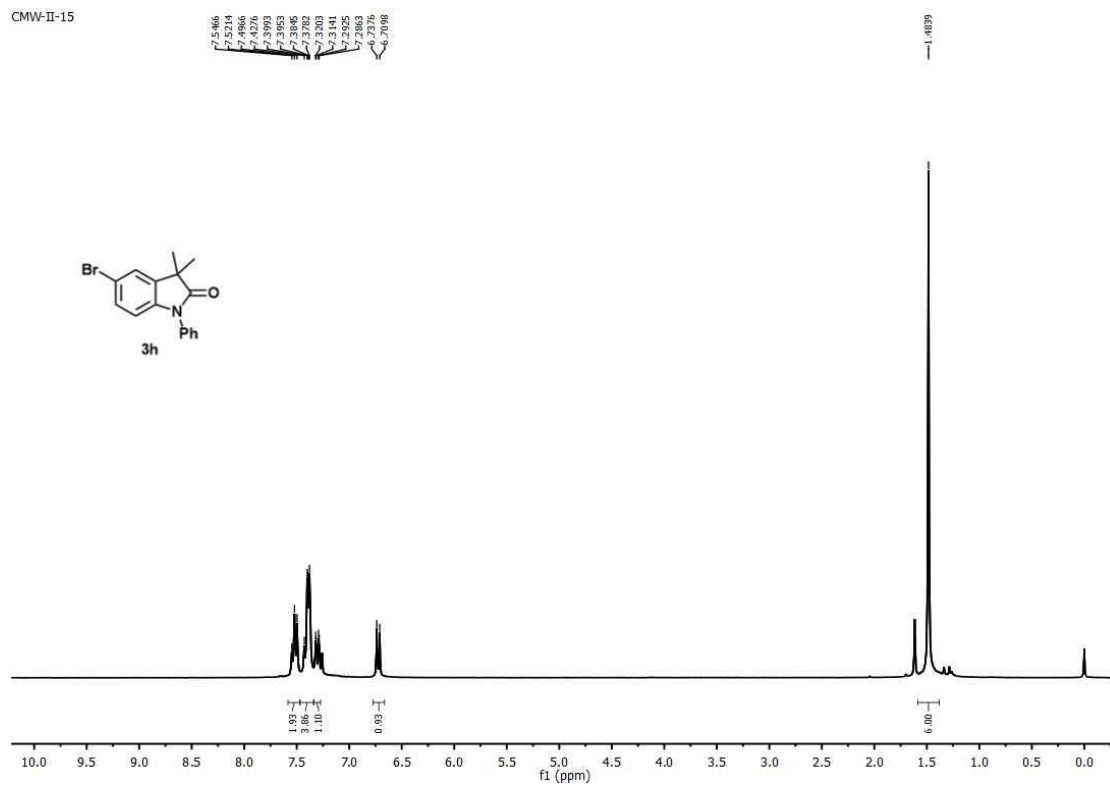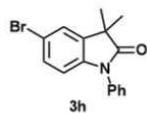

CMW-II-15 13C

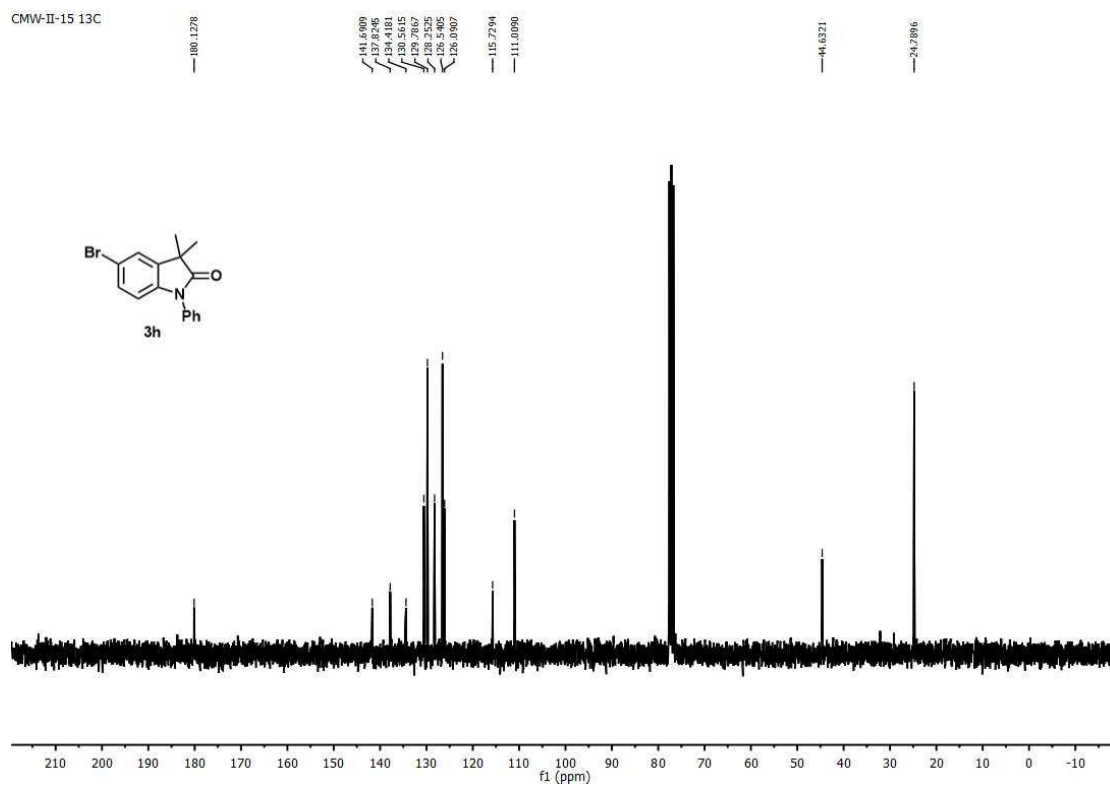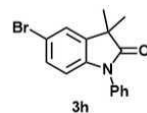

CMW-II-7

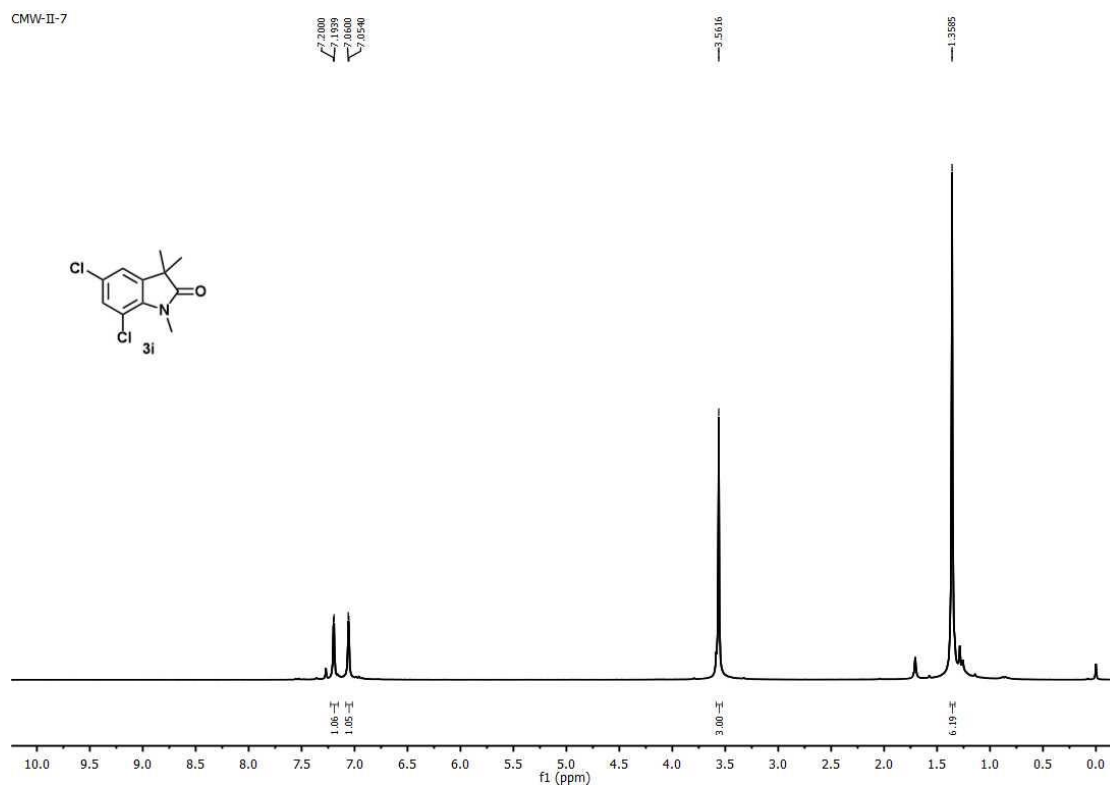

CMW-II-7 13C

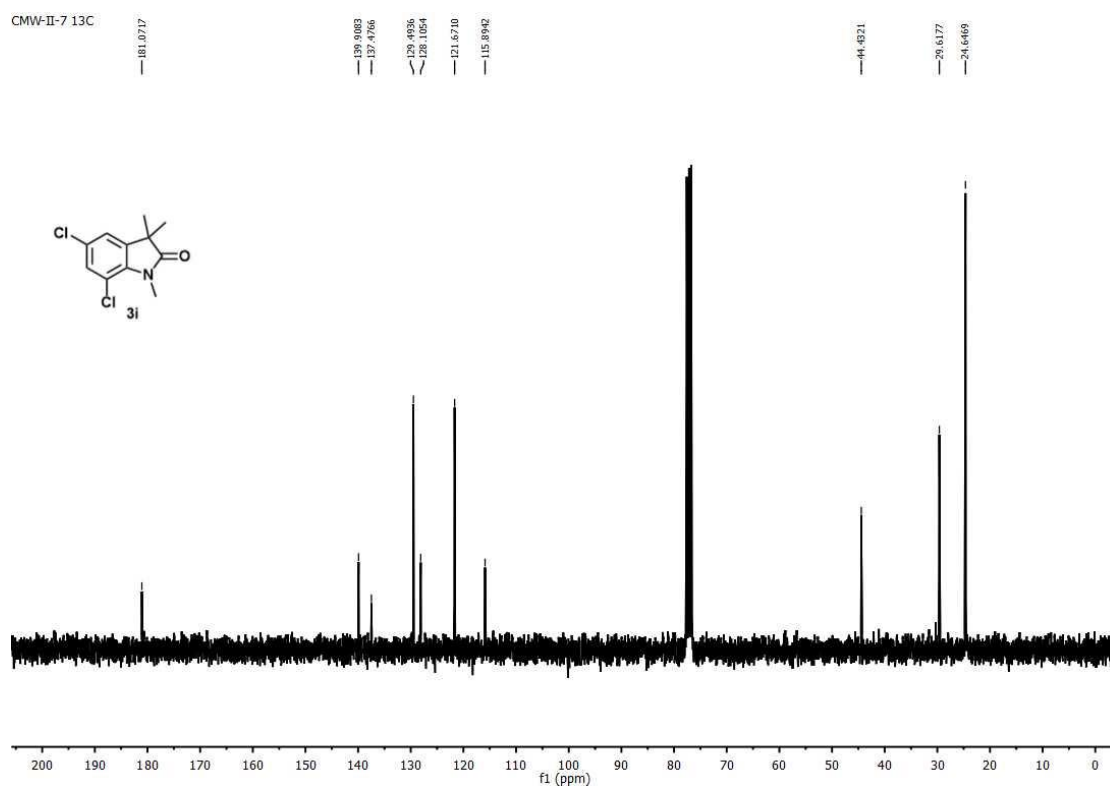

CMW-II-6

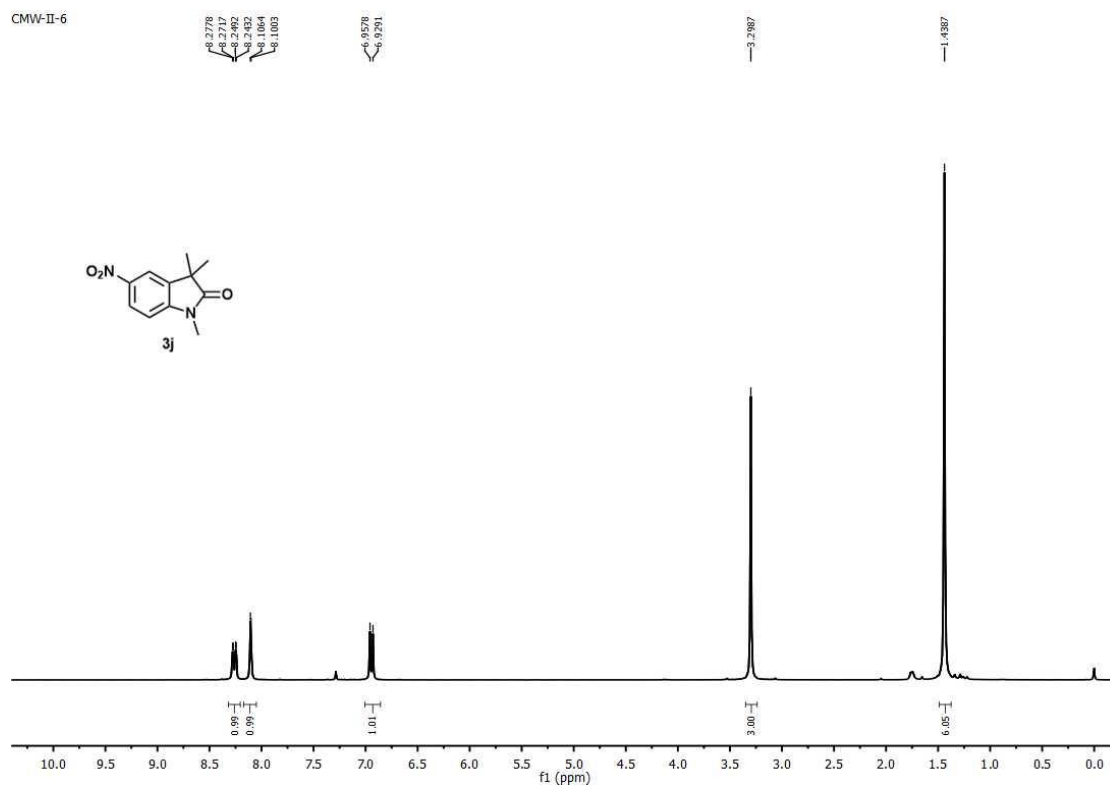

CMW-II-6 13C

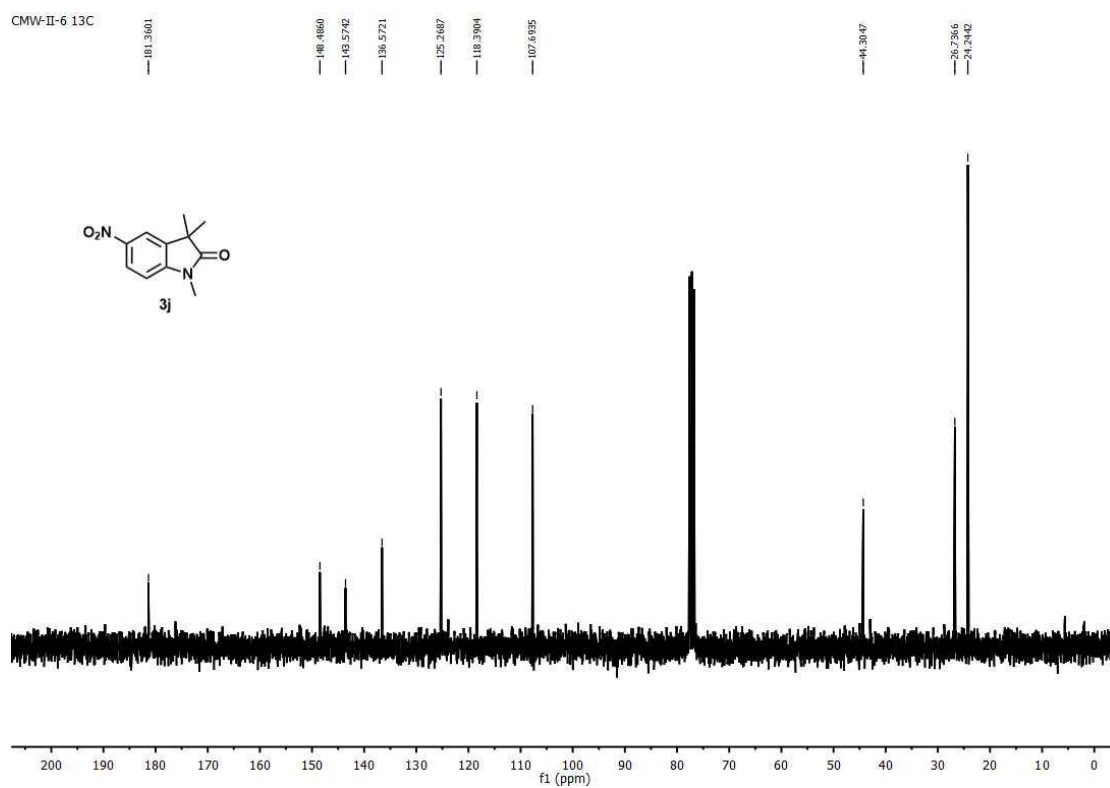

CMW-II-11

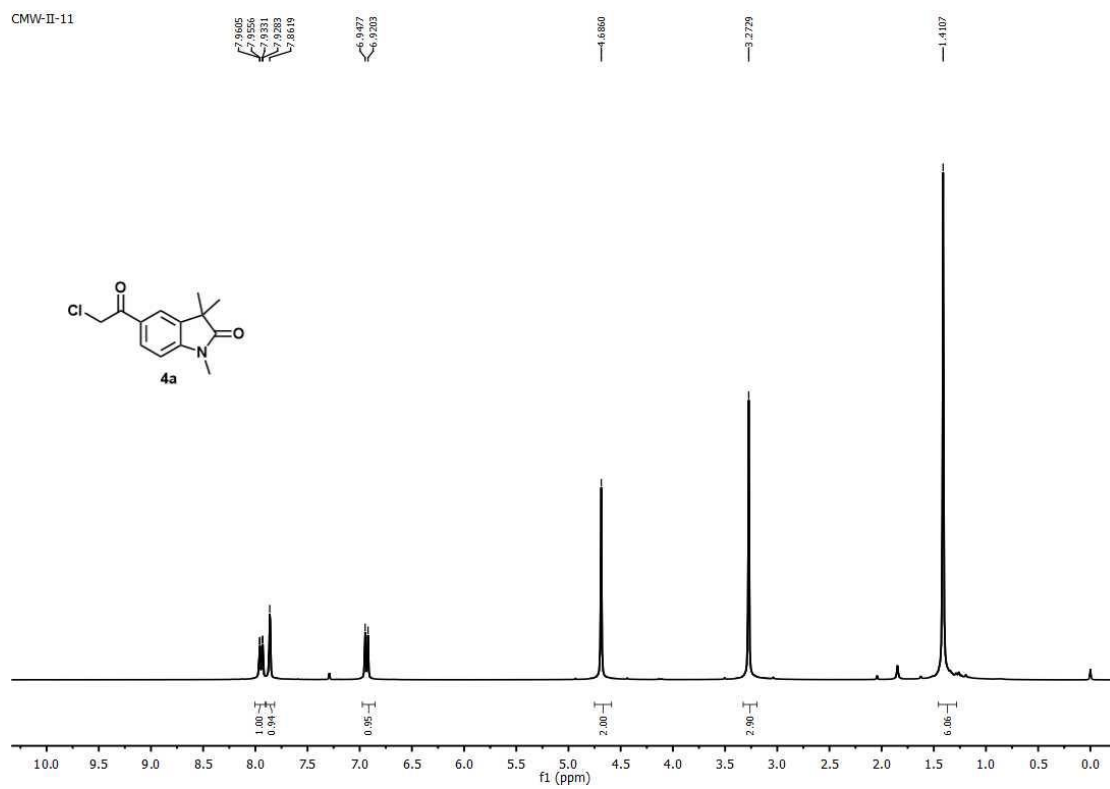

CMW-II-11 13C

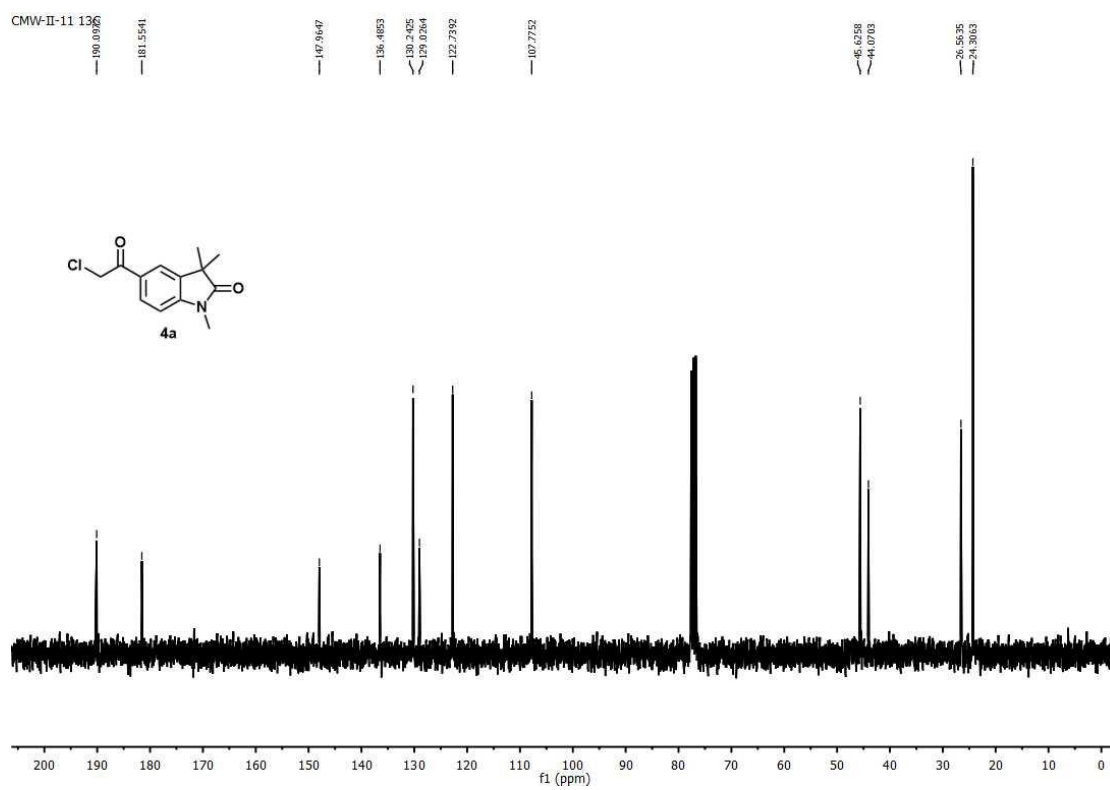



CMW-II-12

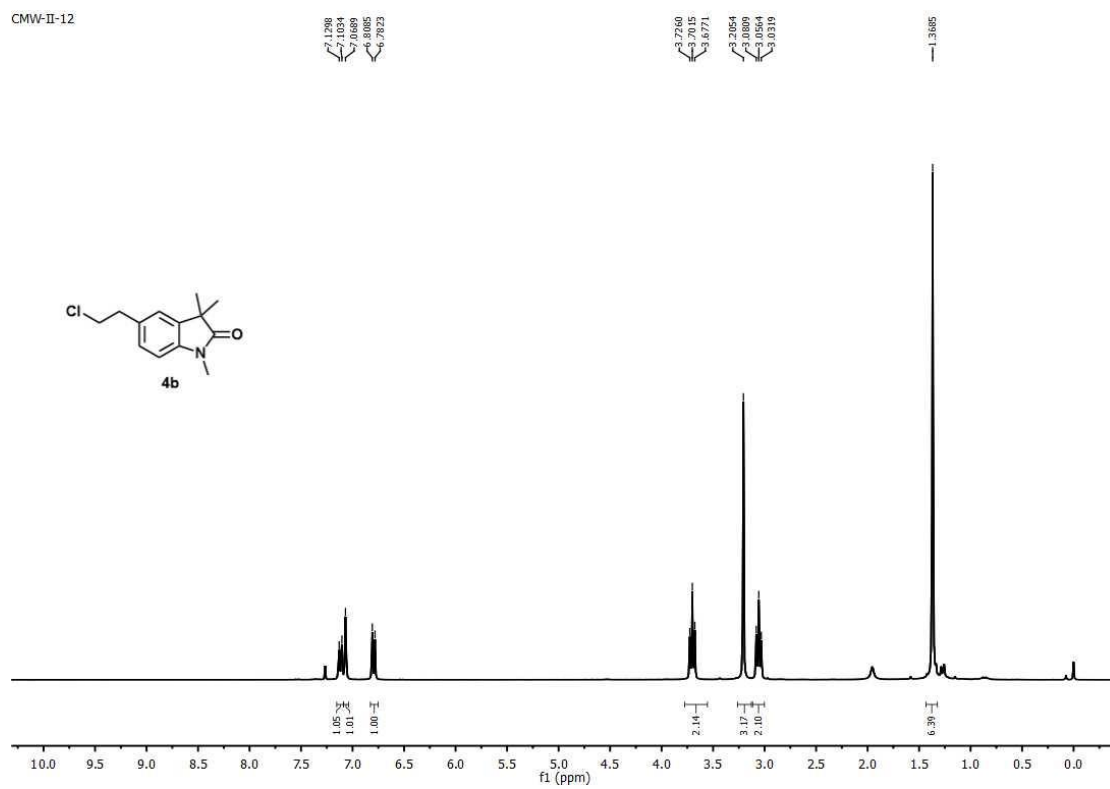

CMW-II-12 13C

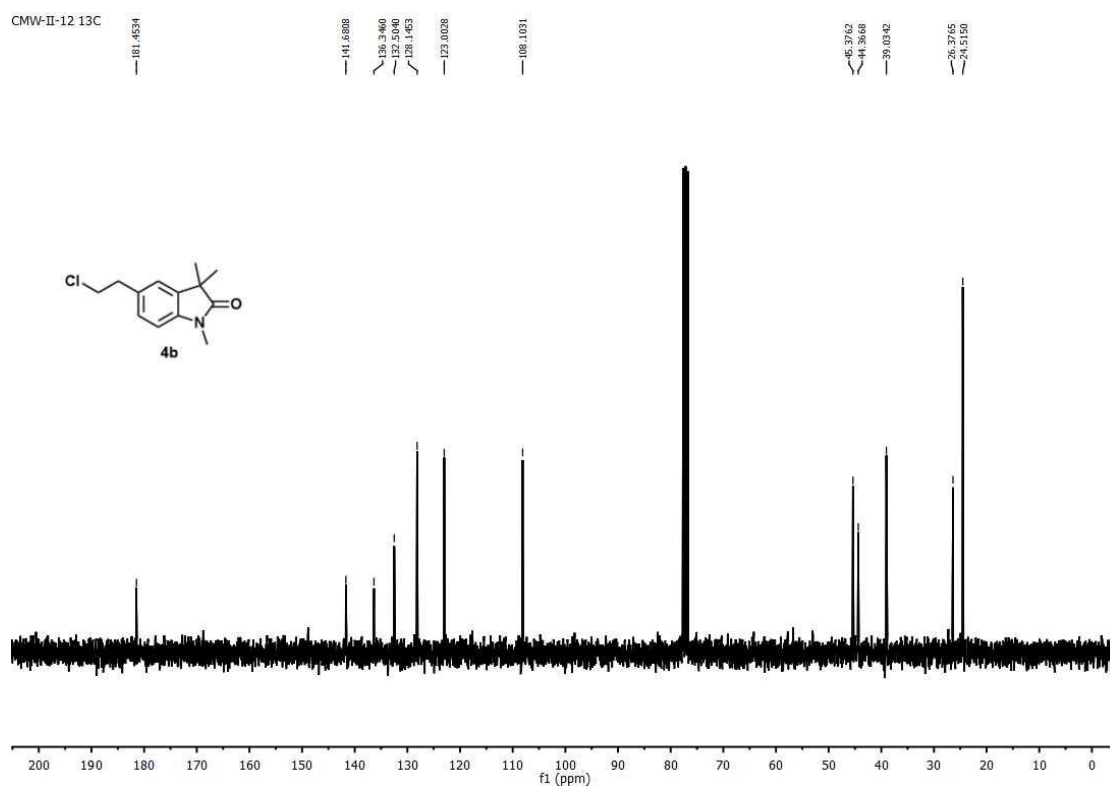

CMW-II-25 AGAIN

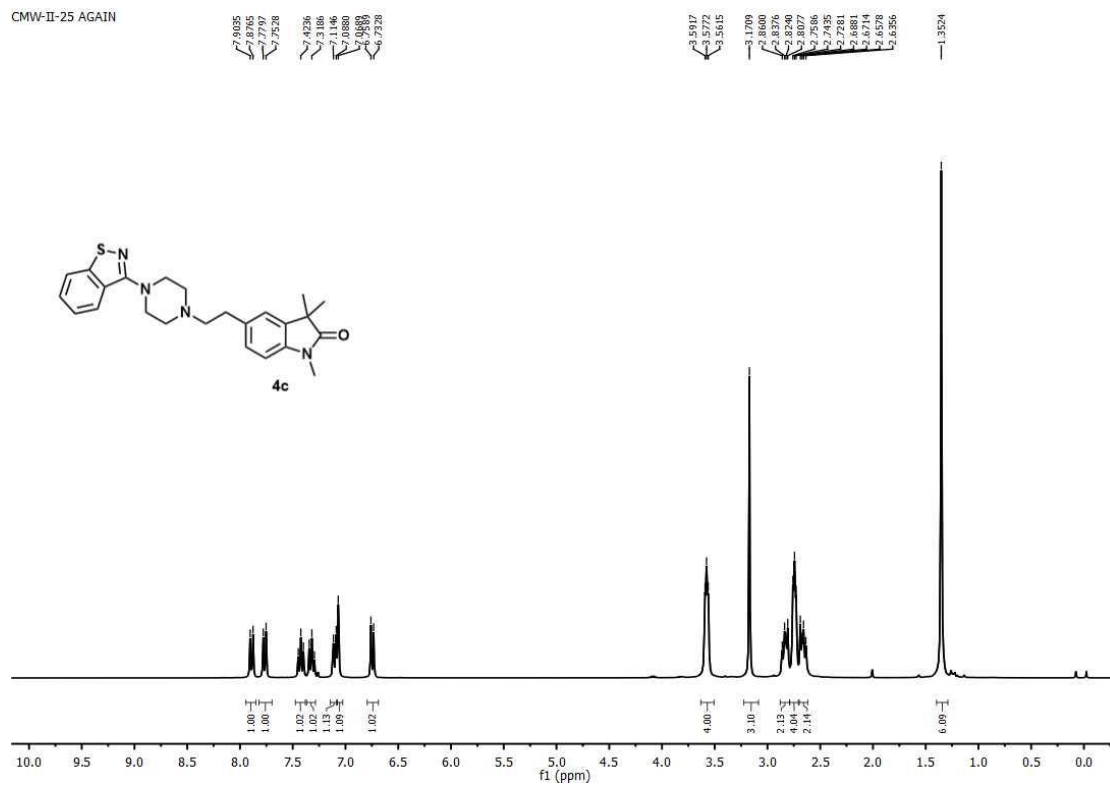

CMW-II-25 13C AGAIN

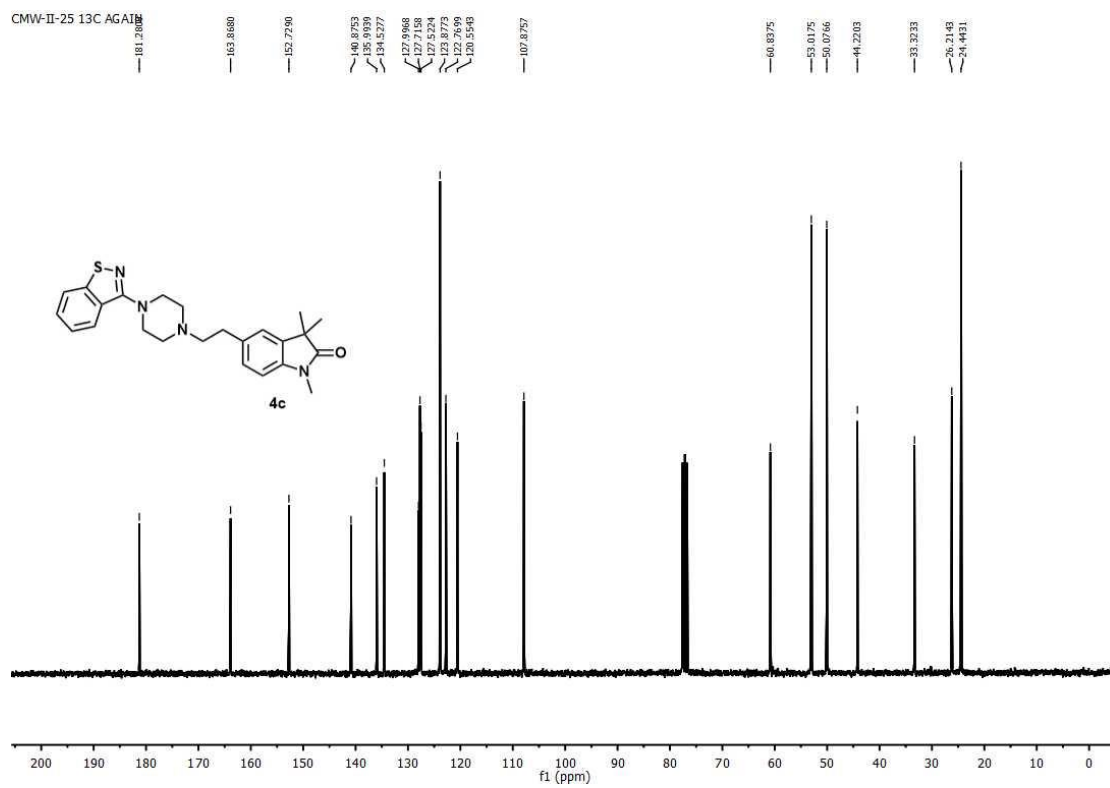

CMW-II-20

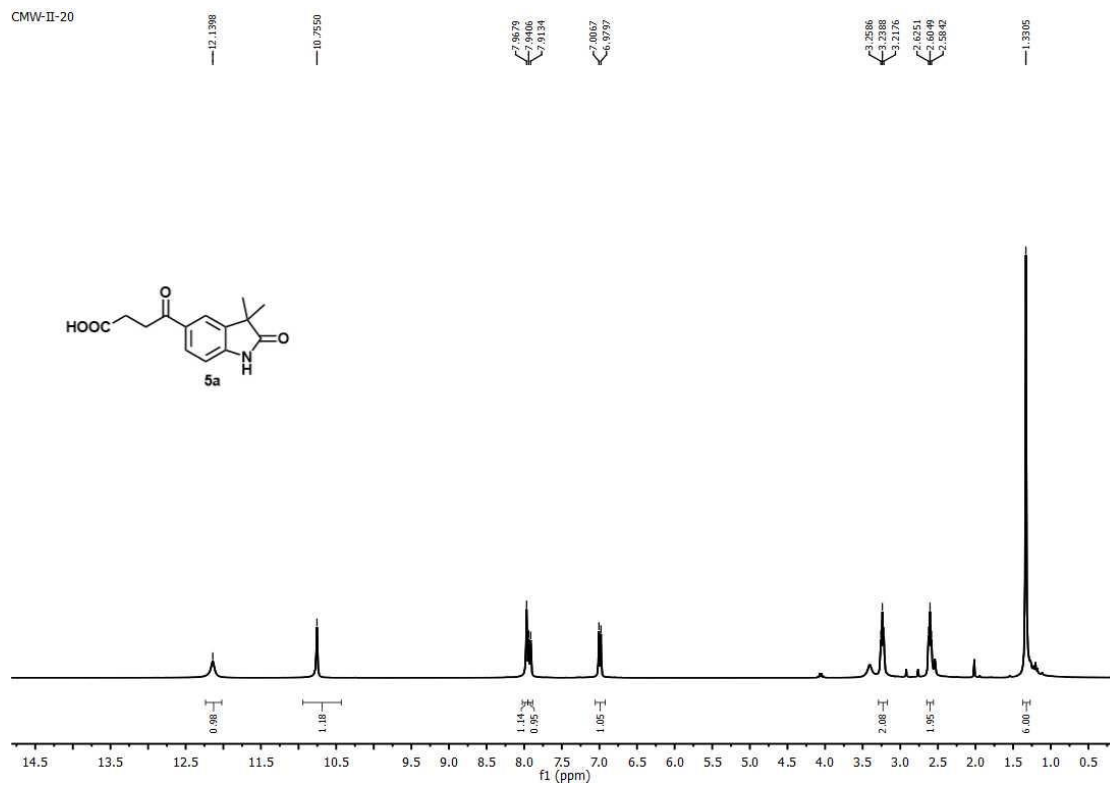

CMW-II-20 13C

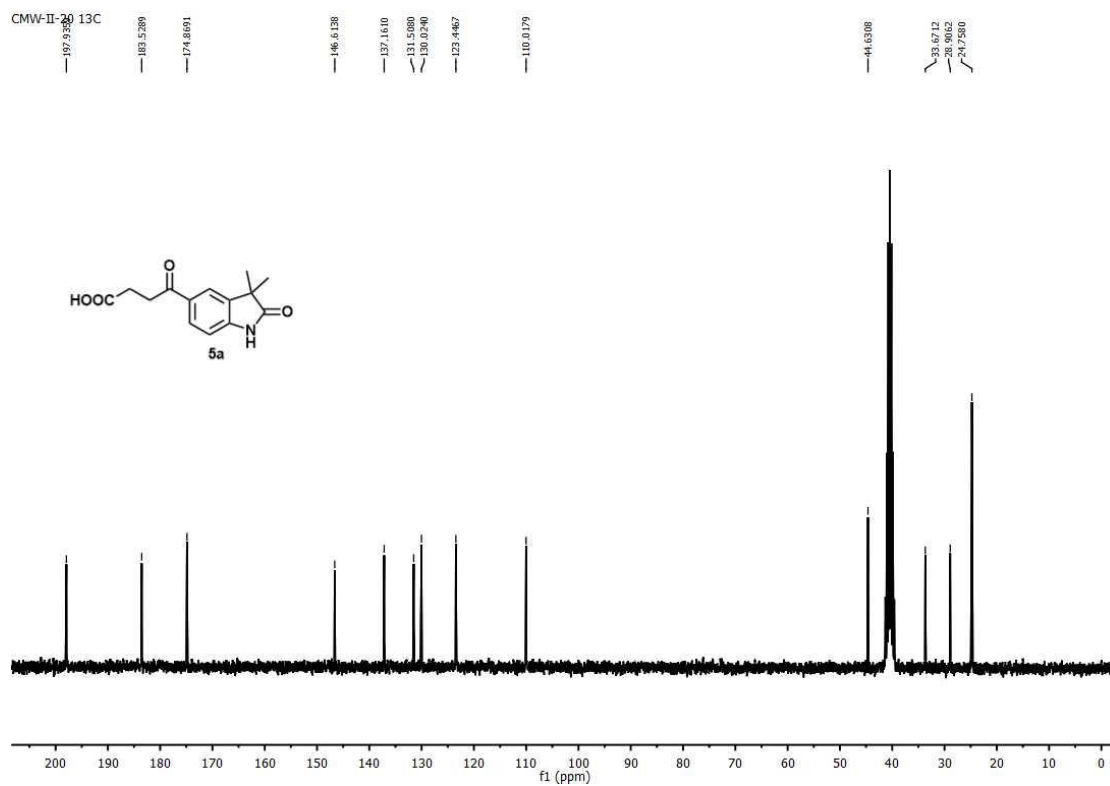

CMW-II-27

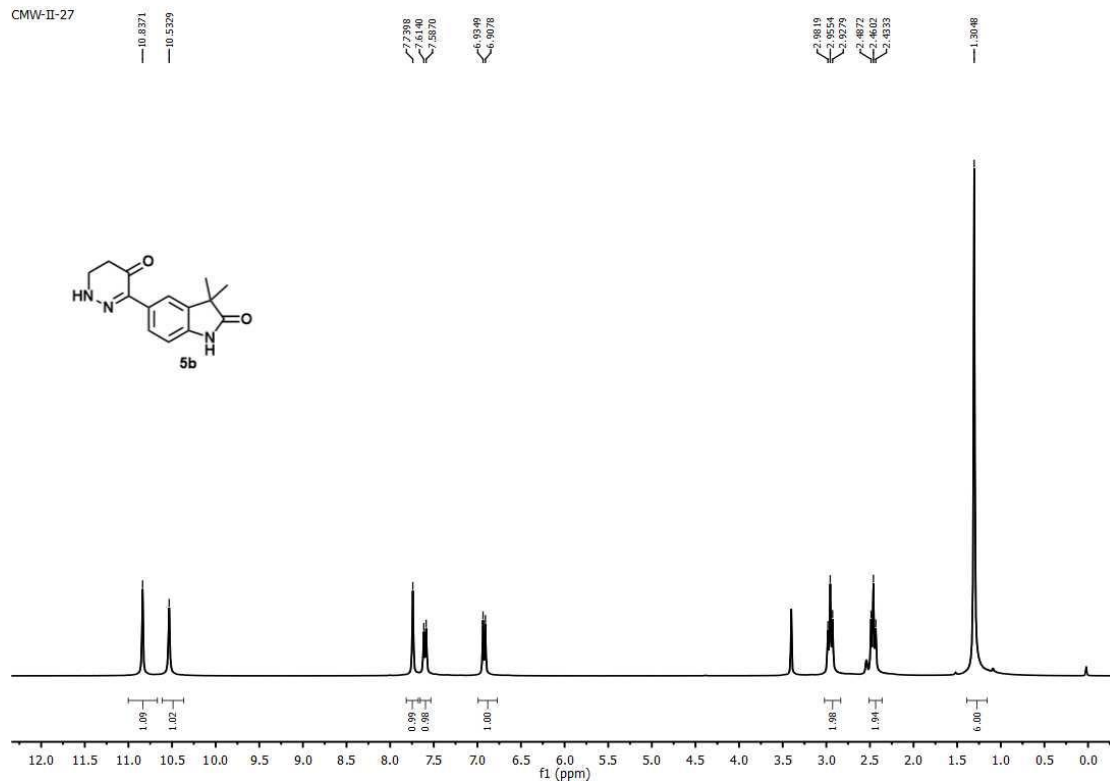

CMW-II-27 13C

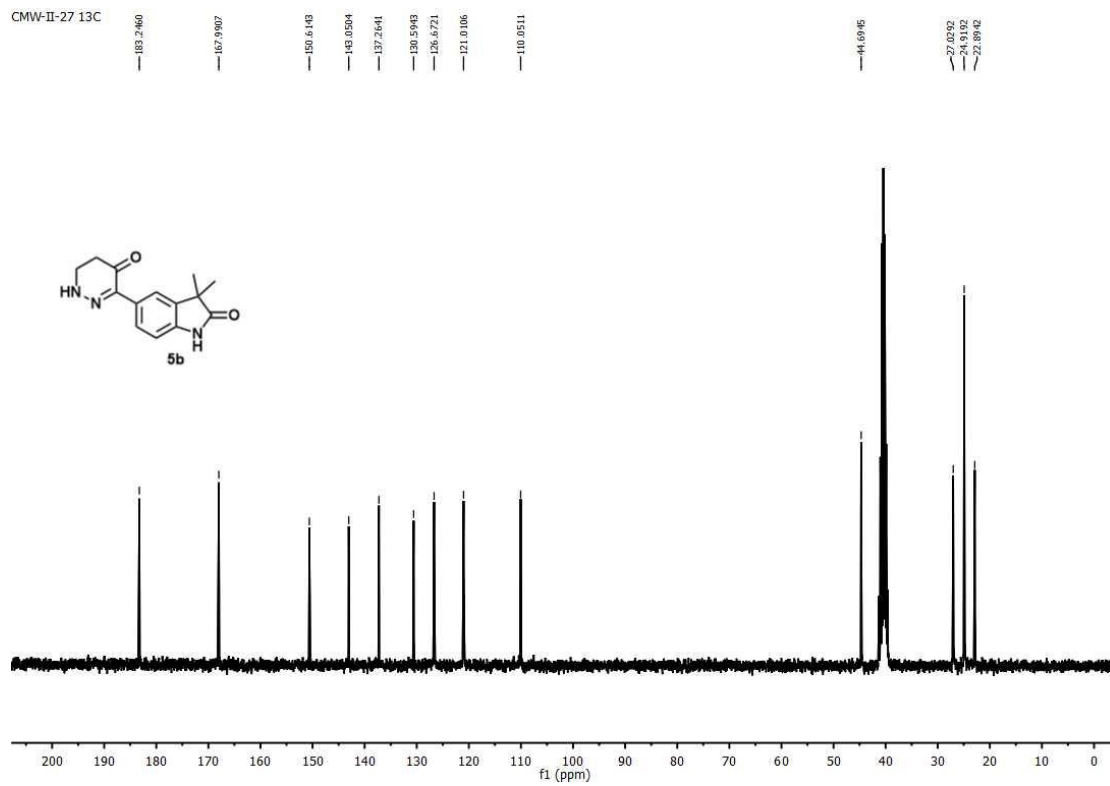

Supplement: d0qo01508c1.pdf [file d0qo01508c1.pdf]
